# Supplementary material for: Characterization of the Melanoma miRNAome by Deep Sequencing
Source: PLoS One. 2010 Mar 12;5(3):e9685. doi: 10.1371/journal.pone.0009685 (PMC2837346; doi:10.1371/journal.pone.0009685)
Supplement: Table S2 — Known Melanoma mature and mature star miRNA combined. (0.21 MB XLS) [file pone.0009685.s002.xls]

## Sheet: Sheet1
Supp Table 13- Shows the relative proportion of total unique read counts againts total number of reads. The fraction is the multiplied by a factor of 10000 to see all values
Known Mature miRNA	QF1160MB_raw count	QF1160MB_Proportion	MELB_raw count	MELB_Proportion	MM653_raw count	MM653_Proportion	D20_raw count	D20_Proportion	MM386_raw count	MM386_Proportion	MM426_raw count	MM426_Proportion	MM466_raw count	MM466_Proportion	MM603_raw count	MM603_Proportion	MM472_raw count	MM472_Proportion	D10_raw count	D10_Proportion	D11_raw count	D11_Proportion	MEL202_raw count	MEL202_Proportion
hsa-let-7a	545475	1415.24	269979	1925.88	1097637	2871.17	399235	1801.06	258777	1613.25	188137	1352.89	87808	747.498	280857	1788.64	437719	2355.42	200596	1730.4	132126	1479.77	281124	1795.13
hsa-let-7a*	3	0.00778353	2	0.0142669	96	0.251114	76	0.342858	34	0.211961	49	0.352357	14	0.11918	44	0.280215	20	0.107622	3	0.0258789	14	0.156796	44	0.280964
hsa-let-7b	178601	463.382	60059	428.428	741225	1938.88	265520	1197.84	76300	475.664	153808	1106.03	7166	61.0032	76627	488	153562	826.335	45738	394.549	25704	287.878	50650	323.428
hsa-let-7b*	16	0.0415122	2	0.0142669	252	0.659175	101	0.45564	17	0.10598	118	0.848534	3	0.0255386	17	0.108265	49	0.263675	19	0.163899	30	0.335992	46	0.293735
hsa-let-7c	8822	22.8888	2736	19.5171	9933	25.9825	34816	157.065	2215	13.8086	528	3.79683	5435	46.2674	1757	11.1895	8073	43.4418	7189	62.0144	4646	52.0339	17255	110.183
hsa-let-7c*	0	0	0	0	0	0	2	0.00902258	0	0	0	0	0	0	0	0	0	0	0	0	0	0	0	0
hsa-let-7d	97231	252.267	27458	195.87	33905	88.6878	18084	81.5821	6402	39.9109	9474	68.1272	162	1.37908	32564	207.384	22563	121.414	31658	273.091	18830	210.891	44844	286.354
hsa-let-7d*	80	0.207561	11	0.078468	70	0.183104	94	0.424061	32	0.199492	69	0.496177	0	0	174	1.10812	31	0.166815	25	0.215657	50	0.559986	121	0.772651
hsa-let-7e	166425	431.791	49040	349.824	104114	272.338	15799	71.2738	19505	121.597	6896	49.5889	8804	74.9473	10375	66.0734	27481	147.878	9369	80.8197	4338	48.5844	30335	193.706
hsa-let-7e*	9	0.0233506	2	0.0142669	25	0.0653943	14	0.063158	12	0.0748096	7	0.0503368	8	0.068103	3	0.0191056	6	0.0322867	0	0	2	0.0223995	3	0.0191566
hsa-let-7f	1248682	3239.72	623004	4444.17	643096	1682.19	484504	2185.74	190077	1184.97	287715	2068.95	42432	361.218	553036	3522.02	528556	2844.22	413514	3567.09	398683	4465.14	692048	4419.11
hsa-let-7f-1*	7	0.0181616	6	0.0428007	51	0.133404	15	0.0676693	10	0.0623413	15	0.107864	0	0	47	0.29932	5	0.0269056	0	0	10	0.111997	36	0.22988
hsa-let-7f-2*	0	0	0	0	0	0	2	0.00902258	0	0	0	0	2	0.0170257	0	0	0	0	0	0	0	0	0	0
hsa-let-7g	72663	188.525	24252	173	30414	79.5561	34220	154.376	26842	167.337	27369	196.81	1709	14.5485	35161	223.923	20836	112.121	19043	164.27	27858	312.002	31274	199.702
hsa-let-7g*	0	0	0	0	2	0.00523154	0	0	0	0	0	0	0	0	2	0.012737	0	0	0	0	0	0	0	0
hsa-let-7i	232522	603.281	45935	327.675	63531	166.183	66365	299.392	71880	448.11	26265	188.871	1112	9.46631	26098	166.206	38717	208.341	31000	267.415	23114	258.87	12596	80.4324
hsa-let-7i*	53	0.137509	10	0.0713345	18	0.0470839	24	0.108271	20	0.124683	20	0.143819	0	0	2	0.012737	6	0.0322867	4	0.0345052	5	0.0559986	4	0.0255422
hsa-miR-1	11	0.0285396	32	0.22827	129	0.337435	2243	10.1188	12	0.0748096	17	0.122246	32731	278.635	9	0.0573167	173	0.930933	129	1.11279	17	0.190395	139	0.887591
hsa-miR-100	1200	3.11341	305	2.1757	10753	28.1274	2677	12.0767	2117	13.1977	824	5.92535	321	2.73263	42	0.267478	2145	11.5425	79	0.681477	143	1.60156	2	0.0127711
hsa-miR-100*	0	0	0	0	6	0.0156946	2	0.00902258	0	0	0	0	0	0	0	0	0	0	0	0	0	0	0	0
hsa-miR-101	4649	12.0619	3181	22.6915	1812	4.73978	998	4.50227	2146	13.3785	1438	10.3406	1629	13.8675	1044	6.64873	1671	8.99185	1319	11.3781	2451	27.4505	3273	20.8999
hsa-miR-103	105204	272.953	23364	166.666	45132	118.055	55176	248.915	60836	379.26	56268	404.621	90448	769.972	94502	601.838	59109	318.072	20348	175.528	34590	387.399	49723	317.509
hsa-miR-105	0	0	0	0	0	0	80	0.360903	18	0.112214	2	0.0143819	0	0	12	0.0764222	17	0.091479	0	0	11	0.123197	0	0
hsa-miR-105*	0	0	0	0	0	0	2	0.00902258	0	0	0	0	0	0	0	0	0	0	0	0	0	0	0	0
hsa-miR-106a	63	0.163454	0	0	0	0	284	1.28121	211	1.3154	418	3.00582	84	0.715081	0	0	0	0	31	0.267415	28	0.313592	11	0.070241
hsa-miR-106b	999	2.59192	231	1.64783	515	1.34712	1745	7.8722	1292	8.0545	2420	17.4021	2421	20.6097	883	5.6234	1769	9.5192	1099	9.48029	1019	11.4125	2183	13.9397
hsa-miR-106b*	231	0.599332	51	0.363806	128	0.334819	231	1.04211	382	2.38144	135	0.97078	268	2.28145	155	0.98712	135	0.726451	68	0.586588	62	0.694383	361	2.30518
hsa-miR-107	8777	22.772	4860	34.6686	5244	13.7171	5154	23.2512	7038	43.8758	5786	41.6069	11212	95.4463	6833	43.5161	3850	20.7173	3072	26.5	2875	32.1992	12579	80.3238
hsa-miR-10a	10417	27.027	3704	26.4223	501	1.3105	2446	11.0346	1251	7.7989	2229	16.0287	1593	13.561	1642	10.4571	3963	21.3254	340	2.93294	1258	14.0893	24	0.153253
hsa-miR-10a*	19	0.0492957	5	0.0356673	0	0	9	0.0406016	0	0	3	0.0215729	3	0.0255386	0	0	5	0.0269056	0	0	0	0	0	0
hsa-miR-10b	1449	3.75945	827	5.89936	1739	4.54883	202	0.91128	578	3.60333	176	1.26561	228	1.94093	112	0.713274	515	2.77128	18	0.155273	169	1.89275	0	0
hsa-miR-10b*	6	0.0155671	2	0.0142669	0	0	0	0	5	0.0311707	0	0	0	0	0	0	0	0	0	0	0	0	0	0
hsa-miR-1180	0	0	0	0	0	0	61	0.275189	29	0.18079	20	0.143819	2	0.0170257	3	0.0191056	0	0	0	0	0	0	0	0
hsa-miR-1185	0	0	0	0	43	0.112478	0	0	0	0	0	0	0	0	0	0	0	0	0	0	0	0	0	0
hsa-miR-1197	0	0	0	0	57	0.149099	0	0	0	0	0	0	0	0	0	0	0	0	0	0	0	0	0	0
hsa-miR-122	6	0.0155671	22	0.156936	14	0.0366208	53	0.239098	26	0.162087	23	0.165392	42	0.357541	10	0.0636852	21	0.113003	6	0.0517577	20	0.223995	5	0.0319277
hsa-miR-1224-5p	0	0	0	0	0	0	0	0	2	0.0124683	0	0	0	0	0	0	0	0	0	0	0	0	0	0
hsa-miR-1226	0	0	0	0	0	0	0	0	0	0	2	0.0143819	0	0	0	0	0	0	0	0	0	0	0	0
hsa-miR-1226*	0	0	0	0	0	0	0	0	3	0.0187024	0	0	0	0	0	0	0	0	0	0	0	0	0	0
hsa-miR-1227	0	0	0	0	0	0	3	0.0135339	2	0.0124683	0	0	0	0	0	0	0	0	0	0	0	0	2	0.0127711
hsa-miR-1228	2	0.00518902	0	0	0	0	0	0	0	0	0	0	0	0	0	0	0	0	0	0	0	0	0	0
hsa-miR-1228*	2	0.00518902	0	0	14	0.0366208	2	0.00902258	0	0	0	0	0	0	0	0	0	0	0	0	0	0	0	0
hsa-miR-124	0	0	0	0	6	0.0156946	2	0.00902258	0	0	0	0	0	0	0	0	0	0	0	0	0	0	0	0
hsa-miR-1246	2279	5.91289	178	1.26975	25	0.0653943	26	0.117293	117	0.729394	64	0.460222	101	0.8598	48	0.305689	13	0.0699545	167	1.44059	46	0.515187	6	0.0383133
hsa-miR-1248	0	0	0	0	0	0	16	0.0721806	0	0	2	0.0143819	0	0	5	0.0318426	4	0.0215245	0	0	0	0	0	0
hsa-miR-1249	41	0.106375	4	0.0285338	0	0	9	0.0406016	5	0.0311707	3	0.0215729	6	0.0510772	8	0.0509481	0	0	0	0	2	0.0223995	0	0
hsa-miR-1250	0	0	0	0	0	0	6	0.0270677	0	0	0	0	0	0	5	0.0318426	0	0	0	0	0	0	2	0.0127711
hsa-miR-1252	0	0	0	0	0	0	0	0	2	0.0124683	0	0	0	0	0	0	0	0	0	0	0	0	0	0
hsa-miR-1254	66	0.171238	7	0.0499342	9	0.0235419	24	0.108271	32	0.199492	5	0.0359548	18	0.153232	8	0.0509481	6	0.0322867	6	0.0517577	2	0.0223995	18	0.11494
hsa-miR-1255a	46	0.119347	29	0.20687	28	0.0732416	39	0.17594	61	0.380282	18	0.129437	20	0.170257	12	0.0764222	32	0.172196	50	0.431314	3	0.0335992	7	0.0446988
hsa-miR-1255b	35	0.0908079	2	0.0142669	21	0.0549312	12	0.0541355	16	0.0997461	5	0.0359548	10	0.0851287	10	0.0636852	13	0.0699545	5	0.0431314	32	0.358391	8	0.0510844
hsa-miR-1256	7	0.0181616	2	0.0142669	2	0.00523154	0	0	5	0.0311707	0	0	2	0.0170257	3	0.0191056	3	0.0161434	0	0	0	0	3	0.0191566
hsa-miR-1257	0	0	0	0	0	0	0	0	0	0	0	0	2	0.0170257	0	0	0	0	0	0	0	0	0	0
hsa-miR-1259	25	0.0648628	2	0.0142669	64	0.167409	60	0.270677	30	0.187024	94	0.675951	101	0.8598	39	0.248372	262	1.40985	17	0.146647	125	1.39997	35	0.223494
hsa-miR-125a-3p	16	0.0415122	0	0	19	0.0496997	14	0.063158	8	0.0498731	6	0.0431458	6	0.0510772	0	0	0	0	2	0.0172526	2	0.0223995	2	0.0127711
hsa-miR-125a-5p	1061	2.75278	260	1.8547	740	1.93567	209	0.942859	283	1.76426	150	1.07864	138	1.17478	115	0.73238	190	1.02241	43	0.37093	44	0.492788	204	1.30265
hsa-miR-125b	396	1.02743	234	1.66923	9358	24.4784	620	2.797	331	2.0635	130	0.934825	142	1.20883	23	0.146476	589	3.16948	91	0.784992	59	0.660784	146	0.93229
hsa-miR-125b-1*	3	0.00778353	0	0	593	1.55115	25	0.112782	21	0.130917	4	0.0287639	0	0	0	0	21	0.113003	0	0	0	0	0	0
hsa-miR-125b-2*	0	0	0	0	0	0	16	0.0721806	0	0	2	0.0143819	2	0.0170257	0	0	2	0.0107622	4	0.0345052	0	0	4	0.0255422
hsa-miR-126	0	0	0	0	0	0	3	0.0135339	0	0	0	0	0	0	0	0	0	0	0	0	0	0	0	0
hsa-miR-126*	0	0	0	0	0	0	0	0	8	0.0498731	2	0.0143819	5	0.0425643	5	0.0318426	0	0	2	0.0172526	0	0	0	0
hsa-miR-1260	0	0	0	0	0	0	2	0.00902258	0	0	0	0	0	0	0	0	0	0	0	0	0	0	0	0
hsa-miR-1262	50	0.129726	3	0.0214004	3	0.00784732	18	0.0812032	51	0.317941	11	0.0791006	19	0.161745	7	0.0445796	8	0.0430489	0	0	19	0.212795	11	0.070241
hsa-miR-1266	0	0	0	0	0	0	4	0.0180452	5	0.0311707	5	0.0359548	0	0	0	0	0	0	9	0.0776366	12	0.134397	0	0
hsa-miR-1267	0	0	0	0	0	0	0	0	0	0	0	0	0	0	0	0	0	0	0	0	0	0	2	0.0127711
hsa-miR-1268	14	0.0363231	0	0	34	0.0889363	304	1.37143	1037	6.4648	81	0.582468	104	0.885338	41	0.261109	0	0	0	0	0	0	0	0
hsa-miR-1269	0	0	0	0	0	0	1941	8.75641	355	2.21312	4	0.0287639	0	0	402	2.56014	5353	28.8051	0	0	0	0	0	0
hsa-miR-1270	0	0	3	0.0214004	18	0.0470839	60	0.270677	0	0	0	0	0	0	0	0	0	0	0	0	0	0	0	0
hsa-miR-1271	18	0.0467012	5	0.0356673	17	0.0444681	3	0.0135339	20	0.124683	17	0.122246	0	0	8	0.0509481	3	0.0161434	3	0.0258789	0	0	19	0.121325
hsa-miR-1272	0	0	0	0	0	0	0	0	0	0	23	0.165392	0	0	37	0.235635	0	0	2	0.0172526	0	0	0	0
hsa-miR-127-3p	0	0	73	0.520742	8320	21.7632	0	0	0	0	0	0	0	0	0	0	0	0	0	0	0	0	0	0
hsa-miR-1274a	2	0.00518902	0	0	0	0	43	0.193985	19	0.118449	19	0.136628	31	0.263899	14	0.0891593	4	0.0215245	2	0.0172526	0	0	4	0.0255422
hsa-miR-1274b	935	2.42587	129	0.920215	1079	2.82242	2142	9.66318	1953	12.1753	2170	15.6044	1773	15.0933	2189	13.9407	293	1.57667	162	1.39746	165	1.84795	101	0.64494
hsa-miR-1275	6	0.0155671	0	0	0	0	475	2.14286	269	1.67698	15	0.107864	52	0.442669	10	0.0636852	0	0	0	0	0	0	0	0
hsa-miR-127-5p	0	0	0	0	216	0.565007	0	0	0	0	0	0	0	0	0	0	0	0	0	0	0	0	0	0
hsa-miR-1276	5	0.0129726	0	0	0	0	20	0.0902258	3	0.0187024	17	0.122246	13	0.110667	26	0.165581	15	0.0807168	5	0.0431314	19	0.212795	17	0.108554
hsa-miR-1277	16	0.0415122	3	0.0214004	23	0.0601628	27	0.121805	30	0.187024	19	0.136628	22	0.187283	12	0.0764222	9	0.0484301	2	0.0172526	7	0.0783981	11	0.070241
hsa-miR-1278	50	0.129726	17	0.121269	47	0.122941	23	0.10376	44	0.274302	21	0.15101	37	0.314976	40	0.254741	40	0.215245	20	0.172526	36	0.40319	71	0.453374
hsa-miR-128	3896	10.1082	1230	8.77414	1613	4.21924	2220	10.0151	3238	20.1861	1120	8.05388	5191	44.1903	2976	18.9527	3821	20.5613	1072	9.24738	2952	33.0616	1543	9.8529
hsa-miR-1280	44	0.114158	5	0.0356673	114	0.298198	104	0.469174	29	0.18079	180	1.29437	93	0.791697	34	0.21653	22	0.118385	13	0.112142	40	0.447989	27	0.17241
hsa-miR-1283	0	0	0	0	0	0	4	0.0180452	0	0	0	0	0	0	2	0.012737	0	0	0	0	0	0	0	0
hsa-miR-1284	0	0	0	0	0	0	0	0	3	0.0187024	0	0	0	0	0	0	0	0	0	0	0	0	2	0.0127711
hsa-miR-1285	239	0.620088	25	0.178336	39	0.102015	202	0.91128	184	1.14708	147	1.05707	352	2.99653	98	0.624115	59	0.317486	41	0.353678	22	0.246394	69	0.440603
hsa-miR-1286	3	0.00778353	0	0	0	0	44	0.198497	28	0.174556	7	0.0503368	12	0.102154	206	1.31191	0	0	6	0.0517577	0	0	9	0.0574699
hsa-miR-1287	7	0.0181616	0	0	20	0.0523154	272	1.22707	271	1.68945	37	0.266066	8	0.068103	130	0.827907	11	0.0591923	4	0.0345052	20	0.223995	41	0.261808
hsa-miR-1289	2	0.00518902	0	0	0	0	0	0	0	0	0	0	0	0	0	0	0	0	0	0	0	0	0	0
hsa-miR-1291	0	0	0	0	0	0	6	0.0270677	8	0.0498731	11	0.0791006	3	0.0255386	4	0.0254741	0	0	0	0	0	0	0	0
hsa-miR-1292	16	0.0415122	2	0.0142669	6	0.0156946	16	0.0721806	13	0.0810437	5	0.0359548	18	0.153232	28	0.178319	2	0.0107622	0	0	0	0	2	0.0127711
hsa-miR-129-3p	41	0.106375	57	0.406607	362	0.94691	16	0.0721806	57	0.355346	14	0.100674	15	0.127693	12	0.0764222	8	0.0430489	848	7.31509	49	0.548787	1459	9.31652
hsa-miR-1294	0	0	2	0.0142669	6	0.0156946	0	0	0	0	0	0	0	0	0	0	0	0	0	0	0	0	0	0
hsa-miR-129-5p	275	0.71349	277	1.97597	298	0.7795	10	0.0451129	56	0.349112	8	0.0575277	11	0.0936416	23	0.146476	13	0.0699545	726	6.26269	38	0.42559	952	6.07904
hsa-miR-1296	12	0.0311341	0	0	2	0.00523154	0	0	15	0.093512	0	0	7	0.0595901	0	0	0	0	0	0	0	0	0	0
hsa-miR-1299	7	0.0181616	0	0	0	0	4	0.0180452	372	2.3191	0	0	0	0	0	0	20	0.107622	0	0	4	0.0447989	3	0.0191566
hsa-miR-1300	9	0.0233506	2	0.0142669	0	0	0	0	0	0	0	0	0	0	0	0	0	0	0	0	0	0	0	0
hsa-miR-1301	397	1.03002	68	0.485075	6	0.0156946	199	0.897746	1257	7.83631	361	2.59594	770	6.55491	596	3.79564	226	1.21613	7	0.060384	113	1.26557	132	0.842893
hsa-miR-1302	0	0	0	0	0	0	0	0	2	0.0124683	0	0	0	0	0	0	0	0	0	0	0	0	0	0
hsa-miR-1303	0	0	0	0	0	0	0	0	7	0.0436389	3	0.0215729	2	0.0170257	15	0.0955278	0	0	0	0	0	0	3	0.0191566
hsa-miR-1304	0	0	0	0	0	0	0	0	2	0.0124683	0	0	0	0	0	0	0	0	0	0	0	0	0	0
hsa-miR-1305	0	0	0	0	0	0	0	0	2	0.0124683	24	0.172583	0	0	0	0	0	0	0	0	0	0	0	0
hsa-miR-1306	36	0.0934024	3	0.0214004	12	0.0313893	72	0.324813	36	0.224429	24	0.172583	9	0.0766158	58	0.369374	18	0.0968601	2	0.0172526	18	0.201595	14	0.0893977
hsa-miR-1307	921	2.38954	106	0.756146	309	0.808274	1395	6.29325	4423	27.5736	568	4.08447	303	2.5794	1247	7.94154	166	0.893266	83	0.715982	137	1.53436	328	2.09446
hsa-miR-1308	902	2.34025	127	0.905948	668	1.74734	3989	17.9955	636	3.96491	1664	11.9658	2691	22.9081	2354	14.9915	1267	6.81788	83	0.715982	818	9.16138	595	3.7994
hsa-miR-130a	2692	6.98442	493	3.51679	1806	4.72408	2918	13.1639	1982	12.3561	1276	9.17567	1145	9.74724	0	0	637	3.42777	467	4.02848	361	4.0431	1515	9.67411
hsa-miR-130b	1399	3.62972	203	1.44809	471	1.23203	1127	5.08422	576	3.59086	1638	11.7788	953	8.11276	340	2.1653	412	2.21702	252	2.17382	386	4.32309	639	4.08037
hsa-miR-130b*	16	0.0415122	3	0.0214004	6	0.0156946	7	0.031579	6	0.0374048	0	0	5	0.0425643	3	0.0191056	9	0.0484301	3	0.0258789	7	0.0783981	9	0.0574699
hsa-miR-132	20	0.0518902	20	0.142669	95	0.248498	48	0.216542	43	0.268068	60	0.431458	13	0.110667	37	0.235635	25	0.134528	2	0.0172526	11	0.123197	22	0.140482
hsa-miR-132*	3	0.00778353	4	0.0285338	22	0.057547	2	0.00902258	7	0.0436389	5	0.0359548	3	0.0255386	9	0.0573167	4	0.0215245	0	0	0	0	3	0.0191566
hsa-miR-1323	0	0	0	0	0	0	0	0	2	0.0124683	0	0	0	0	207	1.31828	0	0	0	0	0	0	0	0
hsa-miR-133a	0	0	0	0	0	0	2	0.00902258	0	0	0	0	44	0.374566	0	0	0	0	0	0	0	0	0	0
hsa-miR-134	0	0	18	0.128402	2004	5.24201	0	0	22	0.137151	0	0	0	0	2	0.012737	0	0	0	0	0	0	0	0
hsa-miR-135b	0	0	0	0	0	0	17	0.0766919	133	0.82914	25	0.179774	22	0.187283	19	0.121002	311	1.67353	2	0.0172526	2	0.0223995	9	0.0574699
hsa-miR-135b*	0	0	2	0.0142669	0	0	0	0	28	0.174556	2	0.0143819	7	0.0595901	12	0.0764222	23	0.123766	0	0	0	0	0	0
hsa-miR-136	0	0	0	0	179	0.468223	0	0	0	0	0	0	0	0	0	0	0	0	0	0	0	0	0	0
hsa-miR-136*	0	0	0	0	54	0.141252	0	0	0	0	0	0	0	0	0	0	0	0	0	0	0	0	0	0
hsa-miR-137	0	0	0	0	23	0.0601628	0	0	0	0	0	0	0	0	0	0	0	0	0	0	0	0	0	0
hsa-miR-138	226	0.586359	31	0.221137	547	1.43083	543	2.44963	398	2.48119	145	1.04269	306	2.60494	669	4.26054	59	0.317486	191	1.64762	96	1.07517	70	0.446988
hsa-miR-138-1*	2	0.00518902	0	0	6	0.0156946	0	0	0	0	0	0	2	0.0170257	2	0.012737	0	0	0	0	0	0	0	0
hsa-miR-139-3p	0	0	0	0	0	0	2	0.00902258	0	0	0	0	0	0	0	0	0	0	0	0	0	0	0	0
hsa-miR-139-5p	0	0	2	0.0142669	0	0	16	0.0721806	6	0.0374048	0	0	0	0	0	0	0	0	2	0.0172526	0	0	0	0
hsa-miR-140-3p	74283	192.728	22373	159.597	62220	162.753	38614	174.199	20276	126.403	18246	131.206	15584	132.665	12722	81.0203	106122	571.055	22883	197.395	14571	163.191	22333	142.608
hsa-miR-140-5p	0	0	0	0	4	0.0104631	16	0.0721806	7	0.0436389	10	0.0719096	2	0.0170257	0	0	18	0.0968601	0	0	2	0.0223995	0	0
hsa-miR-142-5p	0	0	2	0.0142669	0	0	0	0	0	0	0	0	0	0	0	0	0	0	0	0	0	0	0	0
hsa-miR-143	16	0.0415122	187	1.33396	14782	38.6663	0	0	0	0	0	0	46	0.391592	2	0.012737	1088	5.85466	14	0.120768	58	0.649584	6	0.0383133
hsa-miR-143*	0	0	2	0.0142669	788	2.06123	0	0	0	0	0	0	0	0	0	0	17	0.091479	0	0	0	0	0	0
hsa-miR-145	0	0	6	0.0428007	1825	4.77378	151	0.681204	0	0	0	0	160	1.36206	2	0.012737	204	1.09775	27	0.23291	0	0	0	0
hsa-miR-145*	0	0	0	0	94	0.245883	0	0	0	0	0	0	0	0	0	0	4	0.0215245	0	0	0	0	0	0
hsa-miR-146a	12583	32.6467	3633	25.9158	49	0.128173	9856	44.4633	28512	177.748	41147	295.887	23219	197.66	16481	104.96	3419	18.398	4053	34.9624	8146	91.233	7319	46.7358
hsa-miR-146a*	0	0	0	0	0	0	6	0.0270677	0	0	7	0.0503368	0	0	2	0.012737	0	0	0	0	0	0	0	0
hsa-miR-146b-3p	0	0	0	0	2	0.00523154	2	0.00902258	0	0	0	0	0	0	0	0	0	0	2	0.0172526	0	0	0	0
hsa-miR-146b-5p	49	0.127131	31	0.221137	579	1.51453	949	4.28121	163	1.01616	154	1.10741	45	0.383079	117	0.745117	181	0.973982	24	0.207031	37	0.41439	24	0.153253
hsa-miR-148a	2091	5.42512	673	4.80081	403	1.05416	3262	14.7158	2237	13.9458	774	5.56581	1569	13.3567	1488	9.47635	3769	20.2814	708	6.10741	1393	15.6012	1590	10.153
hsa-miR-148a*	10	0.0259451	3	0.0214004	2	0.00523154	15	0.0676693	11	0.0685755	4	0.0287639	4	0.0340515	3	0.0191056	12	0.0645734	6	0.0517577	4	0.0447989	13	0.0830121
hsa-miR-148b	961	2.49332	302	2.1543	478	1.25034	648	2.92331	654	4.07712	894	6.42872	1226	10.4368	620	3.94848	773	4.1596	141	1.21631	467	5.23027	1142	7.2923
hsa-miR-148b*	8	0.0207561	3	0.0214004	8	0.0209262	0	0	3	0.0187024	0	0	3	0.0255386	5	0.0318426	4	0.0215245	3	0.0258789	4	0.0447989	7	0.0446988
hsa-miR-149	0	0	0	0	14	0.0366208	2	0.00902258	0	0	0	0	0	0	0	0	2	0.0107622	0	0	0	0	4	0.0255422
hsa-miR-151-3p	7205	18.6934	1907	13.6035	3001	7.84993	1042	4.70076	1412	8.8026	955	6.86737	1428	12.1564	2097	13.3548	1898	10.2134	1221	10.5327	770	8.62379	7273	46.4421
hsa-miR-151-5p	1228	3.18606	195	1.39102	480	1.25557	304	1.37143	360	2.24429	357	2.56717	474	4.0351	704	4.48344	289	1.55514	190	1.63899	207	2.31834	873	5.57458
hsa-miR-152	13015	33.7676	4245	30.2815	31794	83.1659	6404	28.8903	13998	87.2654	3621	26.0385	9157	77.9523	2820	17.9592	1748	9.40619	743	6.40933	638	7.14543	7226	46.142
hsa-miR-154	0	0	0	0	42	0.109862	0	0	0	0	0	0	0	0	0	0	0	0	0	0	0	0	0	0
hsa-miR-154*	0	0	0	0	93	0.243267	0	0	0	0	0	0	0	0	0	0	0	0	0	0	0	0	0	0
hsa-miR-155	21	0.0544847	48	0.342406	404	1.05677	1483	6.69024	914	5.698	0	0	0	0	4	0.0254741	0	0	133	1.1473	9	0.100798	0	0
hsa-miR-155*	0	0	0	0	3	0.00784732	0	0	3	0.0187024	0	0	0	0	0	0	0	0	2	0.0172526	0	0	0	0
hsa-miR-15a	309	0.801704	37	0.263938	173	0.452529	394	1.77745	344	2.14454	684	4.91862	399	3.39664	199	1.26734	134	0.72107	37	0.319173	143	1.60156	139	0.887591
hsa-miR-15a*	0	0	0	0	0	0	7	0.031579	0	0	11	0.0791006	0	0	4	0.0254741	0	0	0	0	0	0	0	0
hsa-miR-15b	602	1.5619	75	0.535009	519	1.35759	2141	9.65867	1070	6.67052	3321	23.8812	1210	10.3006	1197	7.62312	562	3.02419	313	2.70003	713	7.9854	760	4.85302
hsa-miR-15b*	10	0.0259451	0	0	26	0.0680101	115	0.518798	42	0.261834	82	0.589659	29	0.246873	53	0.337531	11	0.0591923	3	0.0258789	9	0.100798	29	0.185181
hsa-miR-16	3862	10.02	416	2.96752	1582	4.13815	4384	19.7775	3157	19.6812	6120	44.0087	3011	25.6323	2007	12.7816	1103	5.93537	687	5.92626	1084	12.1405	1195	7.63073
hsa-miR-16-1*	0	0	0	0	2	0.00523154	2	0.00902258	0	0	2	0.0143819	0	0	0	0	0	0	0	0	0	0	2	0.0127711
hsa-miR-16-2*	5	0.0129726	0	0	5	0.0130789	7	0.031579	7	0.0436389	7	0.0503368	3	0.0255386	5	0.0318426	2	0.0107622	0	0	2	0.0223995	7	0.0446988
hsa-miR-17	447	1.15975	39	0.278205	120	0.313893	481	2.16993	303	1.88894	586	4.21391	1407	11.9776	1216	7.74412	293	1.57667	89	0.76774	60	0.671984	535	3.41627
hsa-miR-17*	653	1.69422	90	0.642011	230	0.601628	366	1.65113	211	1.3154	536	3.85436	537	4.57141	779	4.96108	216	1.16232	127	1.09554	51	0.571186	373	2.38181
hsa-miR-181a	33387	86.6229	3731	26.6149	15853	41.4678	27525	124.173	39200	244.378	6429	46.2307	17924	152.585	12553	79.944	8605	46.3045	1266	10.9209	1172	13.1261	3389	21.6406
hsa-miR-181a*	99	0.256857	14	0.0998683	69	0.180488	142	0.640603	330	2.05726	46	0.330784	106	0.902364	64	0.407585	99	0.532731	0	0	12	0.134397	33	0.210723
hsa-miR-181a-2*	1176	3.05114	252	1.79763	787	2.05861	133	0.600001	369	2.3004	203	1.45977	82	0.698055	75	0.477639	74	0.398203	324	2.79492	375	4.1999	148	0.945061
hsa-miR-181b	18559	48.1515	1645	11.7345	5001	13.0815	13634	61.5069	24051	149.937	3011	21.652	6250	53.2054	6607	42.0768	5264	28.3262	1008	8.6953	697	7.80621	1699	10.849
hsa-miR-181c	24	0.0622682	18	0.128402	96	0.251114	70	0.31579	29	0.18079	122	0.877298	11	0.0936416	10	0.0636852	5	0.0269056	7	0.060384	2	0.0223995	0	0
hsa-miR-181c*	10	0.0259451	2	0.0142669	15	0.0392366	25	0.112782	19	0.118449	10	0.0719096	0	0	9	0.0573167	12	0.0645734	4	0.0345052	0	0	6	0.0383133
hsa-miR-181d	145	0.376204	131	0.934482	518	1.35497	1140	5.14287	500	3.11707	824	5.92535	138	1.17478	191	1.21639	76	0.408965	140	1.20768	61	0.683183	23	0.146868
hsa-miR-182	0	0	0	0	0	0	11	0.0496242	9	0.0561072	96	0.690333	2	0.0170257	133	0.847013	7	0.0376678	17	0.146647	2	0.0223995	31	0.197952
hsa-miR-1826	84	0.217939	0	0	6	0.0156946	36	0.162406	10	0.0623413	2	0.0143819	26	0.221335	4	0.0254741	4	0.0215245	0	0	4	0.0447989	0	0
hsa-miR-1827	0	0	0	0	0	0	0	0	0	0	0	0	0	0	0	0	0	0	2	0.0172526	0	0	0	0
hsa-miR-183	0	0	0	0	0	0	0	0	4	0.0249365	15	0.107864	0	0	34	0.21653	0	0	16	0.138021	0	0	32	0.204338
hsa-miR-183*	0	0	0	0	0	0	0	0	0	0	4	0.0287639	0	0	10	0.0636852	0	0	0	0	0	0	5	0.0319277
hsa-miR-184	87	0.225722	4	0.0285338	5	0.0130789	17	0.0766919	203	1.26553	236	1.69707	274	2.33253	95	0.605009	39	0.209864	15	0.129394	44	0.492788	4	0.0255422
hsa-miR-185	29381	76.2293	8379	59.7712	4189	10.9575	21931	98.9371	33865	211.119	14968	107.634	26854	228.605	29662	188.903	11586	62.3456	6468	55.7948	11875	132.997	6148	39.2584
hsa-miR-185*	297	0.77057	41	0.292471	43	0.112478	142	0.640603	134	0.835374	50	0.359548	76	0.646978	114	0.726011	68	0.365916	69	0.595214	129	1.44476	42	0.268193
hsa-miR-186	683	1.77205	119	0.848881	299	0.782116	1215	5.48121	1055	6.57701	1138	8.18332	940	8.0021	644	4.10133	416	2.23854	155	1.33707	668	7.48142	539	3.44181
hsa-miR-186*	0	0	0	0	0	0	5	0.0225564	0	0	3	0.0215729	4	0.0340515	0	0	0	0	0	0	0	0	2	0.0127711
hsa-miR-187	0	0	0	0	0	0	0	0	6	0.0374048	0	0	21	0.17877	140	0.891593	0	0	0	0	0	0	0	0
hsa-miR-187*	0	0	0	0	0	0	0	0	0	0	0	0	0	0	8	0.0509481	0	0	0	0	0	0	0	0
hsa-miR-188-3p	0	0	0	0	0	0	4	0.0180452	0	0	0	0	0	0	0	0	0	0	0	0	2	0.0223995	0	0
hsa-miR-188-5p	36	0.0934024	2	0.0142669	7	0.0183104	266	1.2	66	0.411453	92	0.661569	90	0.766158	43	0.273846	52	0.279818	4	0.0345052	20	0.223995	10	0.0638555
hsa-miR-18a	27	0.0700518	0	0	12	0.0313893	45	0.203008	23	0.143385	54	0.388312	124	1.0556	129	0.821539	18	0.0968601	12	0.103515	12	0.134397	50	0.319277
hsa-miR-18a*	2	0.00518902	0	0	0	0	6	0.0270677	4	0.0249365	4	0.0287639	22	0.187283	8	0.0509481	0	0	5	0.0431314	0	0	7	0.0446988
hsa-miR-18b	0	0	0	0	0	0	30	0.135339	30	0.187024	59	0.424267	14	0.11918	0	0	0	0	4	0.0345052	17	0.190395	6	0.0383133
hsa-miR-190	0	0	0	0	2	0.00523154	2	0.00902258	0	0	0	0	0	0	0	0	0	0	0	0	0	0	0	0
hsa-miR-190b	0	0	0	0	0	0	0	0	2	0.0124683	0	0	0	0	7	0.0445796	0	0	0	0	0	0	0	0
hsa-miR-191	26524	68.8168	3875	27.6421	11647	30.4659	12252	55.2723	12341	76.9354	6119	44.0015	5197	44.2414	10852	69.1112	10940	58.8694	7553	65.1544	5904	66.1232	6339	40.478
hsa-miR-191*	2	0.00518902	2	0.0142669	6	0.0156946	4	0.0180452	7	0.0436389	0	0	2	0.0170257	5	0.0318426	0	0	0	0	3	0.0335992	0	0
hsa-miR-192	1660	4.30689	1533	10.9356	753	1.96968	1272	5.73836	3432	21.3955	597	4.29301	780	6.64004	2198	13.998	2012	10.8268	517	4.45979	1073	12.0173	555	3.54398
hsa-miR-193a-3p	228	0.591548	37	0.263938	463	1.2111	220	0.992483	229	1.42762	36	0.258875	313	2.66453	127	0.808802	226	1.21613	92	0.793619	31	0.347192	25	0.159639
hsa-miR-193a-5p	1224	3.17568	174	1.24122	2685	7.02335	619	2.79249	1212	7.55577	73	0.52494	557	4.74167	315	2.00608	496	2.66903	253	2.18245	18	0.201595	23	0.146868
hsa-miR-193b	254	0.659006	40	0.285338	663	1.73426	598	2.69775	139	0.866545	765	5.50109	485	4.12874	140	0.891593	288	1.54976	114	0.983397	72	0.80638	41	0.261808
hsa-miR-193b*	853	2.21312	123	0.877414	1846	4.82872	184	0.830077	127	0.791735	146	1.04988	118	1.00452	72	0.458533	344	1.8511	184	1.58724	29	0.324792	32	0.204338
hsa-miR-194	7	0.0181616	7	0.0499342	4	0.0104631	20	0.0902258	48	0.299238	11	0.0791006	13	0.110667	28	0.178319	18	0.0968601	0	0	7	0.0783981	3	0.0191566
hsa-miR-195	5	0.0129726	0	0	92	0.240651	33	0.148872	7	0.0436389	8	0.0575277	3	0.0255386	18	0.114633	0	0	8	0.0690103	4	0.0447989	75	0.478916
hsa-miR-196a	98	0.254262	23	0.164069	0	0	1031	4.65114	5529	34.4685	1650	11.8651	974	8.29154	1057	6.73152	568	3.05647	3	0.0258789	36	0.40319	6	0.0383133
hsa-miR-196a*	0	0	0	0	0	0	0	0	0	0	0	0	0	0	4	0.0254741	0	0	0	0	0	0	0	0
hsa-miR-196b	23	0.0596737	2	0.0142669	3	0.00784732	936	4.22257	1023	6.37752	283	2.03504	523	4.45223	4	0.0254741	0	0	19	0.163899	12	0.134397	21	0.134097
hsa-miR-197	55	0.142698	19	0.135536	45	0.11771	97	0.437595	75	0.46756	54	0.388312	34	0.289438	32	0.203793	64	0.344392	5	0.0431314	123	1.37757	35	0.223494
hsa-miR-199a-5p	0	0	8	0.0570676	250	0.653943	0	0	0	0	0	0	0	0	0	0	0	0	0	0	0	0	0	0
hsa-miR-199b-5p	0	0	4	0.0285338	112	0.292966	17	0.0766919	0	0	0	0	7	0.0595901	0	0	0	0	0	0	0	0	2	0.0127711
hsa-miR-19a	4	0.010378	0	0	0	0	10	0.0451129	4	0.0249365	8	0.0575277	17	0.144719	22	0.140107	5	0.0269056	0	0	0	0	5	0.0319277
hsa-miR-19a*	0	0	0	0	0	0	0	0	2	0.0124683	0	0	0	0	2	0.012737	0	0	0	0	0	0	0	0
hsa-miR-19b	481	1.24796	6	0.0428007	77	0.201414	1265	5.70678	609	3.79659	1272	9.14691	3086	26.2707	1370	8.72487	410	2.20626	35	0.30192	147	1.64636	263	1.6794
hsa-miR-19b-1*	0	0	0	0	0	0	0	0	0	0	2	0.0143819	2	0.0170257	0	0	0	0	0	0	0	0	0	0
hsa-miR-200a	0	0	0	0	0	0	0	0	4	0.0249365	0	0	0	0	3	0.0191056	0	0	0	0	0	0	0	0
hsa-miR-200c	2	0.00518902	0	0	2	0.00523154	7	0.031579	27	0.168322	0	0	24	0.204309	12	0.0764222	15	0.0807168	2	0.0172526	3	0.0335992	3	0.0191566
hsa-miR-203	0	0	0	0	0	0	20	0.0902258	0	0	7	0.0503368	0	0	2	0.012737	0	0	2	0.0172526	0	0	0	0
hsa-miR-204	0	0	3	0.0214004	0	0	0	0	133	0.82914	31	0.22292	345	2.93694	28	0.178319	178	0.957839	47	0.405436	1202	13.4621	0	0
hsa-miR-206	0	0	0	0	11	0.0287735	7	0.031579	0	0	0	0	24	0.204309	0	0	0	0	0	0	0	0	0	0
hsa-miR-20a	199	0.516308	26	0.18547	63	0.164794	203	0.915791	164	1.0224	286	2.05662	581	4.94598	550	3.50268	165	0.887884	55	0.474446	23	0.257594	230	1.46868
hsa-miR-20a*	4	0.010378	0	0	0	0	0	0	0	0	0	0	6	0.0510772	5	0.0318426	0	0	0	0	0	0	3	0.0191566
hsa-miR-20b	131	0.339881	0	0	0	0	839	3.78497	591	3.68437	860	6.18423	311	2.6475	0	0	0	0	42	0.362304	50	0.559986	33	0.210723
hsa-miR-20b*	326	0.84581	8	0.0570676	0	0	338	1.52482	553	3.44748	258	1.85527	104	0.885338	0	0	0	0	189	1.63037	78	0.873579	90	0.574699
hsa-miR-21	58991	153.053	13673	97.5357	115651	302.517	79435	358.354	101268	631.318	96146	691.382	40275	342.856	31522	200.748	73872	397.514	19070	164.503	14112	158.051	12448	79.4873
hsa-miR-21*	517	1.34136	88	0.627744	1212	3.17032	1127	5.08422	1255	7.82384	1564	11.2467	453	3.85633	247	1.57302	541	2.91118	253	2.18245	157	1.75836	109	0.696025
hsa-miR-210	219	0.568198	8	0.0570676	159	0.415908	1243	5.60753	152	0.947588	164	1.17932	46	0.391592	182	1.15907	62	0.333629	12	0.103515	73	0.81758	18	0.11494
hsa-miR-211	1682	4.36397	2452	17.4912	0	0	426	1.92181	7363	45.9019	6185	44.4761	5895	50.1834	812	5.17124	1255	6.7533	1670	14.4059	14133	158.286	3121	19.9293
hsa-miR-212	2	0.00518902	6	0.0428007	12	0.0313893	0	0	0	0	2	0.0143819	0	0	9	0.0573167	2	0.0107622	0	0	0	0	10	0.0638555
hsa-miR-214	0	0	2	0.0142669	222	0.580701	0	0	0	0	0	0	0	0	0	0	0	0	0	0	0	0	0	0
hsa-miR-215	2	0.00518902	0	0	4	0.0104631	10	0.0451129	7	0.0436389	2	0.0143819	0	0	0	0	6	0.0322867	0	0	9	0.100798	3	0.0191566
hsa-miR-217	0	0	0	0	0	0	0	0	3	0.0187024	0	0	0	0	0	0	0	0	0	0	0	0	0	0
hsa-miR-218	0	0	0	0	4	0.0104631	0	0	0	0	0	0	2	0.0170257	0	0	0	0	0	0	0	0	0	0
hsa-miR-219-1-3p	7	0.0181616	0	0	11	0.0287735	13	0.0586467	11	0.0685755	4	0.0287639	13	0.110667	7	0.0445796	22	0.118385	5	0.0431314	2	0.0223995	4	0.0255422
hsa-miR-219-2-3p	0	0	0	0	0	0	0	0	0	0	0	0	0	0	0	0	4	0.0215245	0	0	0	0	0	0
hsa-miR-219-5p	0	0	0	0	0	0	8	0.0360903	9	0.0561072	5	0.0359548	9	0.0766158	6	0.0382111	2	0.0107622	0	0	0	0	4	0.0255422
hsa-miR-22	3021	7.83802	1330	9.48749	8982	23.4949	3103	13.9985	3759	23.4341	3415	24.5571	3034	25.828	1658	10.559	1989	10.703	380	3.27799	954	10.6845	1404	8.96531
hsa-miR-22*	246	0.63825	52	0.370939	534	1.39682	189	0.852633	180	1.12214	205	1.47415	88	0.749133	53	0.337531	113	0.608066	10	0.0862629	29	0.324792	31	0.197952
hsa-miR-221	25893	67.1797	11350	80.9647	183144	479.063	63206	285.14	39296	244.977	16917	121.65	17168	146.149	24809	157.997	26526	142.74	2231	19.2453	3664	41.0358	4029	25.7274
hsa-miR-221*	1133	2.93958	651	4.64388	11602	30.3482	3566	16.0873	1623	10.118	2588	18.6102	1454	12.3777	757	4.82097	4004	21.546	675	5.82275	1810	20.2715	299	1.90928
hsa-miR-222	9711	25.1953	5801	41.3812	76524	200.169	16042	72.3701	8519	53.1086	5902	42.4411	5494	46.7697	6420	40.8859	13258	71.3429	1199	10.3429	2414	27.0361	2244	14.3292
hsa-miR-222*	0	0	0	0	43	0.112478	8	0.0360903	4	0.0249365	0	0	0	0	5	0.0318426	6	0.0322867	0	0	3	0.0335992	0	0
hsa-miR-224	0	0	10	0.0713345	915	2.39343	0	0	122	0.760564	0	0	0	0	5	0.0318426	0	0	0	0	0	0	0	0
hsa-miR-23a	6291	16.3221	1306	9.31629	12567	32.8724	15111	68.1701	7154	44.599	11927	85.7666	7016	59.7263	4085	26.0154	6975	37.5333	1377	11.8784	3377	37.8215	3527	22.5218
hsa-miR-23a*	26	0.0674573	9	0.0642011	112	0.292966	36	0.162406	22	0.137151	18	0.129437	14	0.11918	16	0.101896	27	0.14529	2	0.0172526	2	0.0223995	4	0.0255422
hsa-miR-23b	2187	5.67419	16	0.114135	5639	14.7503	1689	7.61956	294	1.83284	243	1.7474	325	2.76668	417	2.65567	383	2.06097	210	1.81152	422	4.72628	106	0.676868
hsa-miR-23b*	1129	2.9292	33	0.235404	1612	4.21662	176	0.793987	43	0.268068	3	0.0215729	12	0.102154	54	0.3439	79	0.425108	125	1.07829	54	0.604785	6	0.0383133
hsa-miR-24	8702	22.5774	2518	17.962	10767	28.164	13315	60.0678	7880	49.125	6179	44.433	5908	50.294	5105	32.5113	4232	22.7729	1057	9.11799	2541	28.4585	1887	12.0495
hsa-miR-24-2*	0	0	0	0	0	0	3	0.0135339	0	0	2	0.0143819	0	0	0	0	2	0.0107622	0	0	0	0	0	0
hsa-miR-25	25544	66.2742	5925	42.2657	8459	22.1268	34210	154.331	31640	197.248	28935	208.071	36058	306.957	14717	93.7255	22945	123.47	21508	185.534	18240	204.283	20663	131.945
hsa-miR-25*	3643	9.4518	840	5.9921	2090	5.46696	1534	6.92032	2282	14.2263	1941	13.9577	2153	18.3282	1372	8.73761	3690	19.8563	9283	80.0778	1259	14.1005	3991	25.4847
hsa-miR-26a	5242	13.6004	2612	18.6326	6009	15.7182	4260	19.2181	3006	18.7398	2322	16.6974	6277	53.4353	2481	15.8003	2550	13.7219	1255	10.826	3162	35.4135	1870	11.941
hsa-miR-26a-1*	0	0	0	0	3	0.00784732	0	0	0	0	0	0	3	0.0255386	2	0.012737	0	0	0	0	0	0	0	0
hsa-miR-26a-2*	2	0.00518902	0	0	0	0	0	0	0	0	0	0	0	0	0	0	0	0	0	0	0	0	2	0.0127711
hsa-miR-26b	1475	3.8269	742	5.29302	1952	5.10599	3094	13.9579	5071	31.6133	1418	10.1968	2970	25.2832	981	6.24752	1726	9.28781	408	3.51953	1597	17.886	1056	6.74314
hsa-miR-26b*	0	0	0	0	0	0	0	0	2	0.0124683	0	0	0	0	0	0	0	0	0	0	0	0	0	0
hsa-miR-27a	1958	5.08005	649	4.62961	2528	6.61267	5613	25.3219	3081	19.2074	3869	27.8218	2612	22.2356	1647	10.4889	1628	8.76046	346	2.9847	982	10.9981	494	3.15446
hsa-miR-27a*	33	0.0856188	20	0.142669	157	0.410676	58	0.261655	26	0.162087	31	0.22292	15	0.127693	10	0.0636852	24	0.129147	22	0.189778	10	0.111997	22	0.140482
hsa-miR-27b	2088	5.41734	66	0.470808	3587	9.38277	1143	5.1564	417	2.59963	194	1.39505	273	2.32401	340	2.1653	310	1.66815	224	1.93229	436	4.88308	62	0.395904
hsa-miR-27b*	246	0.63825	4	0.0285338	533	1.39421	97	0.437595	27	0.168322	12	0.0862916	23	0.195796	30	0.191056	38	0.204482	74	0.638345	42	0.470388	8	0.0510844
hsa-miR-28-3p	1739	4.51185	299	2.1329	774	2.02461	749	3.37895	281	1.75179	350	2.51684	289	2.46022	139	0.885224	420	2.26007	135	1.16455	382	4.2783	396	2.52868
hsa-miR-28-5p	288	0.747219	64	0.456541	169	0.442065	219	0.987972	107	0.667052	105	0.755051	93	0.791697	39	0.248372	97	0.521968	22	0.189778	86	0.963176	75	0.478916
hsa-miR-296-3p	71	0.18421	0	0	52	0.13602	359	1.61955	59	0.367814	156	1.12179	93	0.791697	23	0.146476	27	0.14529	42	0.362304	0	0	0	0
hsa-miR-296-5p	31	0.0804298	0	0	15	0.0392366	32	0.144361	26	0.162087	14	0.100674	11	0.0936416	7	0.0445796	10	0.0538112	9	0.0776366	0	0	0	0
hsa-miR-299-3p	0	0	2	0.0142669	39	0.102015	0	0	0	0	0	0	0	0	0	0	0	0	0	0	0	0	0	0
hsa-miR-299-5p	0	0	0	0	73	0.190951	0	0	0	0	0	0	0	0	0	0	0	0	0	0	0	0	0	0
hsa-miR-29a	105674	274.172	35611	254.029	113063	295.747	134648	607.436	195413	1218.23	92375	664.265	254467	2166.24	44127	281.024	42890	230.796	127858	1102.94	13202	147.859	14053	89.7361
hsa-miR-29a*	5	0.0129726	2	0.0142669	19	0.0496997	84	0.378948	71	0.442624	37	0.266066	62	0.527798	7	0.0445796	2	0.0107622	19	0.163899	2	0.0223995	0	0
hsa-miR-29b	5523	14.3295	1739	12.4051	4201	10.9889	8067	36.3926	9292	57.9276	6199	44.5768	17764	151.223	2212	14.0872	2507	13.4905	7523	64.8956	1478	16.5532	795	5.07651
hsa-miR-29b-1*	0	0	0	0	37	0.0967836	47	0.212031	101	0.629648	13	0.0934825	62	0.527798	20	0.12737	8	0.0430489	9	0.0776366	0	0	0	0
hsa-miR-29b-2*	0	0	0	0	0	0	5	0.0225564	0	0	0	0	0	0	0	0	2	0.0107622	0	0	0	0	0	0
hsa-miR-29c	189	0.490362	75	0.535009	244	0.638248	456	2.05715	675	4.20804	225	1.61797	538	4.57992	162	1.0317	217	1.1677	121	1.04378	67	0.750382	179	1.14301
hsa-miR-29c*	0	0	0	0	2	0.00523154	4	0.0180452	4	0.0249365	0	0	2	0.0170257	0	0	0	0	0	0	3	0.0335992	0	0
hsa-miR-301a	18	0.0467012	2	0.0142669	4	0.0104631	28	0.126316	67	0.417687	18	0.129437	40	0.340515	22	0.140107	16	0.0860979	0	0	9	0.100798	58	0.370362
hsa-miR-301b	21	0.0544847	6	0.0428007	6	0.0156946	51	0.230076	17	0.10598	16	0.115055	39	0.332002	25	0.159213	13	0.0699545	4	0.0345052	14	0.156796	32	0.204338
hsa-miR-30a	14155	36.7253	2055	14.6592	3628	9.49002	7976	35.982	11058	68.9371	15811	113.696	4974	42.343	4857	30.9319	3549	19.0976	280	2.41536	1245	13.9437	2723	17.3879
hsa-miR-30a*	7055	18.3043	868	6.19184	2558	6.69115	2958	13.3444	4948	30.8465	4144	29.7994	1173	9.9856	1202	7.65496	1999	10.7569	167	1.44059	750	8.39979	1503	9.59748
hsa-miR-30b	59	0.153076	13	0.0927349	24	0.0627785	162	0.730829	168	1.04733	465	3.3438	213	1.81324	323	2.05703	130	0.699545	48	0.414062	106	1.18717	158	1.00892
hsa-miR-30b*	35	0.0908079	14	0.0998683	28	0.0732416	46	0.207519	55	0.342877	131	0.942016	50	0.425643	116	0.738748	74	0.398203	30	0.258789	30	0.335992	54	0.34482
hsa-miR-30c	301	0.780948	63	0.449407	53	0.138636	185	0.834588	263	1.63958	269	1.93437	157	1.33652	131	0.834276	200	1.07622	25	0.215657	124	1.38877	135	0.862049
hsa-miR-30c-1*	27	0.0700518	4	0.0285338	11	0.0287735	7	0.031579	32	0.199492	10	0.0719096	11	0.0936416	16	0.101896	11	0.0591923	3	0.0258789	6	0.0671984	15	0.0957832
hsa-miR-30c-2*	433	1.12342	85	0.606343	163	0.426371	151	0.681204	188	1.17202	423	3.04178	70	0.595901	75	0.477639	206	1.10851	14	0.120768	112	1.25437	130	0.830121
hsa-miR-30d	13263	34.411	2900	20.687	2072	5.41988	9870	44.5264	13607	84.8279	15107	108.634	10593	90.1768	27940	177.936	9839	52.9448	3755	32.3917	3497	39.1654	7484	47.7895
hsa-miR-30d*	7	0.0181616	3	0.0214004	0	0	6	0.0270677	10	0.0623413	10	0.0719096	0	0	16	0.101896	9	0.0484301	0	0	7	0.0783981	2	0.0127711
hsa-miR-30e	1112	2.8851	237	1.69063	179	0.468223	976	4.40302	1585	9.8811	669	4.81076	955	8.12979	1016	6.47041	430	2.31388	151	1.30257	264	2.95673	288	1.83904
hsa-miR-30e*	5044	13.0867	1029	7.34032	1567	4.09891	2193	9.89325	4560	28.4277	1152	8.28399	1707	14.5315	1853	11.8009	2169	11.6716	792	6.83202	1685	18.8715	1393	8.89507
hsa-miR-31	614	1.59303	382	2.72498	3121	8.16382	100	0.451129	310	1.93258	4	0.0287639	0	0	210	1.33739	145	0.780262	2	0.0172526	30	0.335992	0	0
hsa-miR-31*	0	0	0	0	8	0.0209262	0	0	6	0.0374048	0	0	0	0	5	0.0318426	4	0.0215245	0	0	0	0	0	0
hsa-miR-32	94	0.243884	15	0.107002	31	0.0810889	77	0.347369	49	0.305473	52	0.37393	55	0.468208	40	0.254741	15	0.0807168	0	0	25	0.279993	55	0.351205
hsa-miR-32*	0	0	0	0	0	0	9	0.0406016	3	0.0187024	7	0.0503368	5	0.0425643	6	0.0382111	0	0	0	0	4	0.0447989	2	0.0127711
hsa-miR-320a	191581	497.059	32689	233.185	117581	307.565	42503	191.743	18964	118.224	25723	184.973	30630	260.749	14703	93.6363	41326	222.38	31487	271.616	10582	118.515	59875	382.335
hsa-miR-320b	866	2.24685	121	0.863148	418	1.09339	193	0.870679	57	0.355346	132	0.949207	141	1.20031	45	0.286583	166	0.893266	275	2.37223	38	0.42559	866	5.52989
hsa-miR-320c	257	0.666789	27	0.192603	112	0.292966	80	0.360903	21	0.130917	33	0.237302	31	0.263899	13	0.0827907	96	0.516587	38	0.327799	5	0.0559986	59	0.376747
hsa-miR-320d	110	0.285396	13	0.0927349	70	0.183104	15	0.0676693	11	0.0685755	2	0.0143819	2	0.0170257	2	0.012737	9	0.0484301	26	0.224284	2	0.0223995	46	0.293735
hsa-miR-323-3p	0	0	3	0.0214004	305	0.79781	0	0	0	0	0	0	0	0	0	0	0	0	0	0	0	0	0	0
hsa-miR-323-5p	0	0	0	0	22	0.057547	0	0	0	0	0	0	0	0	0	0	0	0	0	0	0	0	0	0
hsa-miR-324-3p	29	0.0752408	0	0	13	0.034005	61	0.275189	75	0.46756	40	0.287639	42	0.357541	53	0.337531	28	0.150671	0	0	8	0.0895978	9	0.0574699
hsa-miR-324-5p	82	0.21275	5	0.0356673	25	0.0653943	239	1.0782	354	2.20688	193	1.38786	190	1.61745	241	1.53481	104	0.559636	9	0.0776366	98	1.09757	87	0.555543
hsa-miR-326	4	0.010378	0	0	2	0.00523154	13	0.0586467	8	0.0498731	3	0.0215729	21	0.17877	27	0.17195	28	0.150671	2	0.0172526	2	0.0223995	2	0.0127711
hsa-miR-328	14	0.0363231	14	0.0998683	36	0.0941678	89	0.401505	91	0.567306	4	0.0287639	20	0.170257	0	0	22	0.118385	5	0.0431314	7	0.0783981	5	0.0319277
hsa-miR-329	0	0	0	0	293	0.766421	0	0	0	0	0	0	0	0	0	0	0	0	0	0	0	0	0	0
hsa-miR-330-3p	5964	15.4737	580	4.1374	1256	3.28541	1669	7.52934	2704	16.8571	649	4.66694	1170	9.96006	1066	6.78884	1078	5.80084	363	3.13134	507	5.67826	1659	10.5936
hsa-miR-330-5p	0	0	0	0	0	0	4	0.0180452	10	0.0623413	2	0.0143819	2	0.0170257	4	0.0254741	0	0	0	0	0	0	0	0
hsa-miR-331-3p	423	1.09748	68	0.485075	415	1.08555	247	1.11429	199	1.24059	91	0.654378	301	2.56237	78	0.496744	529	2.84661	179	1.54411	821	9.19497	2327	14.8592
hsa-miR-331-5p	4	0.010378	0	0	0	0	0	0	5	0.0311707	2	0.0143819	2	0.0170257	0	0	0	0	0	0	0	0	0	0
hsa-miR-335	0	0	0	0	0	0	18	0.0812032	143	0.891481	0	0	62	0.527798	0	0	0	0	57	0.491698	0	0	65	0.415061
hsa-miR-335*	0	0	0	0	0	0	0	0	0	0	0	0	0	0	0	0	0	0	3	0.0258789	0	0	0	0
hsa-miR-337-3p	0	0	0	0	76	0.198799	0	0	0	0	0	0	0	0	0	0	0	0	0	0	0	0	0	0
hsa-miR-337-5p	0	0	0	0	7	0.0183104	0	0	0	0	0	0	0	0	0	0	0	0	0	0	0	0	0	0
hsa-miR-338-3p	6	0.0155671	0	0	0	0	277	1.24963	3	0.0187024	10	0.0719096	216	1.83878	325	2.06977	18	0.0968601	4	0.0345052	2	0.0223995	4	0.0255422
hsa-miR-338-5p	2	0.00518902	0	0	0	0	14	0.063158	0	0	0	0	2	0.0170257	18	0.114633	4	0.0215245	4	0.0345052	2	0.0223995	0	0
hsa-miR-339-3p	155	0.402149	17	0.121269	65	0.170025	203	0.915791	282	1.75803	168	1.20808	119	1.01303	191	1.21639	76	0.408965	12	0.103515	29	0.324792	71	0.453374
hsa-miR-339-5p	18	0.0467012	7	0.0499342	18	0.0470839	109	0.49173	109	0.679521	118	0.848534	109	0.927903	70	0.445796	71	0.382059	13	0.112142	27	0.302393	58	0.370362
hsa-miR-33a	652	1.69162	54	0.385206	130	0.34005	1459	6.58197	800	4.98731	709	5.09839	479	4.07766	515	3.27979	310	1.66815	81	0.698729	41	0.459189	217	1.38566
hsa-miR-33a*	17	0.0441067	0	0	9	0.0235419	37	0.166918	22	0.137151	41	0.29483	23	0.195796	20	0.12737	19	0.102241	2	0.0172526	0	0	9	0.0574699
hsa-miR-33b	17	0.0441067	0	0	5	0.0130789	94	0.424061	52	0.324175	50	0.359548	24	0.204309	121	0.770591	4	0.0215245	0	0	0	0	7	0.0446988
hsa-miR-33b*	0	0	0	0	0	0	4	0.0180452	7	0.0436389	2	0.0143819	2	0.0170257	7	0.0445796	0	0	0	0	0	0	0	0
hsa-miR-340	2645	6.86248	1146	8.17494	649	1.69764	1839	8.29626	3882	24.2009	4376	31.4677	3579	30.4676	2289	14.5775	2746	14.7765	854	7.36685	5504	61.6433	2849	18.1924
hsa-miR-342-3p	300	0.778353	22	0.156936	219	0.572854	78	0.35188	231	1.44008	74	0.532131	78	0.664004	183	1.16544	64	0.344392	53	0.457193	93	1.04157	207	1.32181
hsa-miR-342-5p	13	0.0337286	0	0	6	0.0156946	14	0.063158	22	0.137151	3	0.0215729	8	0.068103	21	0.133739	0	0	2	0.0172526	0	0	5	0.0319277
hsa-miR-345	466	1.20904	52	0.370939	60	0.156946	282	1.27218	169	1.05357	108	0.776624	144	1.22585	65	0.413954	119	0.640353	90	0.776366	55	0.615985	75	0.478916
hsa-miR-34a	42	0.108969	2	0.0142669	47	0.122941	0	0	322	2.00739	2	0.0143819	712	6.06116	171	1.08902	54	0.29058	0	0	3	0.0335992	5	0.0319277
hsa-miR-34a*	21	0.0544847	3	0.0214004	20	0.0523154	0	0	20	0.124683	0	0	32	0.272412	16	0.101896	16	0.0860979	0	0	0	0	0	0
hsa-miR-34b	5	0.0129726	0	0	14	0.0366208	2	0.00902258	11	0.0685755	0	0	0	0	0	0	0	0	0	0	0	0	0	0
hsa-miR-34b*	0	0	0	0	7	0.0183104	11	0.0496242	33	0.205726	0	0	3	0.0255386	0	0	0	0	0	0	0	0	0	0
hsa-miR-34c-3p	0	0	0	0	0	0	3	0.0135339	11	0.0685755	0	0	0	0	0	0	0	0	0	0	0	0	0	0
hsa-miR-34c-5p	983	2.5504	153	1.09142	3734	9.76729	1102	4.97144	3831	23.883	0	0	482	4.1032	111	0.706906	19	0.102241	123	1.06103	160	1.79196	361	2.30518
hsa-miR-361-3p	46	0.119347	15	0.107002	21	0.0549312	32	0.144361	7	0.0436389	25	0.179774	9	0.0766158	8	0.0509481	0	0	19	0.163899	38	0.42559	11	0.070241
hsa-miR-361-5p	136	0.352853	24	0.171203	163	0.426371	1459	6.58197	435	2.71185	492	3.53795	550	4.68208	270	1.7195	209	1.12465	53	0.457193	119	1.33277	186	1.18771
hsa-miR-362-3p	10	0.0259451	4	0.0285338	3	0.00784732	139	0.627069	46	0.28677	144	1.0355	112	0.953441	31	0.197424	65	0.349773	17	0.146647	64	0.716782	5	0.0319277
hsa-miR-362-5p	40	0.10378	2	0.0142669	9	0.0235419	232	1.04662	106	0.660818	75	0.539322	156	1.32801	74	0.47127	54	0.29058	13	0.112142	24	0.268793	15	0.0957832
hsa-miR-363	2900	7.52408	73	0.520742	0	0	9758	44.0211	9318	58.0897	11810	84.9253	3524	29.9994	0	0	3	0.0161434	814	7.0218	1330	14.8956	770	4.91687
hsa-miR-363*	241	0.625277	7	0.0499342	0	0	389	1.75489	690	4.30155	359	2.58156	139	1.18329	0	0	0	0	83	0.715982	64	0.716782	39	0.249036
hsa-miR-365	555	1.43995	141	1.00582	2385	6.23862	396	1.78647	261	1.62711	327	2.35145	507	4.31602	271	1.72587	1540	8.28692	395	3.40738	287	3.21432	255	1.62832
hsa-miR-369-3p	0	0	4	0.0285338	134	0.350513	0	0	0	0	0	0	0	0	0	0	0	0	0	0	0	0	0	0
hsa-miR-369-5p	0	0	0	0	98	0.256346	0	0	0	0	0	0	0	0	0	0	0	0	0	0	0	0	0	0
hsa-miR-370	0	0	2	0.0142669	75	0.196183	0	0	0	0	0	0	0	0	0	0	0	0	0	0	0	0	0	0
hsa-miR-371-5p	0	0	0	0	0	0	0	0	0	0	0	0	0	0	2	0.012737	0	0	0	0	0	0	0	0
hsa-miR-374a	75	0.194588	54	0.385206	70	0.183104	266	1.2	176	1.09721	184	1.32314	237	2.01755	152	0.968015	88	0.473538	30	0.258789	126	1.41117	84	0.536386
hsa-miR-374a*	143	0.371015	89	0.634877	160	0.418524	328	1.4797	217	1.35281	153	1.10022	184	1.56637	167	1.06354	197	1.06008	53	0.457193	188	2.10555	209	1.33458
hsa-miR-374b	528	1.3699	104	0.741879	340	0.889363	1118	5.04362	681	4.24545	672	4.83233	782	6.65706	423	2.69388	740	3.98203	209	1.80289	1057	11.8381	1179	7.52856
hsa-miR-374b*	9	0.0233506	5	0.0356673	11	0.0287735	17	0.0766919	18	0.112214	9	0.0647187	9	0.0766158	7	0.0445796	5	0.0269056	7	0.060384	13	0.145596	20	0.127711
hsa-miR-375	0	0	0	0	0	0	9	0.0406016	327	2.03856	2	0.0143819	11	0.0936416	2	0.012737	0	0	0	0	0	0	12	0.0766266
hsa-miR-376a	0	0	0	0	69	0.180488	0	0	0	0	0	0	0	0	0	0	0	0	0	0	0	0	0	0
hsa-miR-376a*	0	0	0	0	3	0.00784732	0	0	0	0	0	0	0	0	0	0	0	0	0	0	0	0	0	0
hsa-miR-376b	0	0	0	0	94	0.245883	0	0	0	0	2	0.0143819	0	0	0	0	0	0	0	0	0	0	0	0
hsa-miR-376c	0	0	3	0.0214004	415	1.08555	0	0	0	0	0	0	0	0	0	0	0	0	0	0	0	0	0	0
hsa-miR-377	0	0	0	0	12	0.0313893	0	0	0	0	0	0	0	0	0	0	0	0	0	0	0	0	0	0
hsa-miR-377*	0	0	0	0	42	0.109862	0	0	0	0	0	0	0	0	0	0	0	0	0	0	0	0	0	0
hsa-miR-378	158112	410.223	35030	249.885	1803	4.71624	40192	181.318	20201	125.936	49444	355.55	70074	596.531	29141	185.585	7971	42.8929	37069	319.768	12458	139.526	58068	370.796
hsa-miR-378*	6	0.0155671	0	0	0	0	5	0.0225564	2	0.0124683	0	0	10	0.0851287	0	0	2	0.0107622	0	0	3	0.0335992	0	0
hsa-miR-379	0	0	8	0.0570676	918	2.40128	0	0	3	0.0187024	0	0	0	0	0	0	0	0	0	0	0	0	0	0
hsa-miR-379*	0	0	0	0	29	0.0758574	0	0	0	0	0	0	0	0	0	0	0	0	0	0	0	0	0	0
hsa-miR-380	0	0	0	0	11	0.0287735	0	0	2	0.0124683	0	0	0	0	0	0	0	0	0	0	0	0	0	0
hsa-miR-381	0	0	0	0	95	0.248498	0	0	0	0	0	0	0	0	0	0	0	0	0	0	0	0	0	0
hsa-miR-382	0	0	5	0.0356673	1241	3.24617	0	0	0	0	0	0	0	0	0	0	0	0	0	0	0	0	0	0
hsa-miR-383	0	0	0	0	0	0	0	0	0	0	0	0	0	0	0	0	0	0	0	0	0	0	208	1.32819
hsa-miR-409-3p	0	0	9	0.0642011	493	1.28958	0	0	2	0.0124683	0	0	0	0	0	0	0	0	0	0	0	0	0	0
hsa-miR-409-5p	0	0	3	0.0214004	180	0.470839	0	0	0	0	0	0	0	0	0	0	0	0	0	0	0	0	0	0
hsa-miR-410	0	0	0	0	137	0.358361	0	0	3	0.0187024	0	0	0	0	0	0	0	0	0	0	0	0	0	0
hsa-miR-411	0	0	0	0	193	0.504844	0	0	2	0.0124683	0	0	0	0	0	0	0	0	0	0	0	0	0	0
hsa-miR-411*	0	0	0	0	155	0.405445	0	0	0	0	0	0	0	0	0	0	0	0	0	0	0	0	0	0
hsa-miR-421	74	0.191994	16	0.114135	36	0.0941678	364	1.64211	285	1.77673	107	0.769433	307	2.61345	242	1.54118	77	0.414346	52	0.448567	162	1.81436	149	0.951447
hsa-miR-423-3p	3915	10.1575	707	5.04335	1277	3.34034	1828	8.24663	2394	14.9245	1115	8.01793	2252	19.171	941	5.99278	1271	6.8394	853	7.35822	233	2.60954	884	5.64483
hsa-miR-423-5p	130934	339.71	22550	160.859	35457	92.7474	25839	116.567	41920	261.335	20871	150.083	47426	403.731	21186	134.923	30626	164.802	17001	146.656	6589	73.795	12455	79.532
hsa-miR-424	331	0.858783	18	0.128402	2489	6.51066	3707	16.7233	238	1.48372	703	5.05525	639	5.43972	287	1.82776	1460	7.85643	50	0.431314	67	0.750382	114	0.727953
hsa-miR-424*	487	1.26353	24	0.171203	1220	3.19124	565	2.54888	60	0.374048	100	0.719096	101	0.8598	31	0.197424	327	1.75963	32	0.276041	25	0.279993	20	0.127711
hsa-miR-425	138	0.358042	17	0.121269	69	0.180488	498	2.24662	463	2.8864	439	3.15683	286	2.43468	389	2.47735	197	1.06008	88	0.759113	180	2.01595	73	0.466145
hsa-miR-425*	27	0.0700518	6	0.0428007	18	0.0470839	57	0.257143	107	0.667052	0	0	15	0.127693	37	0.235635	8	0.0430489	0	0	0	0	9	0.0574699
hsa-miR-431	0	0	0	0	17	0.0444681	0	0	0	0	0	0	0	0	0	0	0	0	0	0	0	0	0	0
hsa-miR-431*	0	0	0	0	2	0.00523154	0	0	0	0	0	0	0	0	0	0	0	0	0	0	0	0	0	0
hsa-miR-432	0	0	21	0.149802	2882	7.53866	0	0	0	0	0	0	0	0	0	0	0	0	0	0	0	0	0	0
hsa-miR-433	0	0	8	0.0570676	914	2.39082	0	0	0	0	0	0	0	0	0	0	0	0	0	0	0	0	0	0
hsa-miR-449a	0	0	0	0	0	0	0	0	5	0.0311707	2	0.0143819	2	0.0170257	8	0.0509481	0	0	0	0	0	0	0	0
hsa-miR-449b	0	0	0	0	0	0	0	0	0	0	0	0	0	0	2	0.012737	0	0	0	0	0	0	0	0
hsa-miR-450a	5	0.0129726	2	0.0142669	22	0.057547	32	0.144361	5	0.0311707	3	0.0215729	28	0.23836	5	0.0318426	49	0.263675	6	0.0517577	7	0.0783981	2	0.0127711
hsa-miR-450b-3p	0	0	0	0	0	0	4	0.0180452	0	0	0	0	0	0	0	0	0	0	0	0	0	0	0	0
hsa-miR-450b-5p	0	0	0	0	7	0.0183104	12	0.0541355	2	0.0124683	2	0.0143819	8	0.068103	12	0.0764222	8	0.0430489	0	0	3	0.0335992	2	0.0127711
hsa-miR-452	0	0	8	0.0570676	816	2.13447	0	0	262	1.63334	0	0	0	0	7	0.0445796	0	0	0	0	0	0	0	0
hsa-miR-454	42	0.108969	2	0.0142669	4	0.0104631	23	0.10376	40	0.249365	34	0.244493	27	0.229847	22	0.140107	16	0.0860979	8	0.0690103	10	0.111997	63	0.40229
hsa-miR-454*	0	0	0	0	0	0	0	0	2	0.0124683	4	0.0287639	0	0	0	0	0	0	0	0	2	0.0223995	0	0
hsa-miR-455-3p	21	0.0544847	0	0	392	1.02538	166	0.748874	23	0.143385	7	0.0503368	119	1.01303	0	0	67	0.360535	26	0.224284	7	0.0783981	7	0.0446988
hsa-miR-455-5p	13	0.0337286	2	0.0142669	91	0.238035	91	0.410527	15	0.093512	2	0.0143819	87	0.74062	0	0	20	0.107622	2	0.0172526	0	0	0	0
hsa-miR-483-5p	0	0	0	0	12	0.0313893	0	0	0	0	0	0	0	0	0	0	0	0	0	0	0	0	0	0
hsa-miR-484	53	0.137509	7	0.0499342	64	0.167409	27	0.121805	53	0.330409	57	0.409885	39	0.332002	15	0.0955278	91	0.489682	22	0.189778	33	0.369591	38	0.242651
hsa-miR-485-3p	0	0	11	0.078468	649	1.69764	0	0	0	0	0	0	0	0	0	0	0	0	0	0	0	0	0	0
hsa-miR-485-5p	0	0	10	0.0713345	1121	2.93228	0	0	2	0.0124683	0	0	0	0	0	0	0	0	0	0	0	0	0	0
hsa-miR-486-3p	0	0	0	0	361	0.944294	0	0	0	0	0	0	0	0	0	0	0	0	0	0	0	0	0	0
hsa-miR-486-5p	0	0	0	0	458	1.19802	0	0	0	0	0	0	2	0.0170257	0	0	0	0	0	0	0	0	0	0
hsa-miR-487a	0	0	2	0.0142669	21	0.0549312	0	0	0	0	0	0	0	0	0	0	0	0	0	0	0	0	0	0
hsa-miR-487b	0	0	5	0.0356673	548	1.43344	0	0	9	0.0561072	0	0	0	0	0	0	0	0	0	0	0	0	0	0
hsa-miR-490-3p	0	0	3	0.0214004	0	0	0	0	0	0	0	0	0	0	0	0	0	0	0	0	0	0	0	0
hsa-miR-491-3p	0	0	0	0	2	0.00523154	0	0	0	0	0	0	0	0	0	0	2	0.0107622	0	0	0	0	3	0.0191566
hsa-miR-491-5p	2	0.00518902	3	0.0214004	0	0	2	0.00902258	0	0	0	0	0	0	0	0	0	0	0	0	0	0	0	0
hsa-miR-493	0	0	0	0	92	0.240651	0	0	0	0	0	0	0	0	0	0	0	0	0	0	0	0	0	0
hsa-miR-493*	0	0	6	0.0428007	441	1.15356	0	0	0	0	0	0	0	0	0	0	0	0	0	0	0	0	0	0
hsa-miR-494	0	0	6	0.0428007	232	0.606859	0	0	0	0	0	0	0	0	0	0	0	0	0	0	0	0	0	0
hsa-miR-495	0	0	14	0.0998683	1634	4.27417	0	0	2	0.0124683	0	0	0	0	0	0	0	0	0	0	0	0	0	0
hsa-miR-496	0	0	0	0	39	0.102015	0	0	0	0	0	0	0	0	0	0	0	0	0	0	0	0	0	0
hsa-miR-497	3	0.00778353	4	0.0285338	80	0.209262	19	0.0857145	8	0.0498731	8	0.0575277	7	0.0595901	22	0.140107	0	0	0	0	4	0.0447989	56	0.357591
hsa-miR-498	0	0	0	0	0	0	0	0	0	0	0	0	0	0	6	0.0382111	0	0	0	0	0	0	0	0
hsa-miR-499-5p	12	0.0311341	2	0.0142669	9	0.0235419	74	0.333835	16	0.0997461	19	0.136628	23	0.195796	479	3.05052	40	0.215245	11	0.0948892	27	0.302393	2	0.0127711
hsa-miR-500	3	0.00778353	0	0	0	0	26	0.117293	5	0.0311707	24	0.172583	23	0.195796	2	0.012737	3	0.0161434	0	0	4	0.0447989	0	0
hsa-miR-501-3p	66	0.171238	15	0.107002	5	0.0130789	105	0.473685	71	0.442624	74	0.532131	61	0.519285	28	0.178319	73	0.392822	42	0.362304	74	0.82878	12	0.0766266
hsa-miR-501-5p	0	0	0	0	0	0	16	0.0721806	7	0.0436389	2	0.0143819	8	0.068103	0	0	2	0.0107622	2	0.0172526	4	0.0447989	0	0
hsa-miR-502-3p	399	1.03521	83	0.592076	89	0.232804	942	4.24963	438	2.73055	533	3.83278	537	4.57141	252	1.60487	507	2.72823	180	1.55273	295	3.30392	89	0.568314
hsa-miR-503	1265	3.28206	77	0.549276	4120	10.777	3039	13.7098	255	1.5897	210	1.5101	322	2.74114	288	1.83413	1324	7.1246	136	1.17318	41	0.459189	201	1.2835
hsa-miR-504	0	0	0	0	0	0	44	0.198497	39	0.243131	2	0.0143819	6	0.0510772	0	0	5	0.0269056	0	0	6	0.0671984	2	0.0127711
hsa-miR-505	3	0.00778353	0	0	16	0.0418524	27	0.121805	6	0.0374048	9	0.0647187	10	0.0851287	9	0.0573167	2	0.0107622	0	0	2	0.0223995	0	0
hsa-miR-505*	91	0.2361	24	0.171203	45	0.11771	11	0.0496242	15	0.093512	0	0	5	0.0425643	14	0.0891593	10	0.0538112	5	0.0431314	8	0.0895978	37	0.236265
hsa-miR-506	0	0	0	0	0	0	0	0	0	0	0	0	0	0	2	0.012737	2	0.0107622	0	0	0	0	0	0
hsa-miR-507	0	0	0	0	0	0	4	0.0180452	0	0	0	0	6	0.0510772	0	0	2	0.0107622	0	0	0	0	0	0
hsa-miR-508-3p	4583	11.8906	1038	7.40452	5	0.0130789	3266	14.7339	752	4.68807	0	0	4977	42.3686	911	5.80172	4217	22.6922	439	3.78694	428	4.79348	25	0.159639
hsa-miR-508-5p	2078	5.39139	365	2.60371	0	0	225	1.01504	71	0.442624	0	0	373	3.1753	94	0.598641	662	3.5623	69	0.595214	26	0.291193	0	0
hsa-miR-509-3-5p	11631	30.1767	2001	14.274	4	0.0104631	5215	23.5264	1408	8.77766	3	0.0215729	7779	66.2216	1309	8.33639	8028	43.1996	1725	14.8803	449	5.02868	75	0.478916
hsa-miR-509-3p	2836	7.35803	455	3.24572	0	0	6430	29.0076	1329	8.28516	3	0.0215729	7880	67.0814	1602	10.2024	2629	14.147	177	1.52685	204	2.28474	9	0.0574699
hsa-miR-509-5p	2475	6.42141	353	2.51811	0	0	1979	8.92784	436	2.71808	0	0	3359	28.5947	660	4.20322	2012	10.8268	347	2.99332	150	1.67996	8	0.0510844
hsa-miR-510	89	0.230911	10	0.0713345	0	0	70	0.31579	19	0.118449	0	0	114	0.970467	12	0.0764222	74	0.398203	14	0.120768	5	0.0559986	0	0
hsa-miR-512-3p	0	0	0	0	0	0	0	0	0	0	0	0	0	0	12	0.0764222	0	0	0	0	0	0	0	0
hsa-miR-513a-3p	5	0.0129726	0	0	0	0	159	0.717295	22	0.137151	0	0	195	1.66001	24	0.152844	24	0.129147	0	0	0	0	0	0
hsa-miR-513a-5p	173	0.44885	14	0.0998683	0	0	180	0.812032	39	0.243131	0	0	412	3.5073	31	0.197424	191	1.02779	10	0.0862629	10	0.111997	0	0
hsa-miR-513b	27	0.0700518	5	0.0356673	0	0	87	0.392482	4	0.0249365	0	0	149	1.26842	29	0.184687	60	0.322867	2	0.0172526	6	0.0671984	0	0
hsa-miR-513c	92	0.238695	33	0.235404	0	0	251	1.13233	29	0.18079	0	0	493	4.19684	60	0.382111	142	0.764119	4	0.0345052	26	0.291193	0	0
hsa-miR-514	122	0.31653	40	0.285338	2	0.00523154	353	1.59248	66	0.411453	0	0	455	3.87336	84	0.534956	263	1.41523	16	0.138021	17	0.190395	0	0
hsa-miR-515-5p	0	0	0	0	0	0	0	0	0	0	0	0	0	0	2	0.012737	0	0	0	0	0	0	0	0
hsa-miR-516a-5p	0	0	0	0	0	0	2	0.00902258	0	0	0	0	0	0	4	0.0254741	0	0	0	0	2	0.0223995	0	0
hsa-miR-516b	0	0	0	0	0	0	0	0	0	0	0	0	0	0	113	0.719643	0	0	0	0	0	0	0	0
hsa-miR-517a	0	0	0	0	0	0	0	0	0	0	0	0	0	0	18	0.114633	0	0	0	0	0	0	0	0
hsa-miR-517b	0	0	0	0	0	0	0	0	0	0	0	0	0	0	2	0.012737	0	0	0	0	0	0	0	0
hsa-miR-517c	0	0	0	0	0	0	0	0	0	0	0	0	0	0	2	0.012737	0	0	0	0	0	0	0	0
hsa-miR-518a-3p	0	0	0	0	0	0	0	0	0	0	0	0	0	0	3	0.0191056	0	0	0	0	0	0	0	0
hsa-miR-518b	0	0	0	0	0	0	0	0	0	0	0	0	0	0	14	0.0891593	0	0	0	0	0	0	0	0
hsa-miR-518c*	0	0	0	0	0	0	0	0	0	0	0	0	0	0	2	0.012737	0	0	0	0	0	0	0	0
hsa-miR-518f	0	0	0	0	0	0	0	0	0	0	0	0	0	0	2	0.012737	0	0	0	0	0	0	0	0
hsa-miR-519a	0	0	0	0	0	0	4	0.0180452	0	0	0	0	0	0	4	0.0254741	0	0	0	0	0	0	0	0
hsa-miR-519b-3p	0	0	0	0	0	0	0	0	0	0	0	0	0	0	2	0.012737	0	0	0	0	0	0	0	0
hsa-miR-519d	0	0	0	0	0	0	0	0	0	0	0	0	0	0	6	0.0382111	0	0	0	0	0	0	0	0
hsa-miR-520a-3p	0	0	0	0	0	0	0	0	0	0	0	0	0	0	10	0.0636852	0	0	0	0	0	0	0	0
hsa-miR-520a-5p	0	0	0	0	0	0	0	0	0	0	0	0	0	0	3	0.0191056	0	0	0	0	0	0	0	0
hsa-miR-520g	0	0	0	0	0	0	0	0	0	0	0	0	0	0	4	0.0254741	0	0	0	0	0	0	0	0
hsa-miR-521	0	0	0	0	0	0	3	0.0135339	0	0	0	0	0	0	0	0	0	0	0	0	0	0	0	0
hsa-miR-522	0	0	0	0	0	0	0	0	0	0	0	0	0	0	2	0.012737	0	0	0	0	0	0	0	0
hsa-miR-524-5p	0	0	0	0	0	0	0	0	0	0	0	0	0	0	9	0.0573167	0	0	0	0	0	0	0	0
hsa-miR-525-3p	0	0	0	0	0	0	0	0	0	0	0	0	0	0	3	0.0191056	0	0	0	0	0	0	0	0
hsa-miR-525-5p	0	0	0	0	0	0	0	0	0	0	0	0	0	0	4	0.0254741	0	0	0	0	0	0	0	0
hsa-miR-526b	0	0	0	0	0	0	0	0	0	0	0	0	0	0	6	0.0382111	0	0	0	0	0	0	0	0
hsa-miR-532-3p	70	0.181616	5	0.0356673	25	0.0653943	185	0.834588	79	0.492497	89	0.639996	84	0.715081	56	0.356637	279	1.50133	38	0.327799	86	0.963176	22	0.140482
hsa-miR-532-5p	1094	2.83839	171	1.21982	608	1.59039	4948	22.3219	1970	12.2812	1696	12.1959	2304	19.6137	1145	7.29195	1460	7.85643	627	5.40868	664	7.43662	362	2.31157
hsa-miR-539	0	0	0	0	3	0.00784732	0	0	0	0	0	0	0	0	0	0	0	0	0	0	0	0	0	0
hsa-miR-541*	0	0	0	0	10	0.0261577	0	0	2	0.0124683	0	0	0	0	0	0	0	0	0	0	0	0	0	0
hsa-miR-542-3p	104	0.269829	20	0.142669	231	0.604243	281	1.26767	76	0.473794	28	0.201347	208	1.77068	97	0.617746	197	1.06008	16	0.138021	33	0.369591	31	0.197952
hsa-miR-542-5p	0	0	0	0	3	0.00784732	6	0.0270677	0	0	0	0	4	0.0340515	0	0	2	0.0107622	2	0.0172526	0	0	0	0
hsa-miR-543	0	0	36	0.256804	2643	6.91349	0	0	2	0.0124683	0	0	0	0	0	0	0	0	0	0	0	0	0	0
hsa-miR-548a-3p	17	0.0441067	0	0	0	0	45	0.203008	20	0.124683	97	0.697524	37	0.314976	30	0.191056	15	0.0807168	6	0.0517577	15	0.167996	16	0.102169
hsa-miR-548b-3p	0	0	0	0	0	0	0	0	0	0	0	0	0	0	0	0	0	0	0	0	0	0	3	0.0191566
hsa-miR-548b-5p	0	0	0	0	0	0	0	0	0	0	0	0	0	0	2	0.012737	0	0	0	0	0	0	0	0
hsa-miR-548c-5p	0	0	0	0	0	0	2	0.00902258	0	0	2	0.0143819	0	0	0	0	0	0	0	0	2	0.0223995	0	0
hsa-miR-548d-5p	0	0	0	0	0	0	0	0	0	0	2	0.0143819	0	0	2	0.012737	0	0	0	0	6	0.0671984	0	0
hsa-miR-548e	72	0.186805	16	0.114135	30	0.0784732	21	0.094737	18	0.112214	14	0.100674	12	0.102154	13	0.0827907	11	0.0591923	17	0.146647	32	0.358391	56	0.357591
hsa-miR-548h	0	0	0	0	27	0.0706258	0	0	0	0	0	0	0	0	0	0	0	0	0	0	0	0	0	0
hsa-miR-548i	2	0.00518902	0	0	0	0	0	0	0	0	0	0	0	0	0	0	0	0	0	0	0	0	0	0
hsa-miR-548j	20	0.0518902	3	0.0214004	24	0.0627785	14	0.063158	9	0.0561072	9	0.0647187	8	0.068103	12	0.0764222	0	0	3	0.0258789	0	0	7	0.0446988
hsa-miR-548k	143	0.371015	10	0.0713345	13	0.034005	13	0.0586467	60	0.374048	28	0.201347	48	0.408618	35	0.222898	19	0.102241	18	0.155273	67	0.750382	17	0.108554
hsa-miR-548l	0	0	0	0	0	0	0	0	8	0.0498731	5	0.0359548	2	0.0170257	4	0.0254741	0	0	0	0	9	0.100798	0	0
hsa-miR-548n	3	0.00778353	0	0	0	0	6	0.0270677	4	0.0249365	0	0	0	0	0	0	0	0	0	0	2	0.0223995	0	0
hsa-miR-548o	11	0.0285396	0	0	5	0.0130789	2	0.00902258	5	0.0311707	2	0.0143819	0	0	4	0.0254741	2	0.0107622	0	0	0	0	3	0.0191566
hsa-miR-548p	2	0.00518902	0	0	2	0.00523154	0	0	2	0.0124683	0	0	2	0.0170257	0	0	0	0	0	0	2	0.0223995	0	0
hsa-miR-549	0	0	0	0	10	0.0261577	2	0.00902258	0	0	0	0	0	0	0	0	0	0	0	0	0	0	0	0
hsa-miR-550	0	0	0	0	0	0	2	0.00902258	0	0	2	0.0143819	0	0	0	0	0	0	0	0	0	0	0	0
hsa-miR-550*	11	0.0285396	0	0	2	0.00523154	18	0.0812032	14	0.0872779	17	0.122246	23	0.195796	5	0.0318426	8	0.0430489	4	0.0345052	4	0.0447989	5	0.0319277
hsa-miR-551b	0	0	0	0	2	0.00523154	89	0.401505	2	0.0124683	0	0	27	0.229847	9	0.0573167	2	0.0107622	0	0	0	0	3	0.0191566
hsa-miR-551b*	0	0	0	0	0	0	4	0.0180452	0	0	0	0	6	0.0510772	5	0.0318426	10	0.0538112	0	0	0	0	3	0.0191566
hsa-miR-556-3p	2	0.00518902	0	0	0	0	0	0	5	0.0311707	0	0	0	0	3	0.0191056	0	0	3	0.0258789	10	0.111997	0	0
hsa-miR-561	0	0	0	0	0	0	3	0.0135339	0	0	4	0.0287639	0	0	0	0	0	0	0	0	0	0	0	0
hsa-miR-570	0	0	0	0	0	0	0	0	0	0	4	0.0287639	0	0	0	0	0	0	0	0	3	0.0335992	0	0
hsa-miR-573	0	0	0	0	2	0.00523154	4	0.0180452	2	0.0124683	3	0.0215729	2	0.0170257	6	0.0382111	0	0	2	0.0172526	2	0.0223995	0	0
hsa-miR-574-3p	356	0.923646	11	0.078468	788	2.06123	637	2.87369	234	1.45879	144	1.0355	233	1.9835	149	0.948909	249	1.3399	11	0.0948892	54	0.604785	129	0.823736
hsa-miR-574-5p	8	0.0207561	0	0	14	0.0366208	276	1.24512	101	0.629648	98	0.704715	30	0.255386	38	0.242004	13	0.0699545	0	0	14	0.156796	0	0
hsa-miR-576-3p	21	0.0544847	0	0	10	0.0261577	16	0.0721806	12	0.0748096	18	0.129437	27	0.229847	17	0.108265	13	0.0699545	0	0	7	0.0783981	10	0.0638555
hsa-miR-576-5p	21	0.0544847	0	0	24	0.0627785	13	0.0586467	15	0.093512	30	0.215729	18	0.153232	13	0.0827907	8	0.0430489	5	0.0431314	31	0.347192	10	0.0638555
hsa-miR-577	0	0	0	0	0	0	0	0	0	0	5	0.0359548	0	0	0	0	0	0	0	0	0	0	0	0
hsa-miR-582-3p	151	0.391771	16	0.114135	0	0	22	0.0992483	40	0.249365	2	0.0143819	89	0.757645	74	0.47127	0	0	7	0.060384	51	0.571186	54	0.34482
hsa-miR-582-5p	32	0.0830243	2	0.0142669	0	0	18	0.0812032	34	0.211961	0	0	87	0.74062	39	0.248372	8	0.0430489	0	0	33	0.369591	32	0.204338
hsa-miR-584	1217	3.15752	179	1.27689	80	0.209262	1670	7.53385	2006	12.5057	1649	11.8579	2550	21.7078	2496	15.8958	2433	13.0923	187	1.61312	1122	12.5661	650	4.15061
hsa-miR-585	0	0	0	0	5	0.0130789	0	0	0	0	0	0	0	0	0	0	0	0	0	0	0	0	0	0
hsa-miR-589	101	0.262046	6	0.0428007	22	0.057547	44	0.198497	211	1.3154	48	0.345166	41	0.349028	43	0.273846	50	0.269056	10	0.0862629	39	0.436789	19	0.121325
hsa-miR-589*	14	0.0363231	0	0	7	0.0183104	24	0.108271	37	0.230663	20	0.143819	13	0.110667	6	0.0382111	14	0.0753356	0	0	8	0.0895978	6	0.0383133
hsa-miR-590-3p	3	0.00778353	0	0	6	0.0156946	11	0.0496242	18	0.112214	8	0.0575277	24	0.204309	4	0.0254741	9	0.0484301	0	0	5	0.0559986	3	0.0191566
hsa-miR-590-5p	8	0.0207561	2	0.0142669	9	0.0235419	31	0.13985	21	0.130917	30	0.215729	62	0.527798	12	0.0764222	12	0.0645734	8	0.0690103	23	0.257594	7	0.0446988
hsa-miR-598	112	0.290585	17	0.121269	18	0.0470839	7	0.031579	8	0.0498731	86	0.618423	680	5.78875	198	1.26097	298	1.60357	8	0.0690103	35	0.39199	168	1.07277
hsa-miR-605	3	0.00778353	0	0	0	0	0	0	0	0	0	0	0	0	0	0	0	0	0	0	0	0	0	0
hsa-miR-615-3p	21	0.0544847	2	0.0142669	0	0	0	0	0	0	0	0	2	0.0170257	2	0.012737	10	0.0538112	0	0	0	0	6	0.0383133
hsa-miR-615-5p	32	0.0830243	7	0.0499342	0	0	19	0.0857145	12	0.0748096	27	0.194156	9	0.0766158	20	0.12737	14	0.0753356	2	0.0172526	0	0	0	0
hsa-miR-616	6	0.0155671	0	0	0	0	0	0	0	0	0	0	0	0	0	0	0	0	0	0	0	0	0	0
hsa-miR-616*	0	0	2	0.0142669	0	0	2	0.00902258	0	0	0	0	0	0	0	0	0	0	0	0	0	0	0	0
hsa-miR-618	0	0	0	0	3	0.00784732	0	0	0	0	0	0	0	0	0	0	0	0	0	0	0	0	0	0
hsa-miR-624*	0	0	0	0	2	0.00523154	0	0	2	0.0124683	0	0	2	0.0170257	0	0	0	0	0	0	0	0	0	0
hsa-miR-625	51	0.13232	4	0.0285338	15	0.0392366	17	0.0766919	25	0.155853	21	0.15101	20	0.170257	5	0.0318426	24	0.129147	7	0.060384	14	0.156796	3	0.0191566
hsa-miR-625*	65	0.168643	6	0.0428007	31	0.0810889	3	0.0135339	9	0.0561072	16	0.115055	12	0.102154	0	0	32	0.172196	2	0.0172526	26	0.291193	11	0.070241
hsa-miR-627	0	0	0	0	0	0	0	0	0	0	0	0	2	0.0170257	0	0	0	0	0	0	0	0	0	0
hsa-miR-628-5p	3	0.00778353	0	0	2	0.00523154	22	0.0992483	17	0.10598	8	0.0575277	16	0.136206	2	0.012737	12	0.0645734	8	0.0690103	23	0.257594	2	0.0127711
hsa-miR-629	72	0.186805	5	0.0356673	53	0.138636	133	0.600001	94	0.586009	100	0.719096	123	1.04708	50	0.318426	52	0.279818	24	0.207031	44	0.492788	18	0.11494
hsa-miR-629*	0	0	0	0	0	0	2	0.00902258	0	0	2	0.0143819	0	0	0	0	0	0	0	0	0	0	0	0
hsa-miR-641	12	0.0311341	0	0	2	0.00523154	2	0.00902258	20	0.124683	29	0.208538	10	0.0851287	16	0.101896	5	0.0269056	15	0.129394	10	0.111997	8	0.0510844
hsa-miR-643	0	0	0	0	0	0	0	0	0	0	0	0	0	0	0	0	0	0	0	0	0	0	2	0.0127711
hsa-miR-651	2	0.00518902	0	0	0	0	14	0.063158	3	0.0187024	0	0	9	0.0766158	3	0.0191056	2	0.0107622	0	0	0	0	0	0
hsa-miR-652	92	0.238695	6	0.0428007	36	0.0941678	977	4.40753	865	5.39253	1202	8.64354	1214	10.3346	463	2.94862	169	0.909409	69	0.595214	286	3.20312	89	0.568314
hsa-miR-654-3p	0	0	0	0	210	0.549312	0	0	0	0	0	0	0	0	0	0	0	0	0	0	0	0	0	0
hsa-miR-654-5p	0	0	0	0	50	0.130789	0	0	0	0	0	0	0	0	0	0	0	0	0	0	0	0	0	0
hsa-miR-655	0	0	0	0	227	0.59378	0	0	0	0	0	0	0	0	0	0	0	0	0	0	0	0	0	0
hsa-miR-656	0	0	0	0	11	0.0287735	0	0	0	0	0	0	0	0	0	0	0	0	0	0	0	0	0	0
hsa-miR-660	154	0.399555	34	0.242537	47	0.122941	1810	8.16543	532	3.31656	1163	8.36309	1227	10.4453	340	2.1653	456	2.45379	65	0.560709	413	4.62549	83	0.530001
hsa-miR-664	24	0.0622682	4	0.0285338	53	0.138636	22	0.0992483	32	0.199492	15	0.107864	38	0.323489	9	0.0573167	78	0.419727	8	0.0690103	67	0.750382	46	0.293735
hsa-miR-664*	195	0.505929	73	0.520742	94	0.245883	104	0.469174	139	0.866545	41	0.29483	105	0.893851	35	0.222898	140	0.753356	19	0.163899	85	0.951977	62	0.395904
hsa-miR-665	0	0	0	0	103	0.269425	0	0	0	0	0	0	0	0	0	0	0	0	0	0	0	0	0	0
hsa-miR-668	0	0	0	0	6	0.0156946	0	0	0	0	0	0	0	0	0	0	0	0	0	0	0	0	0	0
hsa-miR-671-3p	5	0.0129726	2	0.0142669	5	0.0130789	16	0.0721806	11	0.0685755	12	0.0862916	3	0.0255386	0	0	6	0.0322867	0	0	3	0.0335992	3	0.0191566
hsa-miR-671-5p	3	0.00778353	0	0	9	0.0235419	260	1.17293	51	0.317941	129	0.927634	169	1.43867	21	0.133739	15	0.0807168	0	0	2	0.0223995	2	0.0127711
hsa-miR-675	0	0	0	0	0	0	0	0	0	0	0	0	0	0	124	0.789696	10	0.0538112	0	0	0	0	0	0
hsa-miR-7	149	0.386582	44	0.313872	133	0.347898	579	2.61204	407	2.53729	293	2.10695	333	2.83479	1617	10.2979	225	1.21075	71	0.612467	392	4.39029	202	1.28988
hsa-miR-708	0	0	2	0.0142669	160	0.418524	8	0.0360903	26	0.162087	4	0.0287639	6	0.0510772	0	0	45	0.24215	57	0.491698	2	0.0223995	0	0
hsa-miR-708*	0	0	2	0.0142669	17	0.0444681	0	0	0	0	0	0	0	0	0	0	5	0.0269056	2	0.0172526	0	0	0	0
hsa-miR-7-1*	10	0.0259451	2	0.0142669	8	0.0209262	18	0.0812032	18	0.112214	25	0.179774	23	0.195796	14	0.0891593	11	0.0591923	4	0.0345052	18	0.201595	23	0.146868
hsa-miR-720	108	0.280207	26	0.18547	200	0.523154	161	0.726317	104	0.64835	145	1.04269	139	1.18329	131	0.834276	53	0.285199	34	0.293294	36	0.40319	52	0.332049
hsa-miR-744	2323	6.02705	491	3.50252	1184	3.09707	1722	7.76844	3934	24.5251	496	3.56672	2178	18.541	3134	19.9589	1324	7.1246	102	0.879882	359	4.0207	598	3.81856
hsa-miR-760	135	0.350259	20	0.142669	56	0.146483	418	1.88572	436	2.71808	126	0.906062	315	2.68155	508	3.23521	281	1.51209	88	0.759113	111	1.24317	98	0.625784
hsa-miR-765	6	0.0155671	0	0	0	0	2	0.00902258	2	0.0124683	0	0	3	0.0255386	0	0	2	0.0107622	4	0.0345052	0	0	4	0.0255422
hsa-miR-766	2	0.00518902	0	0	4	0.0104631	58	0.261655	9	0.0561072	56	0.402694	11	0.0936416	7	0.0445796	0	0	2	0.0172526	8	0.0895978	5	0.0319277
hsa-miR-767-3p	0	0	0	0	0	0	2	0.00902258	0	0	0	0	0	0	0	0	2	0.0107622	0	0	3	0.0335992	0	0
hsa-miR-767-5p	0	0	0	0	2	0.00523154	398	1.79549	185	1.15331	43	0.309211	0	0	80	0.509481	71	0.382059	0	0	52	0.582386	0	0
hsa-miR-768-3p	2	0.00518902	0	0	0	0	0	0	0	0	0	0	0	0	0	0	4	0.0215245	0	0	0	0	2	0.0127711
hsa-miR-768-5p	275	0.71349	46	0.328139	135	0.353129	55	0.248121	73	0.455092	36	0.258875	18	0.153232	28	0.178319	39	0.209864	46	0.396809	19	0.212795	32	0.204338
hsa-miR-769-3p	0	0	0	0	2	0.00523154	20	0.0902258	18	0.112214	37	0.266066	15	0.127693	17	0.108265	3	0.0161434	0	0	3	0.0335992	6	0.0383133
hsa-miR-769-5p	41	0.106375	2	0.0142669	17	0.0444681	58	0.261655	87	0.54237	58	0.417076	53	0.451182	62	0.394848	24	0.129147	4	0.0345052	7	0.0783981	39	0.249036
hsa-miR-873	21	0.0544847	16	0.114135	0	0	272	1.22707	0	0	1265	9.09657	227	1.93242	47	0.29932	122	0.656496	122	1.05241	107	1.19837	73	0.466145
hsa-miR-874	0	0	0	0	0	0	15	0.0676693	3	0.0187024	0	0	4	0.0340515	0	0	0	0	0	0	0	0	0	0
hsa-miR-876-3p	0	0	0	0	0	0	5	0.0225564	0	0	32	0.230111	8	0.068103	0	0	4	0.0215245	0	0	5	0.0559986	0	0
hsa-miR-876-5p	0	0	0	0	0	0	36	0.162406	0	0	131	0.942016	15	0.127693	2	0.012737	21	0.113003	2	0.0172526	12	0.134397	5	0.0319277
hsa-miR-877	916	2.37657	81	0.57781	346	0.905057	638	2.8782	635	3.95868	186	1.33752	220	1.87283	522	3.32437	279	1.50133	57	0.491698	59	0.660784	320	2.04338
hsa-miR-877*	0	0	0	0	0	0	2	0.00902258	0	0	0	0	0	0	0	0	0	0	0	0	0	0	0	0
hsa-miR-885-3p	0	0	0	0	0	0	0	0	0	0	0	0	0	0	2	0.012737	0	0	11	0.0948892	0	0	0	0
hsa-miR-886-3p	120	0.311341	16	0.114135	310	0.810889	383	1.72782	165	1.02863	0	0	722	6.14629	0	0	0	0	231	1.99267	420	4.70388	0	0
hsa-miR-886-5p	11214	29.0948	1053	7.51152	19826	51.8603	12463	56.2242	13935	86.8727	13	0.0934825	46147	392.843	2	0.012737	0	0	7801	67.2937	9753	109.231	3	0.0191566
hsa-miR-887	25	0.0648628	0	0	65	0.170025	408	1.84061	197	1.22812	648	4.65975	169	1.43867	2	0.012737	35	0.188339	30	0.258789	36	0.40319	0	0
hsa-miR-889	0	0	43	0.306738	2175	5.6893	2	0.00902258	23	0.143385	0	0	0	0	0	0	0	0	0	0	0	0	0	0
hsa-miR-9	2	0.00518902	79	0.563543	0	0	1080	4.87219	1303	8.12308	93	0.66876	98	0.834261	243	1.54755	256	1.37757	17	0.146647	123	1.37757	414	2.64362
hsa-miR-9*	4	0.010378	12	0.0856014	0	0	120	0.541355	106	0.660818	15	0.107864	13	0.110667	30	0.191056	46	0.247531	2	0.0172526	23	0.257594	120	0.766266
hsa-miR-923	391	1.01445	2	0.0142669	0	0	0	0	0	0	6	0.0431458	70	0.595901	0	0	0	0	0	0	105	1.17597	0	0
hsa-miR-92a	40926	106.183	4969	35.4461	14971	39.1607	22104	99.7175	28593	178.253	22853	164.335	37847	322.187	39146	249.302	10421	56.0766	9913	85.5124	3698	41.4166	13102	83.6635
hsa-miR-92a-1*	905	2.34803	284	2.0259	411	1.07508	87	0.392482	209	1.30293	114	0.81977	347	2.95397	722	4.59807	234	1.25918	167	1.44059	18	0.201595	282	1.80072
hsa-miR-92a-2*	101	0.262046	2	0.0142669	0	0	47	0.212031	116	0.72316	33	0.237302	11	0.0936416	0	0	0	0	37	0.319173	4	0.0447989	15	0.0957832
hsa-miR-92b	1253	3.25092	366	2.61084	5004	13.0893	1475	6.65415	2365	14.7437	915	6.57973	595	5.06516	1445	9.20251	779	4.19189	1210	10.4378	336	3.76311	1312	8.37784
hsa-miR-92b*	494	1.28169	92	0.656278	1176	3.07615	446	2.01203	983	6.12815	457	3.28627	225	1.9154	575	3.6619	190	1.02241	353	3.04508	183	2.04955	273	1.74325
hsa-miR-93	1654	4.29132	184	1.31256	742	1.9409	8752	39.4828	7491	46.6999	6415	46.13	11539	98.23	4933	31.4159	2820	15.1748	1160	10.0065	1169	13.0925	2296	14.6612
hsa-miR-93*	6	0.0155671	0	0	3	0.00784732	23	0.10376	18	0.112214	8	0.0575277	21	0.17877	15	0.0955278	17	0.091479	5	0.0431314	5	0.0559986	20	0.127711
hsa-miR-933	0	0	0	0	0	0	2	0.00902258	0	0	0	0	4	0.0340515	2	0.012737	0	0	0	0	0	0	0	0
hsa-miR-935	0	0	0	0	0	0	0	0	0	0	20	0.143819	0	0	0	0	0	0	0	0	0	0	2	0.0127711
hsa-miR-940	31	0.0804298	0	0	36	0.0941678	161	0.726317	81	0.504965	61	0.438649	39	0.332002	52	0.331163	2	0.0107622	0	0	0	0	29	0.185181
hsa-miR-941	122	0.31653	42	0.299605	92	0.240651	227	1.02406	170	1.0598	91	0.654378	65	0.553337	120	0.764222	46	0.247531	33	0.284668	37	0.41439	58	0.370362
hsa-miR-942	2	0.00518902	0	0	0	0	0	0	17	0.10598	9	0.0647187	8	0.068103	4	0.0254741	0	0	0	0	5	0.0559986	2	0.0127711
hsa-miR-944	0	0	0	0	0	0	0	0	3	0.0187024	0	0	0	0	4	0.0254741	4	0.0215245	0	0	2	0.0223995	5	0.0319277
hsa-miR-95	0	0	3	0.0214004	0	0	0	0	0	0	0	0	0	0	17	0.108265	0	0	2	0.0172526	0	0	2	0.0127711
hsa-miR-96	0	0	0	0	0	0	3	0.0135339	2	0.0124683	48	0.345166	0	0	64	0.407585	3	0.0161434	0	0	0	0	8	0.0510844
hsa-miR-98	760	1.97183	220	1.56936	464	1.21372	3078	13.8857	720	4.48858	1034	7.43546	38	0.323489	2651	16.8829	603	3.24481	80	0.690103	280	3.13592	772	4.92964
hsa-miR-99a	189	0.490362	13	0.0927349	124	0.324356	956	4.31279	64	0.398985	9	0.0647187	295	2.5113	31	0.197424	58	0.312105	98	0.845376	85	0.951977	281	1.79434
hsa-miR-99a*	5	0.0129726	0	0	3	0.00784732	33	0.148872	0	0	0	0	8	0.068103	2	0.012737	0	0	0	0	0	0	0	0
hsa-miR-99b	8895	23.0782	1700	12.1269	6464	16.9084	2580	11.6391	4335	27.025	1488	10.7002	2439	20.7629	1553	9.89031	1700	9.1479	1019	8.79019	600	6.71984	4675	29.8524
hsa-miR-99b*	355	0.921051	33	0.235404	249	0.651327	404	1.82256	606	3.77789	153	1.10022	164	1.39611	189	1.20365	60	0.322867	19	0.163899	22	0.246394	132	0.842893
	3854292	10000	1401846	10000	3822963	10000	2216662	10000	1604072	10000	1390634	10000	1174692	10000	1570224	10000	1858350	10000	1159247	10000	892879	10000	1566036	10000
