# Supplementary material for: Characterization of the Melanoma miRNAome by Deep Sequencing
Source: PLoS One. 2010 Mar 12;5(3):e9685. doi: 10.1371/journal.pone.0009685 (PMC2837346; doi:10.1371/journal.pone.0009685)
Supplement: Table S3 — Common Known Mature and mature-star. (0.05 MB XLS) [file pone.0009685.s003.xls]

## Sheet: Sheet1
Supp Table 14- Shows the relative proportion of total unique read counts againts total number of reads of the known miRNAs common in all 12 libraries. The fraction is the multiplied by a factor of 10000 to see all values.
Known common mature and mature-star	QF1160MB	MELB	MM653	D20	MM386	MM426	MM466	MM603	MM472	D10	D11	MEL202
hsa-let-7a	1415.24	1925.88	2871.17	1801.06	1613.25	1352.89	747.5	1788.64	2355.42	1730.4	1479.77	1795.13
hsa-let-7a*	0.01	0.01	0.25	0.34	0.21	0.35	0.12	0.28	0.11	0.03	0.16	0.28
hsa-let-7b	463.38	428.43	1938.88	1197.84	475.66	1106.03	61	488	826.34	394.55	287.88	323.43
hsa-let-7b*	0.04	0.01	0.66	0.46	0.11	0.85	0.03	0.11	0.26	0.16	0.34	0.29
hsa-let-7c	22.89	19.52	25.98	157.06	13.81	3.8	46.27	11.19	43.44	62.01	52.03	110.18
hsa-let-7d	252.27	195.87	88.69	81.58	39.91	68.13	1.38	207.38	121.41	273.09	210.89	286.35
hsa-let-7e	431.79	349.82	272.34	71.27	121.6	49.59	74.95	66.07	147.88	80.82	48.58	193.71
hsa-let-7f	3239.72	4444.17	1682.19	2185.74	1184.97	2068.95	361.22	3522.02	2844.22	3567.09	4465.14	4419.11
hsa-let-7g	188.52	173	79.56	154.38	167.34	196.81	14.55	223.92	112.12	164.27	312	199.7
hsa-let-7i	603.28	327.68	166.18	299.39	448.11	188.87	9.47	166.21	208.34	267.41	258.87	80.43
hsa-miR-1	0.03	0.23	0.34	10.12	0.07	0.12	278.63	0.06	0.93	1.11	0.19	0.89
hsa-miR-100	3.11	2.18	28.13	12.08	13.2	5.93	2.73	0.27	11.54	0.68	1.6	0.01
hsa-miR-101	12.06	22.69	4.74	4.5	13.38	10.34	13.87	6.65	8.99	11.38	27.45	20.9
hsa-miR-103	272.95	166.67	118.06	248.91	379.26	404.62	769.97	601.84	318.07	175.53	387.4	317.51
hsa-miR-106b	2.59	1.65	1.35	7.87	8.05	17.4	20.61	5.62	9.52	9.48	11.41	13.94
hsa-miR-106b*	0.6	0.36	0.33	1.04	2.38	0.97	2.28	0.99	0.73	0.59	0.69	2.31
hsa-miR-107	22.77	34.67	13.72	23.25	43.88	41.61	95.45	43.52	20.72	26.5	32.2	80.32
hsa-miR-10a	27.03	26.42	1.31	11.03	7.8	16.03	13.56	10.46	21.33	2.93	14.09	0.15
hsa-miR-122	0.02	0.16	0.04	0.24	0.16	0.17	0.36	0.06	0.11	0.05	0.22	0.03
hsa-miR-1246	5.91	1.27	0.07	0.12	0.73	0.46	0.86	0.31	0.07	1.44	0.52	0.04
hsa-miR-1254	0.17	0.05	0.02	0.11	0.2	0.04	0.15	0.05	0.03	0.05	0.02	0.11
hsa-miR-1255a	0.12	0.21	0.07	0.18	0.38	0.13	0.17	0.08	0.17	0.43	0.03	0.04
hsa-miR-1255b	0.09	0.01	0.05	0.05	0.1	0.04	0.09	0.06	0.07	0.04	0.36	0.05
hsa-miR-1259	0.06	0.01	0.17	0.27	0.19	0.68	0.86	0.25	1.41	0.15	1.4	0.22
hsa-miR-125a-5p	2.75	1.85	1.94	0.94	1.76	1.08	1.17	0.73	1.02	0.37	0.49	1.3
hsa-miR-125b	1.03	1.67	24.48	2.8	2.06	0.93	1.21	0.15	3.17	0.78	0.66	0.93
hsa-miR-1274b	2.43	0.92	2.82	9.66	12.18	15.6	15.09	13.94	1.58	1.4	1.85	0.64
hsa-miR-1277	0.04	0.02	0.06	0.12	0.19	0.14	0.19	0.08	0.05	0.02	0.08	0.07
hsa-miR-1278	0.13	0.12	0.12	0.1	0.27	0.15	0.31	0.25	0.22	0.17	0.4	0.45
hsa-miR-128	10.11	8.77	4.22	10.02	20.19	8.05	44.19	18.95	20.56	9.25	33.06	9.85
hsa-miR-1280	0.11	0.04	0.3	0.47	0.18	1.29	0.79	0.22	0.12	0.11	0.45	0.17
hsa-miR-1285	0.62	0.18	0.1	0.91	1.15	1.06	3	0.62	0.32	0.35	0.25	0.44
hsa-miR-129-3p	0.11	0.41	0.95	0.07	0.36	0.1	0.13	0.08	0.04	7.32	0.55	9.32
hsa-miR-129-5p	0.71	1.98	0.78	0.05	0.35	0.06	0.09	0.15	0.07	6.26	0.43	6.08
hsa-miR-1301	1.03	0.49	0.02	0.9	7.84	2.6	6.55	3.8	1.22	0.06	1.27	0.84
hsa-miR-1306	0.09	0.02	0.03	0.32	0.22	0.17	0.08	0.37	0.1	0.02	0.2	0.09
hsa-miR-1307	2.39	0.76	0.81	6.29	27.57	4.08	2.58	7.94	0.89	0.72	1.53	2.09
hsa-miR-1308	2.34	0.91	1.75	18	3.96	11.97	22.91	14.99	6.82	0.72	9.16	3.8
hsa-miR-130b	3.63	1.45	1.23	5.08	3.59	11.78	8.11	2.17	2.22	2.17	4.32	4.08
hsa-miR-132	0.05	0.14	0.25	0.22	0.27	0.43	0.11	0.24	0.13	0.02	0.12	0.14
hsa-miR-138	0.59	0.22	1.43	2.45	2.48	1.04	2.6	4.26	0.32	1.65	1.08	0.45
hsa-miR-140-3p	192.73	159.6	162.75	174.2	126.4	131.21	132.66	81.02	571.05	197.4	163.19	142.61
hsa-miR-146a	32.65	25.92	0.13	44.46	177.75	295.89	197.66	104.96	18.4	34.96	91.23	46.74
hsa-miR-146b-5p	0.13	0.22	1.51	4.28	1.02	1.11	0.38	0.75	0.97	0.21	0.41	0.15
hsa-miR-148a	5.43	4.8	1.05	14.72	13.95	5.57	13.36	9.48	20.28	6.11	15.6	10.15
hsa-miR-148a*	0.03	0.02	0.01	0.07	0.07	0.03	0.03	0.02	0.06	0.05	0.04	0.08
hsa-miR-148b	2.49	2.15	1.25	2.92	4.08	6.43	10.44	3.95	4.16	1.22	5.23	7.29
hsa-miR-151-3p	18.69	13.6	7.85	4.7	8.8	6.87	12.16	13.35	10.21	10.53	8.62	46.44
hsa-miR-151-5p	3.19	1.39	1.26	1.37	2.24	2.57	4.04	4.48	1.56	1.64	2.32	5.57
hsa-miR-152	33.77	30.28	83.17	28.89	87.27	26.04	77.95	17.96	9.41	6.41	7.15	46.14
hsa-miR-15a	0.8	0.26	0.45	1.78	2.14	4.92	3.4	1.27	0.72	0.32	1.6	0.89
hsa-miR-15b	1.56	0.54	1.36	9.66	6.67	23.88	10.3	7.62	3.02	2.7	7.99	4.85
hsa-miR-16	10.02	2.97	4.14	19.78	19.68	44.01	25.63	12.78	5.94	5.93	12.14	7.63
hsa-miR-17	1.16	0.28	0.31	2.17	1.89	4.21	11.98	7.74	1.58	0.77	0.67	3.42
hsa-miR-17*	1.69	0.64	0.6	1.65	1.32	3.85	4.57	4.96	1.16	1.1	0.57	2.38
hsa-miR-181a	86.62	26.61	41.47	124.17	244.38	46.23	152.58	79.94	46.3	10.92	13.13	21.64
hsa-miR-181a-2*	3.05	1.8	2.06	0.6	2.3	1.46	0.7	0.48	0.4	2.79	4.2	0.95
hsa-miR-181b	48.15	11.73	13.08	61.51	149.94	21.65	53.21	42.08	28.33	8.7	7.81	10.85
hsa-miR-181d	0.38	0.93	1.35	5.14	3.12	5.93	1.17	1.22	0.41	1.21	0.68	0.15
hsa-miR-184	0.23	0.03	0.01	0.08	1.27	1.7	2.33	0.61	0.21	0.13	0.49	0.03
hsa-miR-185	76.23	59.77	10.96	98.94	211.12	107.63	228.6	188.9	62.35	55.79	133	39.26
hsa-miR-185*	0.77	0.29	0.11	0.64	0.84	0.36	0.65	0.73	0.37	0.6	1.44	0.27
hsa-miR-186	1.77	0.85	0.78	5.48	6.58	8.18	8	4.1	2.24	1.34	7.48	3.44
hsa-miR-188-5p	0.09	0.01	0.02	1.2	0.41	0.66	0.77	0.27	0.28	0.03	0.22	0.06
hsa-miR-191	68.82	27.64	30.47	55.27	76.94	44	44.24	69.11	58.87	65.15	66.12	40.48
hsa-miR-192	4.31	10.94	1.97	5.74	21.4	4.29	6.64	14	10.83	4.46	12.02	3.54
hsa-miR-193a-3p	0.59	0.26	1.21	0.99	1.43	0.26	2.66	0.81	1.22	0.79	0.35	0.16
hsa-miR-193a-5p	3.18	1.24	7.02	2.79	7.56	0.52	4.74	2.01	2.67	2.18	0.2	0.15
hsa-miR-193b	0.66	0.29	1.73	2.7	0.87	5.5	4.13	0.89	1.55	0.98	0.81	0.26
hsa-miR-193b*	2.21	0.88	4.83	0.83	0.79	1.05	1	0.46	1.85	1.59	0.32	0.2
hsa-miR-197	0.14	0.14	0.12	0.44	0.47	0.39	0.29	0.2	0.34	0.04	1.38	0.22
hsa-miR-19b	1.25	0.04	0.2	5.71	3.8	9.15	26.27	8.72	2.21	0.3	1.65	1.68
hsa-miR-20a	0.52	0.19	0.16	0.92	1.02	2.06	4.95	3.5	0.89	0.47	0.26	1.47
hsa-miR-21	153.05	97.54	302.52	358.35	631.32	691.38	342.86	200.75	397.51	164.5	158.05	79.49
hsa-miR-21*	1.34	0.63	3.17	5.08	7.82	11.25	3.86	1.57	2.91	2.18	1.76	0.7
hsa-miR-210	0.57	0.06	0.42	5.61	0.95	1.18	0.39	1.16	0.33	0.1	0.82	0.11
hsa-miR-22	7.84	9.49	23.49	14	23.43	24.56	25.83	10.56	10.7	3.28	10.68	8.97
hsa-miR-22*	0.64	0.37	1.4	0.85	1.12	1.47	0.75	0.34	0.61	0.09	0.32	0.2
hsa-miR-221	67.18	80.96	479.06	285.14	244.98	121.65	146.15	158	142.74	19.25	41.04	25.73
hsa-miR-221*	2.94	4.64	30.35	16.09	10.12	18.61	12.38	4.82	21.55	5.82	20.27	1.91
hsa-miR-222	25.2	41.38	200.17	72.37	53.11	42.44	46.77	40.89	71.34	10.34	27.04	14.33
hsa-miR-23a	16.32	9.32	32.87	68.17	44.6	85.77	59.73	26.02	37.53	11.88	37.82	22.52
hsa-miR-23a*	0.07	0.06	0.29	0.16	0.14	0.13	0.12	0.1	0.15	0.02	0.02	0.03
hsa-miR-23b	5.67	0.11	14.75	7.62	1.83	1.75	2.77	2.66	2.06	1.81	4.73	0.68
hsa-miR-23b*	2.93	0.24	4.22	0.79	0.27	0.02	0.1	0.34	0.43	1.08	0.6	0.04
hsa-miR-24	22.58	17.96	28.16	60.07	49.12	44.43	50.29	32.51	22.77	9.12	28.46	12.05
hsa-miR-25	66.27	42.27	22.13	154.33	197.25	208.07	306.96	93.73	123.47	185.53	204.28	131.94
hsa-miR-25*	9.45	5.99	5.47	6.92	14.23	13.96	18.33	8.74	19.86	80.08	14.1	25.48
hsa-miR-26a	13.6	18.63	15.72	19.22	18.74	16.7	53.44	15.8	13.72	10.83	35.41	11.94
hsa-miR-26b	3.83	5.29	5.11	13.96	31.61	10.2	25.28	6.25	9.29	3.52	17.89	6.74
hsa-miR-27a	5.08	4.63	6.61	25.32	19.21	27.82	22.24	10.49	8.76	2.98	11	3.15
hsa-miR-27a*	0.09	0.14	0.41	0.26	0.16	0.22	0.13	0.06	0.13	0.19	0.11	0.14
hsa-miR-27b	5.42	0.47	9.38	5.16	2.6	1.4	2.32	2.17	1.67	1.93	4.88	0.4
hsa-miR-27b*	0.64	0.03	1.39	0.44	0.17	0.09	0.2	0.19	0.2	0.64	0.47	0.05
hsa-miR-28-3p	4.51	2.13	2.02	3.38	1.75	2.52	2.46	0.89	2.26	1.16	4.28	2.53
hsa-miR-28-5p	0.75	0.46	0.44	0.99	0.67	0.76	0.79	0.25	0.52	0.19	0.96	0.48
hsa-miR-29a	274.17	254.03	295.75	607.44	1218.23	664.27	2166.24	281.02	230.8	1102.94	147.86	89.74
hsa-miR-29b	14.33	12.41	10.99	36.39	57.93	44.58	151.22	14.09	13.49	64.9	16.55	5.08
hsa-miR-29c	0.49	0.54	0.64	2.06	4.21	1.62	4.58	1.03	1.17	1.04	0.75	1.14
hsa-miR-301b	0.05	0.04	0.02	0.23	0.11	0.12	0.33	0.16	0.07	0.03	0.16	0.2
hsa-miR-30a	36.73	14.66	9.49	35.98	68.94	113.7	42.34	30.93	19.1	2.42	13.94	17.39
hsa-miR-30a*	18.3	6.19	6.69	13.34	30.85	29.8	9.99	7.65	10.76	1.44	8.4	9.6
hsa-miR-30b	0.15	0.09	0.06	0.73	1.05	3.34	1.81	2.06	0.7	0.41	1.19	1.01
hsa-miR-30b*	0.09	0.1	0.07	0.21	0.34	0.94	0.43	0.74	0.4	0.26	0.34	0.34
hsa-miR-30c	0.78	0.45	0.14	0.83	1.64	1.93	1.34	0.83	1.08	0.22	1.39	0.86
hsa-miR-30c-1*	0.07	0.03	0.03	0.03	0.2	0.07	0.09	0.1	0.06	0.03	0.07	0.1
hsa-miR-30c-2*	1.12	0.61	0.43	0.68	1.17	3.04	0.6	0.48	1.11	0.12	1.25	0.83
hsa-miR-30d	34.41	20.69	5.42	44.53	84.83	108.63	90.18	177.94	52.94	32.39	39.17	47.79
hsa-miR-30e	2.89	1.69	0.47	4.4	9.88	4.81	8.13	6.47	2.31	1.3	2.96	1.84
hsa-miR-30e*	13.09	7.34	4.1	9.89	28.43	8.28	14.53	11.8	11.67	6.83	18.87	8.9
hsa-miR-320a	497.06	233.19	307.57	191.74	118.22	184.97	260.75	93.64	222.38	271.62	118.52	382.33
hsa-miR-320b	2.25	0.86	1.09	0.87	0.36	0.95	1.2	0.29	0.89	2.37	0.43	5.53
hsa-miR-320c	0.67	0.19	0.29	0.36	0.13	0.24	0.26	0.08	0.52	0.33	0.06	0.38
hsa-miR-320d	0.29	0.09	0.18	0.07	0.07	0.01	0.02	0.01	0.05	0.22	0.02	0.29
hsa-miR-324-5p	0.21	0.04	0.07	1.08	2.21	1.39	1.62	1.53	0.56	0.08	1.1	0.56
hsa-miR-330-3p	15.47	4.14	3.29	7.53	16.86	4.67	9.96	6.79	5.8	3.13	5.68	10.59
hsa-miR-331-3p	1.1	0.49	1.09	1.11	1.24	0.65	2.56	0.5	2.85	1.54	9.19	14.86
hsa-miR-339-3p	0.4	0.12	0.17	0.92	1.76	1.21	1.01	1.22	0.41	0.1	0.32	0.45
hsa-miR-339-5p	0.05	0.05	0.05	0.49	0.68	0.85	0.93	0.45	0.38	0.11	0.3	0.37
hsa-miR-33a	1.69	0.39	0.34	6.58	4.99	5.1	4.08	3.28	1.67	0.7	0.46	1.39
hsa-miR-340	6.86	8.17	1.7	8.3	24.2	31.47	30.47	14.58	14.78	7.37	61.64	18.19
hsa-miR-342-3p	0.78	0.16	0.57	0.35	1.44	0.53	0.66	1.17	0.34	0.46	1.04	1.32
hsa-miR-345	1.21	0.37	0.16	1.27	1.05	0.78	1.23	0.41	0.64	0.78	0.62	0.48
hsa-miR-361-5p	0.35	0.17	0.43	6.58	2.71	3.54	4.68	1.72	1.12	0.46	1.33	1.19
hsa-miR-362-3p	0.03	0.03	0.01	0.63	0.29	1.04	0.95	0.2	0.35	0.15	0.72	0.03
hsa-miR-362-5p	0.1	0.01	0.02	1.05	0.66	0.54	1.33	0.47	0.29	0.11	0.27	0.1
hsa-miR-365	1.44	1.01	6.24	1.79	1.63	2.35	4.32	1.73	8.29	3.41	3.21	1.63
hsa-miR-374a	0.19	0.39	0.18	1.2	1.1	1.32	2.02	0.97	0.47	0.26	1.41	0.54
hsa-miR-374a*	0.37	0.63	0.42	1.48	1.35	1.1	1.57	1.06	1.06	0.46	2.11	1.33
hsa-miR-374b	1.37	0.74	0.89	5.04	4.25	4.83	6.66	2.69	3.98	1.8	11.84	7.53
hsa-miR-374b*	0.02	0.04	0.03	0.08	0.11	0.06	0.08	0.04	0.03	0.06	0.15	0.13
hsa-miR-378	410.22	249.88	4.72	181.32	125.94	355.55	596.53	185.58	42.89	319.77	139.53	370.8
hsa-miR-421	0.19	0.11	0.09	1.64	1.78	0.77	2.61	1.54	0.41	0.45	1.81	0.95
hsa-miR-423-3p	10.16	5.04	3.34	8.25	14.92	8.02	19.17	5.99	6.84	7.36	2.61	5.64
hsa-miR-423-5p	339.71	160.86	92.75	116.57	261.33	150.08	403.73	134.92	164.8	146.66	73.79	79.53
hsa-miR-424	0.86	0.13	6.51	16.72	1.48	5.06	5.44	1.83	7.86	0.43	0.75	0.73
hsa-miR-424*	1.26	0.17	3.19	2.55	0.37	0.72	0.86	0.2	1.76	0.28	0.28	0.13
hsa-miR-425	0.36	0.12	0.18	2.25	2.89	3.16	2.43	2.48	1.06	0.76	2.02	0.47
hsa-miR-450a	0.01	0.01	0.06	0.14	0.03	0.02	0.24	0.03	0.26	0.05	0.08	0.01
hsa-miR-454	0.11	0.01	0.01	0.1	0.25	0.24	0.23	0.14	0.09	0.07	0.11	0.4
hsa-miR-484	0.14	0.05	0.17	0.12	0.33	0.41	0.33	0.1	0.49	0.19	0.37	0.24
hsa-miR-499-5p	0.03	0.01	0.02	0.33	0.1	0.14	0.2	3.05	0.22	0.09	0.3	0.01
hsa-miR-501-3p	0.17	0.11	0.01	0.47	0.44	0.53	0.52	0.18	0.39	0.36	0.83	0.08
hsa-miR-502-3p	1.04	0.59	0.23	4.25	2.73	3.83	4.57	1.6	2.73	1.55	3.3	0.57
hsa-miR-503	3.28	0.55	10.78	13.71	1.59	1.51	2.74	1.83	7.12	1.17	0.46	1.28
hsa-miR-509-3-5p	30.18	14.27	0.01	23.53	8.78	0.02	66.22	8.34	43.2	14.88	5.03	0.48
hsa-miR-532-3p	0.18	0.04	0.07	0.83	0.49	0.64	0.72	0.36	1.5	0.33	0.96	0.14
hsa-miR-532-5p	2.84	1.22	1.59	22.32	12.28	12.2	19.61	7.29	7.86	5.41	7.44	2.31
hsa-miR-542-3p	0.27	0.14	0.6	1.27	0.47	0.2	1.77	0.62	1.06	0.14	0.37	0.2
hsa-miR-548e	0.19	0.11	0.08	0.09	0.11	0.1	0.1	0.08	0.06	0.15	0.36	0.36
hsa-miR-548k	0.37	0.07	0.03	0.06	0.37	0.2	0.41	0.22	0.1	0.16	0.75	0.11
hsa-miR-574-3p	0.92	0.08	2.06	2.87	1.46	1.04	1.98	0.95	1.34	0.09	0.6	0.82
hsa-miR-584	3.16	1.28	0.21	7.53	12.51	11.86	21.71	15.9	13.09	1.61	12.57	4.15
hsa-miR-589	0.26	0.04	0.06	0.2	1.32	0.35	0.35	0.27	0.27	0.09	0.44	0.12
hsa-miR-590-5p	0.02	0.01	0.02	0.14	0.13	0.22	0.53	0.08	0.06	0.07	0.26	0.04
hsa-miR-598	0.29	0.12	0.05	0.03	0.05	0.62	5.79	1.26	1.6	0.07	0.39	1.07
hsa-miR-625	0.13	0.03	0.04	0.08	0.16	0.15	0.17	0.03	0.13	0.06	0.16	0.02
hsa-miR-629	0.19	0.04	0.14	0.6	0.59	0.72	1.05	0.32	0.28	0.21	0.49	0.11
hsa-miR-652	0.24	0.04	0.09	4.41	5.39	8.64	10.33	2.95	0.91	0.6	3.2	0.57
hsa-miR-660	0.4	0.24	0.12	8.17	3.32	8.36	10.45	2.17	2.45	0.56	4.63	0.53
hsa-miR-664	0.06	0.03	0.14	0.1	0.2	0.11	0.32	0.06	0.42	0.07	0.75	0.29
hsa-miR-664*	0.51	0.52	0.25	0.47	0.87	0.29	0.89	0.22	0.75	0.16	0.95	0.4
hsa-miR-7	0.39	0.31	0.35	2.61	2.54	2.11	2.83	10.3	1.21	0.61	4.39	1.29
hsa-miR-7-1*	0.03	0.01	0.02	0.08	0.11	0.18	0.2	0.09	0.06	0.03	0.2	0.15
hsa-miR-720	0.28	0.19	0.52	0.73	0.65	1.04	1.18	0.83	0.29	0.29	0.4	0.33
hsa-miR-744	6.03	3.5	3.1	7.77	24.53	3.57	18.54	19.96	7.12	0.88	4.02	3.82
hsa-miR-760	0.35	0.14	0.15	1.89	2.72	0.91	2.68	3.24	1.51	0.76	1.24	0.63
hsa-miR-768-5p	0.71	0.33	0.35	0.25	0.46	0.26	0.15	0.18	0.21	0.4	0.21	0.2
hsa-miR-769-5p	0.11	0.01	0.04	0.26	0.54	0.42	0.45	0.39	0.13	0.03	0.08	0.25
hsa-miR-877	2.38	0.58	0.91	2.88	3.96	1.34	1.87	3.32	1.5	0.49	0.66	2.04
hsa-miR-92a	106.18	35.45	39.16	99.72	178.25	164.34	322.19	249.3	56.08	85.51	41.42	83.66
hsa-miR-92a-1*	2.35	2.03	1.08	0.39	1.3	0.82	2.95	4.6	1.26	1.44	0.2	1.8
hsa-miR-92b	3.25	2.61	13.09	6.65	14.74	6.58	5.07	9.2	4.19	10.44	3.76	8.38
hsa-miR-92b*	1.28	0.66	3.08	2.01	6.13	3.29	1.92	3.66	1.02	3.05	2.05	1.74
hsa-miR-93	4.29	1.31	1.94	39.48	46.7	46.13	98.23	31.42	15.17	10.01	13.09	14.66
hsa-miR-941	0.32	0.3	0.24	1.02	1.06	0.65	0.55	0.76	0.25	0.28	0.41	0.37
hsa-miR-98	1.97	1.57	1.21	13.89	4.49	7.44	0.32	16.88	3.24	0.69	3.14	4.93
hsa-miR-99a	0.49	0.09	0.32	4.31	0.4	0.06	2.51	0.2	0.31	0.85	0.95	1.79
hsa-miR-99b	23.08	12.13	16.91	11.64	27.02	10.7	20.76	9.89	9.15	8.79	6.72	29.85
hsa-miR-99b*	0.92	0.24	0.65	1.82	3.78	1.1	1.4	1.2	0.32	0.16	0.25	0.84
