# Supplementary material for: Characterization of the Melanoma miRNAome by Deep Sequencing
Source: PLoS One. 2010 Mar 12;5(3):e9685. doi: 10.1371/journal.pone.0009685 (PMC2837346; doi:10.1371/journal.pone.0009685)
Supplement: Table S4 — Known miRNAs unique to each library. (0.04 MB XLS) [file pone.0009685.s004.xls]

## Sheet: Sheet1
Supp Table 15- Known miRNAs unique to each library
miRNA name	QF1160MB	MELB	MM653	D20	MM386	MM426	MM466	MM603	MM472	D10	D11	MEL202
hsa-let-7c*	x	x	x	hsa-let-7c*	x	x	x	x	x	x	x	x
hsa-miR-105*	x	x	x	hsa-miR-105*	x	x	x	x	x	x	x	x
hsa-miR-1185	x	x	hsa-miR-1185	x	x	x	x	x	x	x	x	x
hsa-miR-1197	x	x	hsa-miR-1197	x	x	x	x	x	x	x	x	x
hsa-miR-1224-5p	x	x	x	x	hsa-miR-1224-5p	x	x	x	x	x	x	x
hsa-miR-1226	x	x	x	x	x	hsa-miR-1226	x	x	x	x	x	x
hsa-miR-1226*	x	x	x	x	hsa-miR-1226*	x	x	x	x	x	x	x
hsa-miR-1228	hsa-miR-1228	x	x	x	x	x	x	x	x	x	x	x
hsa-miR-1252	x	x	x	x	hsa-miR-1252	x	x	x	x	x	x	x
hsa-miR-1257	x	x	x	x	x	x	hsa-miR-1257	x	x	x	x	x
hsa-miR-126	x	x	x	hsa-miR-126	x	x	x	x	x	x	x	x
hsa-miR-1260	x	x	x	hsa-miR-1260	x	x	x	x	x	x	x	x
hsa-miR-1267	x	x	x	x	x	x	x	x	x	x	x	hsa-miR-1267
hsa-miR-127-5p	x	x	hsa-miR-127-5p	x	x	x	x	x	x	x	x	x
hsa-miR-1289	hsa-miR-1289	x	x	x	x	x	x	x	x	x	x	x
hsa-miR-1302	x	x	x	x	hsa-miR-1302	x	x	x	x	x	x	x
hsa-miR-1304	x	x	x	x	hsa-miR-1304	x	x	x	x	x	x	x
hsa-miR-136	x	x	hsa-miR-136	x	x	x	x	x	x	x	x	x
hsa-miR-136*	x	x	hsa-miR-136*	x	x	x	x	x	x	x	x	x
hsa-miR-137	x	x	hsa-miR-137	x	x	x	x	x	x	x	x	x
hsa-miR-139-3p	x	x	x	hsa-miR-139-3p	x	x	x	x	x	x	x	x
hsa-miR-142-5p	x	hsa-miR-142-5p	x	x	x	x	x	x	x	x	x	x
hsa-miR-154	x	x	hsa-miR-154	x	x	x	x	x	x	x	x	x
hsa-miR-154*	x	x	hsa-miR-154*	x	x	x	x	x	x	x	x	x
hsa-miR-1827	x	x	x	x	x	x	x	x	x	hsa-miR-1827	x	x
hsa-miR-187*	x	x	x	x	x	x	x	hsa-miR-187*	x	x	x	x
hsa-miR-196a*	x	x	x	x	x	x	x	hsa-miR-196a*	x	x	x	x
hsa-miR-217	x	x	x	x	hsa-miR-217	x	x	x	x	x	x	x
hsa-miR-219-2-3p	x	x	x	x	x	x	x	x	hsa-miR-219-2-3p	x	x	x
hsa-miR-26b*	x	x	x	x	hsa-miR-26b*	x	x	x	x	x	x	x
hsa-miR-299-5p	x	x	hsa-miR-299-5p	x	x	x	x	x	x	x	x	x
hsa-miR-323-5p	x	x	hsa-miR-323-5p	x	x	x	x	x	x	x	x	x
hsa-miR-329	x	x	hsa-miR-329	x	x	x	x	x	x	x	x	x
hsa-miR-335*	x	x	x	x	x	x	x	x	x	hsa-miR-335*	x	x
hsa-miR-337-3p	x	x	hsa-miR-337-3p	x	x	x	x	x	x	x	x	x
hsa-miR-337-5p	x	x	hsa-miR-337-5p	x	x	x	x	x	x	x	x	x
hsa-miR-369-5p	x	x	hsa-miR-369-5p	x	x	x	x	x	x	x	x	x
hsa-miR-371-5p	x	x	x	x	x	x	x	hsa-miR-371-5p	x	x	x	x
hsa-miR-376a	x	x	hsa-miR-376a	x	x	x	x	x	x	x	x	x
hsa-miR-376a*	x	x	hsa-miR-376a	x	x	x	x	x	x	x	x	x
hsa-miR-377	x	x	hsa-miR-377	x	x	x	x	x	x	x	x	x
hsa-miR-377*	x	x	hsa-miR-377*	x	x	x	x	x	x	x	x	x
hsa-miR-379*	x	x	hsa-miR-379*	x	x	x	x	x	x	x	x	x
hsa-miR-381	x	x	hsa-miR-381	x	x	x	x	x	x	x	x	x
hsa-miR-383	x	x	x	x	x	x	x	x	x	x	x	hsa-miR-383
hsa-miR-411*	x	x	hsa-miR-411*	x	x	x	x	x	x	x	x	x
hsa-miR-431	x	x	hsa-miR-431	x	x	x	x	x	x	x	x	x
hsa-miR-431*	x	x	hsa-miR-431*	x	x	x	x	x	x	x	x	x
hsa-miR-449b	x	x	x	x	x	x	x	hsa-miR-449b	x	x	x	x
hsa-miR-450b-3p	x	x	x	hsa-miR-450b-3p	x	x	x	x	x	x	x	x
hsa-miR-483-5p	x	x	hsa-miR-483-5p	x	x	x	x	x	x	x	x	x
hsa-miR-486-3p	x	x	hsa-miR-486-3p	x	x	x	x	x	x	x	x	x
hsa-miR-490-3p	x	hsa-miR-490-3p	x	x	x	x	x	x	x	x	x	x
hsa-miR-493	x	x	hsa-miR-493	x	x	x	x	x	x	x	x	x
hsa-miR-496	x	x	hsa-miR-496	x	x	x	x	x	x	x	x	x
hsa-miR-498	x	x	x	x	x	x	x	hsa-miR-498	x	x	x	x
hsa-miR-512-3p	x	x	x	x	x	x	x	hsa-miR-512-3p	x	x	x	x
hsa-miR-515-5p	x	x	x	x	x	x	x	hsa-miR-515-5p	x	x	x	x
hsa-miR-516b	x	x	x	x	x	x	x	hsa-miR-516b	x	x	x	x
hsa-miR-517a	x	x	x	x	x	x	x	hsa-miR-517a	x	x	x	x
hsa-miR-517b	x	x	x	x	x	x	x	hsa-miR-517b	x	x	x	x
hsa-miR-517c	x	x	x	x	x	x	x	hsa-miR-517c	x	x	x	x
hsa-miR-518a-3p	x	x	x	x	x	x	x	hsa-miR-518a-3p	x	x	x	x
hsa-miR-518b	x	x	x	x	x	x	x	hsa-miR-518b	x	x	x	x
hsa-miR-518c*	x	x	x	x	x	x	x	hsa-miR-518c*	x	x	x	x
hsa-miR-518f	x	x	x	x	x	x	x	hsa-miR-518f	x	x	x	x
hsa-miR-519b-3p	x	x	x	x	x	x	x	hsa-miR-519b-3p	x	x	x	x
hsa-miR-519d	x	x	x	x	x	x	x	hsa-miR-519d	x	x	x	x
hsa-miR-520a-3p	x	x	x	x	x	x	x	hsa-miR-520a-3p	x	x	x	x
hsa-miR-520a-5p	x	x	x	x	x	x	x	hsa-miR-520a-5p	x	x	x	x
hsa-miR-520g	x	x	x	x	x	x	x	hsa-miR-520g	x	x	x	x
hsa-miR-521	x	x	x	hsa-miR-521	x	x	x	x	x	x	x	x
hsa-miR-522	x	x	x	x	x	x	x	hsa-miR-522	x	x	x	x
hsa-miR-524-5p	x	x	x	x	x	x	x	hsa-miR-524-5p	x	x	x	x
hsa-miR-525-3p	x	x	x	x	x	x	x	hsa-miR-525-3p	x	x	x	x
hsa-miR-525-5p	x	x	x	x	x	x	x	hsa-miR-525-5p	x	x	x	x
hsa-miR-526b	x	x	x	x	x	x	x	hsa-miR-526b	x	x	x	x
hsa-miR-539	x	x	hsa-miR-539	x	x	x	x	x	x	x	x	x
hsa-miR-548b-3p	x	x	x	x	x	x	x	x	x	x	x	hsa-miR-548b-3p
hsa-miR-548b-5p	x	x	x	x	x	x	x	hsa-miR-548b-5p	x	x	x	x
hsa-miR-548h	x	x	hsa-miR-548h	x	x	x	x	x	x	x	x	x
hsa-miR-548i	hsa-miR-548i	x	x	x	x	x	x	x	x	x	x	x
hsa-miR-577	x	x	x	x	x	hsa-miR-577	x	x	x	x	x	x
hsa-miR-585	x	x	hsa-miR-585	x	x	x	x	x	x	x	x	x
hsa-miR-605	hsa-miR-605	x	x	x	x	x	x	x	x	x	x	x
hsa-miR-616	hsa-miR-616	x	x	x	x	x	x	x	x	x	x	x
hsa-miR-618	x	x	hsa-miR-618	x	x	x	x	x	x	x	x	x
hsa-miR-627	x	x	x	x	x	x	hsa-miR-627	x	x	x	x	x
hsa-miR-643	x	x	x	x	x	x	x	x	x	x	x	hsa-miR-643
hsa-miR-654-3p	x	x	hsa-miR-654-3p	x	x	x	x	x	x	x	x	x
hsa-miR-654-5p	x	x	hsa-miR-654-5p	x	x	x	x	x	x	x	x	x
hsa-miR-655	x	x	hsa-miR-655	x	x	x	x	x	x	x	x	x
hsa-miR-656	x	x	hsa-miR-656	x	x	x	x	x	x	x	x	x
hsa-miR-665	x	x	hsa-miR-665	x	x	x	x	x	x	x	x	x
hsa-miR-668	x	x	hsa-miR-668	x	x	x	x	x	x	x	x	x
hsa-miR-877*	x	x	x	hsa-miR-877*	x	x	x	x	x	x	x	x
