# Supplementary material for: Characterization of the Melanoma miRNAome by Deep Sequencing
Source: PLoS One. 2010 Mar 12;5(3):e9685. doi: 10.1371/journal.pone.0009685 (PMC2837346; doi:10.1371/journal.pone.0009685)
Supplement: Table S5 — Relative ratios of miRNA compared to miRNA-star. (0.12 MB XLS) [file pone.0009685.s005.xls]

## Sheet: relative ratios
Supp Table 16: Showing the relative ratio of mature and mature-star unnormalised sequence counts
Known Mature miRNA	Known Mature-star_ miRNA	D10_star	D10	Ratio	D11_star	D11	Ratio	D20_star	D20	Ratio	MEL202_star	MEL202	Ratio	MELB_star	MELB	Ratio	MM386_star	MM386	Ratio	MM426_star	MM426	Ratio	MM466_star	MM466	Ratio	MM472_star	MM472	Ratio	MM603_star	MM603	Ratio	MM653_star	MM653	Ratio	QF1160MB_star	QF1160MB	Ratio
hsa-let-7a	hsa-let-7a*	3	200596	66865.3	14	132126	9437.57	76	399235	5253.09	44	281124	6389.18	2	269979	134990	34	258777	7611.09	49	188137	3839.53	14	87808	6272	20	437719	21886	44	280857	6383.11	96	1097637	11433.7	3	545475	181825
hsa-let-7b	hsa-let-7b*	19	45738	2407.26	30	25704	856.8	101	265520	2628.91	46	50650	1101.09	2	60059	30029.5	17	76300	4488.24	118	153808	1303.46	3	7166	2388.67	49	153562	3133.92	17	76627	4507.47	252	741225	2941.37	16	178601	11162.6
hsa-let-7c	hsa-let-7c*	0	7189	n/a	0	4646	n/a	2	34816	17408	0	17255	n/a	0	2736	n/a	0	2215	n/a	0	528	n/a	0	5435	n/a	0	8073	n/a	0	1757	n/a	0	9933	n/a	0	8822	n/a
hsa-let-7d	hsa-let-7d*	25	31658	1266.32	50	18830	376.6	94	18084	192.383	121	44844	370.612	11	27458	2496.18	32	6402	200.062	69	9474	137.304	0	162	n/a	31	22563	727.839	174	32564	187.149	70	33905	484.357	80	97231	1215.39
hsa-let-7e	hsa-let-7e*	0	9369	n/a	2	4338	2169	14	15799	1128.5	3	30335	10111.7	2	49040	24520	12	19505	1625.42	7	6896	985.143	8	8804	1100.5	6	27481	4580.17	3	10375	3458.33	25	104114	4164.56	9	166425	18491.7
hsa-let-7f	hsa-let-7f-1*	0	413514	n/a	10	398683	39868.3	15	484504	32300.3	36	692048	19223.6	6	623004	103834	10	190077	19007.7	15	287715	19181	0	42432	n/a	5	528556	105711	47	553036	11766.7	51	643096	12609.7	7	1248682	178383
hsa-let-7f	hsa-let-7f-2*	0	413514	n/a	0	398683	n/a	2	484504	242252	0	692048	n/a	0	623004	n/a	0	190077	n/a	0	287715	n/a	2	42432	21216	0	528556	n/a	0	553036	n/a	0	643096	n/a	0	1248682	n/a
hsa-let-7g	hsa-let-7g*	0	19043	n/a	0	27858	n/a	0	34220	n/a	0	31274	n/a	0	24252	n/a	0	26842	n/a	0	27369	n/a	0	1709	n/a	0	20836	n/a	2	35161	17580.5	2	30414	15207	0	72663	n/a
hsa-let-7i	hsa-let-7i*	4	31000	7750	5	23114	4622.8	24	66365	2765.21	4	12596	3149	10	45935	4593.5	20	71880	3594	20	26265	1313.25	0	1112	n/a	6	38717	6452.83	2	26098	13049	18	63531	3529.5	53	232522	4387.21
hsa-miR-100	hsa-miR-100*	0	79	n/a	0	143	n/a	2	2677	1338.5	0	2	n/a	0	305	n/a	0	2117	n/a	0	824	n/a	0	321	n/a	0	2145	n/a	0	42	n/a	6	10753	1792.17	0	1200	n/a
hsa-miR-105	hsa-miR-105*	0	0	n/a	0	11	n/a	2	80	40	0	0	n/a	0	0	n/a	0	18	n/a	0	2	n/a	0	0	n/a	0	17	n/a	0	12	n/a	0	0	n/a	0	0	n/a
hsa-miR-106b	hsa-miR-106b*	68	1099	16.1618	62	1019	16.4355	231	1745	7.55411	361	2183	6.04709	51	231	4.52941	382	1292	3.3822	135	2420	17.9259	268	2421	9.03358	135	1769	13.1037	155	883	5.69677	128	515	4.02344	231	999	4.32468
hsa-miR-10a	hsa-miR-10a*	0	340	n/a	0	1258	n/a	9	2446	271.778	0	24	n/a	5	3704	740.8	0	1251	n/a	3	2229	743	3	1593	531	5	3963	792.6	0	1642	n/a	0	501	n/a	19	10417	548.263
hsa-miR-10b	hsa-miR-10b*	0	18	n/a	0	169	n/a	0	202	n/a	0	0	n/a	2	827	413.5	5	578	115.6	0	176	n/a	0	228	n/a	0	515	n/a	0	112	n/a	0	1739	n/a	6	1449	241.5
hsa-miR-1228	hsa-miR-1228*	0	0	n/a	0	0	n/a	2	0	n/a	0	0	n/a	0	0	n/a	0	0	n/a	0	0	n/a	0	0	n/a	0	0	n/a	0	0	n/a	14	0	n/a	2	2	1
hsa-miR-126	hsa-miR-126*	2	0	n/a	0	0	n/a	0	3	n/a	0	0	n/a	0	0	n/a	8	0	n/a	2	0	n/a	5	0	n/a	0	0	n/a	5	0	n/a	0	0	n/a	0	0	n/a
hsa-miR-132	hsa-miR-132*	0	2	n/a	0	11	n/a	2	48	24	3	22	7.33333	4	20	5	7	43	6.14286	5	60	12	3	13	4.33333	4	25	6.25	9	37	4.11111	22	95	4.31818	3	20	6.66667
hsa-miR-135b	hsa-miR-135b*	0	2	n/a	0	2	n/a	0	17	n/a	0	9	n/a	2	0	n/a	28	133	4.75	2	25	12.5	7	22	3.14286	23	311	13.5217	12	19	1.58333	0	0	n/a	0	0	n/a
hsa-miR-136	hsa-miR-136*	0	0	n/a	0	0	n/a	0	0	n/a	0	0	n/a	0	0	n/a	0	0	n/a	0	0	n/a	0	0	n/a	0	0	n/a	0	0	n/a	54	179	3.31481	0	0	n/a
hsa-miR-138	hsa-miR-138-1*	0	191	n/a	0	96	n/a	0	543	n/a	0	70	n/a	0	31	n/a	0	398	n/a	0	145	n/a	2	306	153	0	59	n/a	2	669	334.5	6	547	91.1667	2	226	113
hsa-miR-143	hsa-miR-143*	0	14	n/a	0	58	n/a	0	0	n/a	0	6	n/a	2	187	93.5	0	0	n/a	0	0	n/a	0	46	n/a	17	1088	64	0	2	n/a	788	14782	18.7589	0	16	n/a
hsa-miR-145	hsa-miR-145*	0	27	n/a	0	0	n/a	0	151	n/a	0	0	n/a	0	6	n/a	0	0	n/a	0	0	n/a	0	160	n/a	4	204	51	0	2	n/a	94	1825	19.4149	0	0	n/a
hsa-miR-146a	hsa-miR-146a*	0	4053	n/a	0	8146	n/a	6	9856	1642.67	0	7319	n/a	0	3633	n/a	0	28512	n/a	7	41147	5878.14	0	23219	n/a	0	3419	n/a	2	16481	8240.5	0	49	n/a	0	12583	n/a
hsa-miR-148a	hsa-miR-148a*	6	708	118	4	1393	348.25	15	3262	217.467	13	1590	122.308	3	673	224.333	11	2237	203.364	4	774	193.5	4	1569	392.25	12	3769	314.083	3	1488	496	2	403	201.5	10	2091	209.1
hsa-miR-148b	hsa-miR-148b*	3	141	47	4	467	116.75	0	648	n/a	7	1142	163.143	3	302	100.667	3	654	218	0	894	n/a	3	1226	408.667	4	773	193.25	5	620	124	8	478	59.75	8	961	120.125
hsa-miR-154	hsa-miR-154*	0	0	n/a	0	0	n/a	0	0	n/a	0	0	n/a	0	0	n/a	0	0	n/a	0	0	n/a	0	0	n/a	0	0	n/a	0	0	n/a	93	42	0.451613	0	0	n/a
hsa-miR-155	hsa-miR-155*	2	133	66.5	0	9	n/a	0	1483	n/a	0	0	n/a	0	48	n/a	3	914	304.667	0	0	n/a	0	0	n/a	0	0	n/a	0	4	n/a	3	404	134.667	0	21	n/a
hsa-miR-15a	hsa-miR-15a*	0	37	n/a	0	143	n/a	7	394	56.2857	0	139	n/a	0	37	n/a	0	344	n/a	11	684	62.1818	0	399	n/a	0	134	n/a	4	199	49.75	0	173	n/a	0	309	n/a
hsa-miR-15b	hsa-miR-15b*	3	313	104.333	9	713	79.2222	115	2141	18.6174	29	760	26.2069	0	75	n/a	42	1070	25.4762	82	3321	40.5	29	1210	41.7241	11	562	51.0909	53	1197	22.5849	26	519	19.9615	10	602	60.2
hsa-miR-16	hsa-miR-16-1*	0	687	n/a	0	1084	n/a	2	4384	2192	2	1195	597.5	0	416	n/a	0	3157	n/a	2	6120	3060	0	3011	n/a	0	1103	n/a	0	2007	n/a	2	1582	791	0	3862	n/a
hsa-miR-16	hsa-miR-16-2*	0	687	n/a	2	1084	542	7	4384	626.286	7	1195	170.714	0	416	n/a	7	3157	451	7	6120	874.286	3	3011	1003.67	2	1103	551.5	5	2007	401.4	5	1582	316.4	5	3862	772.4
hsa-miR-17	hsa-miR-17*	127	89	0.700787	51	60	1.17647	366	481	1.31421	373	535	1.43432	90	39	0.433333	211	303	1.43602	536	586	1.09328	537	1407	2.62011	216	293	1.35648	779	1216	1.56098	230	120	0.521739	653	447	0.684533
hsa-miR-181a	hsa-miR-181a*	0	1266	n/a	12	1172	97.6667	142	27525	193.838	33	3389	102.697	14	3731	266.5	330	39200	118.788	46	6429	139.761	106	17924	169.094	99	8605	86.9192	64	12553	196.141	69	15853	229.754	99	33387	337.242
hsa-miR-181a	hsa-miR-181a-2*	324	1266	3.90741	375	1172	3.12533	133	27525	206.955	148	3389	22.8986	252	3731	14.8056	369	39200	106.233	203	6429	31.67	82	17924	218.585	74	8605	116.284	75	12553	167.373	787	15853	20.1436	1176	33387	28.3903
hsa-miR-181c	hsa-miR-181c*	4	7	1.75	0	2	n/a	25	70	2.8	6	0	n/a	2	18	9	19	29	1.52632	10	122	12.2	0	11	n/a	12	5	0.416667	9	10	1.11111	15	96	6.4	10	24	2.4
hsa-miR-183	hsa-miR-183*	0	16	n/a	0	0	n/a	0	0	n/a	5	32	6.4	0	0	n/a	0	4	n/a	4	15	3.75	0	0	n/a	0	0	n/a	10	34	3.4	0	0	n/a	0	0	n/a
hsa-miR-185	hsa-miR-185*	69	6468	93.7391	129	11875	92.0543	142	21931	154.444	42	6148	146.381	41	8379	204.366	134	33865	252.724	50	14968	299.36	76	26854	353.342	68	11586	170.382	114	29662	260.193	43	4189	97.4186	297	29381	98.9259
hsa-miR-186	hsa-miR-186*	0	155	n/a	0	668	n/a	5	1215	243	2	539	269.5	0	119	n/a	0	1055	n/a	3	1138	379.333	4	940	235	0	416	n/a	0	644	n/a	0	299	n/a	0	683	n/a
hsa-miR-187	hsa-miR-187*	0	0	n/a	0	0	n/a	0	0	n/a	0	0	n/a	0	0	n/a	0	6	n/a	0	0	n/a	0	21	n/a	0	0	n/a	8	140	17.5	0	0	n/a	0	0	n/a
hsa-miR-18a	hsa-miR-18a*	5	12	2.4	0	12	n/a	6	45	7.5	7	50	7.14286	0	0	n/a	4	23	5.75	4	54	13.5	22	124	5.63636	0	18	n/a	8	129	16.125	0	12	n/a	2	27	13.5
hsa-miR-191	hsa-miR-191*	0	7553	n/a	3	5904	1968	4	12252	3063	0	6339	n/a	2	3875	1937.5	7	12341	1763	0	6119	n/a	2	5197	2598.5	0	10940	n/a	5	10852	2170.4	6	11647	1941.17	2	26524	13262
hsa-miR-193b	hsa-miR-193b*	184	114	0.619565	29	72	2.48276	184	598	3.25	32	41	1.28125	123	40	0.325203	127	139	1.09449	146	765	5.23973	118	485	4.11017	344	288	0.837209	72	140	1.94444	1846	663	0.359155	853	254	0.297773
hsa-miR-196a	hsa-miR-196a*	0	3	n/a	0	36	n/a	0	1031	n/a	0	6	n/a	0	23	n/a	0	5529	n/a	0	1650	n/a	0	974	n/a	0	568	n/a	4	1057	264.25	0	0	n/a	0	98	n/a
hsa-miR-19a	hsa-miR-19a*	0	0	n/a	0	0	n/a	0	10	n/a	0	5	n/a	0	0	n/a	2	4	2	0	8	n/a	0	17	n/a	0	5	n/a	2	22	11	0	0	n/a	0	4	n/a
hsa-miR-19b	hsa-miR-19b-1*	0	35	n/a	0	147	n/a	0	1265	n/a	0	263	n/a	0	6	n/a	0	609	n/a	2	1272	636	2	3086	1543	0	410	n/a	0	1370	n/a	0	77	n/a	0	481	n/a
hsa-miR-20a	hsa-miR-20a*	0	55	n/a	0	23	n/a	0	203	n/a	3	230	76.6667	0	26	n/a	0	164	n/a	0	286	n/a	6	581	96.8333	0	165	n/a	5	550	110	0	63	n/a	4	199	49.75
hsa-miR-20b	hsa-miR-20b*	189	42	0.222222	78	50	0.641026	338	839	2.48225	90	33	0.366667	8	0	n/a	553	591	1.06872	258	860	3.33333	104	311	2.99038	0	0	n/a	0	0	n/a	0	0	n/a	326	131	0.40184
hsa-miR-21	hsa-miR-21*	253	19070	75.3755	157	14112	89.8854	1127	79435	70.4836	109	12448	114.202	88	13673	155.375	1255	101268	80.6916	1564	96146	61.4744	453	40275	88.9073	541	73872	136.547	247	31522	127.619	1212	115651	95.4216	517	58991	114.103
hsa-miR-22	hsa-miR-22*	10	380	38	29	954	32.8966	189	3103	16.418	31	1404	45.2903	52	1330	25.5769	180	3759	20.8833	205	3415	16.6585	88	3034	34.4773	113	1989	17.6018	53	1658	31.283	534	8982	16.8202	246	3021	12.2805
hsa-miR-221	hsa-miR-221*	675	2231	3.30519	1810	3664	2.02431	3566	63206	17.7246	299	4029	13.4749	651	11350	17.4347	1623	39296	24.212	2588	16917	6.53671	1454	17168	11.8074	4004	26526	6.62488	757	24809	32.7728	11602	183144	15.7856	1133	25893	22.8535
hsa-miR-222	hsa-miR-222*	0	1199	n/a	3	2414	804.667	8	16042	2005.25	0	2244	n/a	0	5801	n/a	4	8519	2129.75	0	5902	n/a	0	5494	n/a	6	13258	2209.67	5	6420	1284	43	76524	1779.63	0	9711	n/a
hsa-miR-23a	hsa-miR-23a*	2	1377	688.5	2	3377	1688.5	36	15111	419.75	4	3527	881.75	9	1306	145.111	22	7154	325.182	18	11927	662.611	14	7016	501.143	27	6975	258.333	16	4085	255.312	112	12567	112.205	26	6291	241.962
hsa-miR-23b	hsa-miR-23b*	125	210	1.68	54	422	7.81481	176	1689	9.59659	6	106	17.6667	33	16	0.484848	43	294	6.83721	3	243	81	12	325	27.0833	79	383	4.8481	54	417	7.72222	1612	5639	3.49814	1129	2187	1.93711
hsa-miR-24	hsa-miR-24-2*	0	1057	n/a	0	2541	n/a	3	13315	4438.33	0	1887	n/a	0	2518	n/a	0	7880	n/a	2	6179	3089.5	0	5908	n/a	2	4232	2116	0	5105	n/a	0	10767	n/a	0	8702	n/a
hsa-miR-25	hsa-miR-25*	9283	21508	2.31692	1259	18240	14.4877	1534	34210	22.3012	3991	20663	5.1774	840	5925	7.05357	2282	31640	13.865	1941	28935	14.9073	2153	36058	16.7478	3690	22945	6.21816	1372	14717	10.7267	2090	8459	4.04737	3643	25544	7.0118
hsa-miR-26a	hsa-miR-26a-1*	0	1255	n/a	0	3162	n/a	0	4260	n/a	0	1870	n/a	0	2612	n/a	0	3006	n/a	0	2322	n/a	3	6277	2092.33	0	2550	n/a	2	2481	1240.5	3	6009	2003	0	5242	n/a
hsa-miR-26a	hsa-miR-26a-2*	0	1255	n/a	0	3162	n/a	0	4260	n/a	2	1870	935	0	2612	n/a	0	3006	n/a	0	2322	n/a	0	6277	n/a	0	2550	n/a	0	2481	n/a	0	6009	n/a	2	5242	2621
hsa-miR-26b	hsa-miR-26b*	0	408	n/a	0	1597	n/a	0	3094	n/a	0	1056	n/a	0	742	n/a	2	5071	2535.5	0	1418	n/a	0	2970	n/a	0	1726	n/a	0	981	n/a	0	1952	n/a	0	1475	n/a
hsa-miR-27a	hsa-miR-27a*	22	346	15.7273	10	982	98.2	58	5613	96.7759	22	494	22.4545	20	649	32.45	26	3081	118.5	31	3869	124.806	15	2612	174.133	24	1628	67.8333	10	1647	164.7	157	2528	16.1019	33	1958	59.3333
hsa-miR-27b	hsa-miR-27b*	74	224	3.02703	42	436	10.381	97	1143	11.7835	8	62	7.75	4	66	16.5	27	417	15.4444	12	194	16.1667	23	273	11.8696	38	310	8.15789	30	340	11.3333	533	3587	6.72983	246	2088	8.4878
hsa-miR-29a	hsa-miR-29a*	19	127858	6729.37	2	13202	6601	84	134648	1602.95	0	14053	n/a	2	35611	17805.5	71	195413	2752.3	37	92375	2496.62	62	254467	4104.31	2	42890	21445	7	44127	6303.86	19	113063	5950.68	5	105674	21134.8
hsa-miR-29b	hsa-miR-29b-1*	9	7523	835.889	0	1478	n/a	47	8067	171.638	0	795	n/a	0	1739	n/a	101	9292	92	13	6199	476.846	62	17764	286.516	8	2507	313.375	20	2212	110.6	37	4201	113.541	0	5523	n/a
hsa-miR-29b	hsa-miR-29b-2*	0	7523	n/a	0	1478	n/a	5	8067	1613.4	0	795	n/a	0	1739	n/a	0	9292	n/a	0	6199	n/a	0	17764	n/a	2	2507	1253.5	0	2212	n/a	0	4201	n/a	0	5523	n/a
hsa-miR-29c	hsa-miR-29c*	0	121	n/a	3	67	22.3333	4	456	114	0	179	n/a	0	75	n/a	4	675	168.75	0	225	n/a	2	538	269	0	217	n/a	0	162	n/a	2	244	122	0	189	n/a
hsa-miR-30a	hsa-miR-30a*	167	280	1.67665	750	1245	1.66	2958	7976	2.69642	1503	2723	1.81171	868	2055	2.36751	4948	11058	2.23484	4144	15811	3.8154	1173	4974	4.24041	1999	3549	1.77539	1202	4857	4.04077	2558	3628	1.4183	7055	14155	2.00638
hsa-miR-30b	hsa-miR-30b*	30	48	1.6	30	106	3.53333	46	162	3.52174	54	158	2.92593	14	13	0.928571	55	168	3.05455	131	465	3.54962	50	213	4.26	74	130	1.75676	116	323	2.78448	28	24	0.857143	35	59	1.68571
hsa-miR-30c	hsa-miR-30c-1*	3	25	8.33333	6	124	20.6667	7	185	26.4286	15	135	9	4	63	15.75	32	263	8.21875	10	269	26.9	11	157	14.2727	11	200	18.1818	16	131	8.1875	11	53	4.81818	27	301	11.1481
hsa-miR-30c	hsa-miR-30c-2*	14	25	1.78571	112	124	1.10714	151	185	1.22517	130	135	1.03846	85	63	0.741176	188	263	1.39894	423	269	0.635934	70	157	2.24286	206	200	0.970874	75	131	1.74667	163	53	0.325153	433	301	0.69515
hsa-miR-30d	hsa-miR-30d*	0	3755	n/a	7	3497	499.571	6	9870	1645	2	7484	3742	3	2900	966.667	10	13607	1360.7	10	15107	1510.7	0	10593	n/a	9	9839	1093.22	16	27940	1746.25	0	2072	n/a	7	13263	1894.71
hsa-miR-30e	hsa-miR-30e*	792	151	0.190657	1685	264	0.156677	2193	976	0.445052	1393	288	0.206748	1029	237	0.230321	4560	1585	0.347588	1152	669	0.580729	1707	955	0.559461	2169	430	0.198248	1853	1016	0.5483	1567	179	0.114231	5044	1112	0.22046
hsa-miR-31	hsa-miR-31*	0	2	n/a	0	30	n/a	0	100	n/a	0	0	n/a	0	382	n/a	6	310	51.6667	0	4	n/a	0	0	n/a	4	145	36.25	5	210	42	8	3121	390.125	0	614	n/a
hsa-miR-32	hsa-miR-32*	0	0	n/a	4	25	6.25	9	77	8.55556	2	55	27.5	0	15	n/a	3	49	16.3333	7	52	7.42857	5	55	11	0	15	n/a	6	40	6.66667	0	31	n/a	0	94	n/a
hsa-miR-33a	hsa-miR-33a*	2	81	40.5	0	41	n/a	37	1459	39.4324	9	217	24.1111	0	54	n/a	22	800	36.3636	41	709	17.2927	23	479	20.8261	19	310	16.3158	20	515	25.75	9	130	14.4444	17	652	38.3529
hsa-miR-33b	hsa-miR-33b*	0	0	n/a	0	0	n/a	4	94	23.5	0	7	n/a	0	0	n/a	7	52	7.42857	2	50	25	2	24	12	0	4	n/a	7	121	17.2857	0	5	n/a	0	17	n/a
hsa-miR-34a	hsa-miR-34a*	0	0	n/a	0	3	n/a	0	0	n/a	0	5	n/a	3	2	0.666667	20	322	16.1	0	2	n/a	32	712	22.25	16	54	3.375	16	171	10.6875	20	47	2.35	21	42	2
hsa-miR-34b	hsa-miR-34b*	0	0	n/a	0	0	n/a	11	2	0.181818	0	0	n/a	0	0	n/a	33	11	0.333333	0	0	n/a	3	0	n/a	0	0	n/a	0	0	n/a	7	14	2	0	5	n/a
hsa-miR-374a	hsa-miR-374a*	53	30	0.566038	188	126	0.670213	328	266	0.810976	209	84	0.401914	89	54	0.606742	217	176	0.81106	153	184	1.20261	184	237	1.28804	197	88	0.446701	167	152	0.91018	160	70	0.4375	143	75	0.524476
hsa-miR-374b	hsa-miR-374b*	7	209	29.8571	13	1057	81.3077	17	1118	65.7647	20	1179	58.95	5	104	20.8	18	681	37.8333	9	672	74.6667	9	782	86.8889	5	740	148	7	423	60.4286	11	340	30.9091	9	528	58.6667
hsa-miR-376a	hsa-miR-376a*	0	0	n/a	0	0	n/a	0	0	n/a	0	0	n/a	0	0	n/a	0	0	n/a	0	0	n/a	0	0	n/a	0	0	n/a	0	0	n/a	3	69	23	0	0	n/a
hsa-miR-377	hsa-miR-377*	0	0	n/a	0	0	n/a	0	0	n/a	0	0	n/a	0	0	n/a	0	0	n/a	0	0	n/a	0	0	n/a	0	0	n/a	0	0	n/a	42	12	0.285714	0	0	n/a
hsa-miR-378	hsa-miR-378*	0	37069	n/a	3	12458	4152.67	5	40192	8038.4	0	58068	n/a	0	35030	n/a	2	20201	10100.5	0	49444	n/a	10	70074	7007.4	2	7971	3985.5	0	29141	n/a	0	1803	n/a	6	158112	26352
hsa-miR-379	hsa-miR-379*	0	0	n/a	0	0	n/a	0	0	n/a	0	0	n/a	0	8	n/a	0	3	n/a	0	0	n/a	0	0	n/a	0	0	n/a	0	0	n/a	29	918	31.6552	0	0	n/a
hsa-miR-424	hsa-miR-424*	32	50	1.5625	25	67	2.68	565	3707	6.56106	20	114	5.7	24	18	0.75	60	238	3.96667	100	703	7.03	101	639	6.32673	327	1460	4.46483	31	287	9.25806	1220	2489	2.04016	487	331	0.679671
hsa-miR-425	hsa-miR-425*	0	88	n/a	0	180	n/a	57	498	8.73684	9	73	8.11111	6	17	2.83333	107	463	4.3271	0	439	n/a	15	286	19.0667	8	197	24.625	37	389	10.5135	18	69	3.83333	27	138	5.11111
hsa-miR-431	hsa-miR-431*	0	0	n/a	0	0	n/a	0	0	n/a	0	0	n/a	0	0	n/a	0	0	n/a	0	0	n/a	0	0	n/a	0	0	n/a	0	0	n/a	2	17	8.5	0	0	n/a
hsa-miR-454	hsa-miR-454*	0	8	n/a	2	10	5	0	23	n/a	0	63	n/a	0	2	n/a	2	40	20	4	34	8.5	0	27	n/a	0	16	n/a	0	22	n/a	0	4	n/a	0	42	n/a
hsa-miR-493	hsa-miR-493*	0	0	n/a	0	0	n/a	0	0	n/a	0	0	n/a	6	0	n/a	0	0	n/a	0	0	n/a	0	0	n/a	0	0	n/a	0	0	n/a	441	92	0.208617	0	0	n/a
hsa-miR-505	hsa-miR-505*	5	0	n/a	8	2	0.25	11	27	2.45455	37	0	n/a	24	0	n/a	15	6	0.4	0	9	n/a	5	10	2	10	2	0.2	14	9	0.642857	45	16	0.355556	91	3	0.032967
hsa-miR-550	hsa-miR-550*	4	0	n/a	4	0	n/a	18	2	0.111111	5	0	n/a	0	0	n/a	14	0	n/a	17	2	0.117647	23	0	n/a	8	0	n/a	5	0	n/a	2	0	n/a	11	0	n/a
hsa-miR-551b	hsa-miR-551b*	0	0	n/a	0	0	n/a	4	89	22.25	3	3	1	0	0	n/a	0	2	n/a	0	0	n/a	6	27	4.5	10	2	0.2	5	9	1.8	0	2	n/a	0	0	n/a
hsa-miR-589	hsa-miR-589*	0	10	n/a	8	39	4.875	24	44	1.83333	6	19	3.16667	0	6	n/a	37	211	5.7027	20	48	2.4	13	41	3.15385	14	50	3.57143	6	43	7.16667	7	22	3.14286	14	101	7.21429
hsa-miR-616	hsa-miR-616*	0	0	n/a	0	0	n/a	2	0	n/a	0	0	n/a	2	0	n/a	0	0	n/a	0	0	n/a	0	0	n/a	0	0	n/a	0	0	n/a	0	0	n/a	0	6	n/a
hsa-miR-625	hsa-miR-625*	2	7	3.5	26	14	0.538462	3	17	5.66667	11	3	0.272727	6	4	0.666667	9	25	2.77778	16	21	1.3125	12	20	1.66667	32	24	0.75	0	5	n/a	31	15	0.483871	65	51	0.784615
hsa-miR-629	hsa-miR-629*	0	24	n/a	0	44	n/a	2	133	66.5	0	18	n/a	0	5	n/a	0	94	n/a	2	100	50	0	123	n/a	0	52	n/a	0	50	n/a	0	53	n/a	0	72	n/a
hsa-miR-664	hsa-miR-664*	19	8	0.421053	85	67	0.788235	104	22	0.211538	62	46	0.741935	73	4	0.0547945	139	32	0.230216	41	15	0.365854	105	38	0.361905	140	78	0.557143	35	9	0.257143	94	53	0.56383	195	24	0.123077
hsa-miR-7	hsa-miR-708*	2	71	35.5	0	392	n/a	0	579	n/a	0	202	n/a	2	44	22	0	407	n/a	0	293	n/a	0	333	n/a	5	225	45	0	1617	n/a	17	133	7.82353	0	149	n/a
hsa-miR-708	hsa-miR-7-1*	4	57	14.25	18	2	0.111111	18	8	0.444444	23	0	n/a	2	2	1	18	26	1.44444	25	4	0.16	23	6	0.26087	11	45	4.09091	14	0	n/a	8	160	20	10	0	n/a
hsa-miR-877	hsa-miR-877*	0	57	n/a	0	59	n/a	2	638	319	0	320	n/a	0	81	n/a	0	635	n/a	0	186	n/a	0	220	n/a	0	279	n/a	0	522	n/a	0	346	n/a	0	916	n/a
hsa-miR-9	hsa-miR-9*	2	17	8.5	23	123	5.34783	120	1080	9	120	414	3.45	12	79	6.58333	106	1303	12.2925	15	93	6.2	13	98	7.53846	46	256	5.56522	30	243	8.1	0	0	n/a	4	2	0.5
hsa-miR-92a	hsa-miR-92a-1*	167	9913	59.3593	18	3698	205.444	87	22104	254.069	282	13102	46.461	284	4969	17.4965	209	28593	136.809	114	22853	200.465	347	37847	109.069	234	10421	44.5342	722	39146	54.2188	411	14971	36.4258	905	40926	45.2221
hsa-miR-92a	hsa-miR-92a-2*	37	9913	267.919	4	3698	924.5	47	22104	470.298	15	13102	873.467	2	4969	2484.5	116	28593	246.491	33	22853	692.515	11	37847	3440.64	0	10421	n/a	0	39146	n/a	0	14971	n/a	101	40926	405.208
hsa-miR-92b	hsa-miR-92b*	353	1210	3.42776	183	336	1.83607	446	1475	3.30717	273	1312	4.80586	92	366	3.97826	983	2365	2.4059	457	915	2.00219	225	595	2.64444	190	779	4.1	575	1445	2.51304	1176	5004	4.2551	494	1253	2.53644
hsa-miR-93	hsa-miR-93*	5	1160	232	5	1169	233.8	23	8752	380.522	20	2296	114.8	0	184	n/a	18	7491	416.167	8	6415	801.875	21	11539	549.476	17	2820	165.882	15	4933	328.867	3	742	247.333	6	1654	275.667
hsa-miR-99a	hsa-miR-99a*	0	98	n/a	0	85	n/a	33	956	28.9697	0	281	n/a	0	13	n/a	0	64	n/a	0	9	n/a	8	295	36.875	0	58	n/a	2	31	15.5	3	124	41.3333	5	189	37.8
hsa-miR-99b	hsa-miR-99b*	19	1019	53.6316	22	600	27.2727	404	2580	6.38614	132	4675	35.4167	33	1700	51.5152	606	4335	7.15347	153	1488	9.72549	164	2439	14.872	60	1700	28.3333	189	1553	8.21693	249	6464	25.9598	355	8895	25.0563

## Sheet: equivalent ratios
Known Mature miRNA	Known Mature-star_ miRNA	D10_star	D10	Ratio	D11_star	D11	Ratio	D20_star	D20	Ratio	MEL202_star	MEL202	Ratio	MELB_star	MELB	Ratio	MM386_star	MM386	Ratio	MM426_star	MM426	Ratio	MM466_star	MM466	Ratio	MM472_star	MM472	Ratio	MM603_star	MM603	Ratio	MM653_star	MM653	Ratio	QF1160MB_star	QF1160MB	Ratio
hsa-miR-1228	hsa-miR-1228*	0	0	n/a	0	0	n/a	2	0	n/a	0	0	n/a	0	0	n/a	0	0	n/a	0	0	n/a	0	0	n/a	0	0	n/a	0	0	n/a	14	0	n/a	2	2	1
hsa-miR-135b	hsa-miR-135b*	0	2	n/a	0	2	n/a	0	17	n/a	0	9	n/a	2	0	n/a	28	133	4.75	2	25	12.5	7	22	3.14286	23	311	13.5217	12	19	1.58333	0	0	n/a	0	0	n/a
hsa-miR-17	hsa-miR-17*	127	89	0.700787	51	60	1.17647	366	481	1.31421	373	535	1.43432	90	39	0.433333	211	303	1.43602	536	586	1.09328	537	1407	2.62011	216	293	1.35648	779	1216	1.56098	230	120	0.521739	653	447	0.684533
hsa-miR-181c	hsa-miR-181c*	4	7	1.75	0	2	n/a	25	70	2.8	6	0	n/a	2	18	9	19	29	1.52632	10	122	12.2	0	11	n/a	12	5	0.416667	9	10	1.11111	15	96	6.4	10	24	2.4
hsa-miR-193b	hsa-miR-193b*	184	114	0.619565	29	72	2.48276	184	598	3.25	32	41	1.28125	123	40	0.325203	127	139	1.09449	146	765	5.23973	118	485	4.11017	344	288	0.837209	72	140	1.94444	1846	663	0.359155	853	254	0.297773
hsa-miR-19a	hsa-miR-19a*	0	0	n/a	0	0	n/a	0	10	n/a	0	5	n/a	0	0	n/a	2	4	2	0	8	n/a	0	17	n/a	0	5	n/a	2	22	11	0	0	n/a	0	4	n/a
hsa-miR-20b	hsa-miR-20b*	189	42	0.222222	78	50	0.641026	338	839	2.48225	90	33	0.366667	8	0	n/a	553	591	1.06872	258	860	3.33333	104	311	2.99038	0	0	n/a	0	0	n/a	0	0	n/a	326	131	0.40184
hsa-miR-221	hsa-miR-221*	675	2231	3.30519	1810	3664	2.02431	3566	63206	17.7246	299	4029	13.4749	651	11350	17.4347	1623	39296	24.212	2588	16917	6.53671	1454	17168	11.8074	4004	26526	6.62488	757	24809	32.7728	11602	183144	15.7856	1133	25893	22.8535
hsa-miR-23b	hsa-miR-23b*	125	210	1.68	54	422	7.81481	176	1689	9.59659	6	106	17.6667	33	16	0.484848	43	294	6.83721	3	243	81	12	325	27.0833	79	383	4.8481	54	417	7.72222	1612	5639	3.49814	1129	2187	1.93711
hsa-miR-30a	hsa-miR-30a*	167	280	1.67665	750	1245	1.66	2958	7976	2.69642	1503	2723	1.81171	868	2055	2.36751	4948	11058	2.23484	4144	15811	3.8154	1173	4974	4.24041	1999	3549	1.77539	1202	4857	4.04077	2558	3628	1.4183	7055	14155	2.00638
hsa-miR-30b	hsa-miR-30b*	30	48	1.6	30	106	3.53333	46	162	3.52174	54	158	2.92593	14	13	0.928571	55	168	3.05455	131	465	3.54962	50	213	4.26	74	130	1.75676	116	323	2.78448	28	24	0.857143	35	59	1.68571
hsa-miR-30c	hsa-miR-30c-2*	14	25	1.78571	112	124	1.10714	151	185	1.22517	130	135	1.03846	85	63	0.741176	188	263	1.39894	423	269	0.635934	70	157	2.24286	206	200	0.970874	75	131	1.74667	163	53	0.325153	433	301	0.69515
hsa-miR-34a	hsa-miR-34a*	0	0	n/a	0	3	n/a	0	0	n/a	0	5	n/a	3	2	0.666667	20	322	16.1	0	2	n/a	32	712	22.25	16	54	3.375	16	171	10.6875	20	47	2.35	21	42	2
hsa-miR-34b	hsa-miR-34b*	0	0	n/a	0	0	n/a	11	2	0.181818	0	0	n/a	0	0	n/a	33	11	0.333333	0	0	n/a	3	0	n/a	0	0	n/a	0	0	n/a	7	14	2	0	5	n/a
hsa-miR-374a	hsa-miR-374a*	53	30	0.566038	188	126	0.670213	328	266	0.810976	209	84	0.401914	89	54	0.606742	217	176	0.81106	153	184	1.20261	184	237	1.28804	197	88	0.446701	167	152	0.91018	160	70	0.4375	143	75	0.524476
hsa-miR-424	hsa-miR-424*	32	50	1.5625	25	67	2.68	565	3707	6.56106	20	114	5.7	24	18	0.75	60	238	3.96667	100	703	7.03	101	639	6.32673	327	1460	4.46483	31	287	9.25806	1220	2489	2.04016	487	331	0.679671
hsa-miR-505	hsa-miR-505*	5	0	n/a	8	2	0.25	11	27	2.45455	37	0	n/a	24	0	n/a	15	6	0.4	0	9	n/a	5	10	2	10	2	0.2	14	9	0.642857	45	16	0.355556	91	3	0.032967
hsa-miR-551b	hsa-miR-551b*	0	0	n/a	0	0	n/a	4	89	22.25	3	3	1	0	0	n/a	0	2	n/a	0	0	n/a	6	27	4.5	10	2	0.2	5	9	1.8	0	2	n/a	0	0	n/a
hsa-miR-589	hsa-miR-589*	0	10	n/a	8	39	4.875	24	44	1.83333	6	19	3.16667	0	6	n/a	37	211	5.7027	20	48	2.4	13	41	3.15385	14	50	3.57143	6	43	7.16667	7	22	3.14286	14	101	7.21429
hsa-miR-625	hsa-miR-625*	2	7	3.5	26	14	0.538462	3	17	5.66667	11	3	0.272727	6	4	0.666667	9	25	2.77778	16	21	1.3125	12	20	1.66667	32	24	0.75	0	5	n/a	31	15	0.483871	65	51	0.784615
hsa-miR-664	hsa-miR-664*	19	8	0.421053	85	67	0.788235	104	22	0.211538	62	46	0.741935	73	4	0.0547945	139	32	0.230216	41	15	0.365854	105	38	0.361905	140	78	0.557143	35	9	0.257143	94	53	0.56383	195	24	0.123077
hsa-miR-708	hsa-miR-7-1*	4	57	14.25	18	2	0.111111	18	8	0.444444	23	0	n/a	2	2	1	18	26	1.44444	25	4	0.16	23	6	0.26087	11	45	4.09091	14	0	n/a	8	160	20	10	0	n/a
hsa-miR-92b	hsa-miR-92b*	353	1210	3.42776	183	336	1.83607	446	1475	3.30717	273	1312	4.80586	92	366	3.97826	983	2365	2.4059	457	915	2.00219	225	595	2.64444	190	779	4.1	575	1445	2.51304	1176	5004	4.2551	494	1253	2.53644

## Sheet: mir_star higher than mature
Known Mature miRNA	Known Mature-star_ miRNA	D10_star	D10	Ratio	D11_star	D11	Ratio	D20_star	D20	Ratio	MEL202_star	MEL202	Ratio	MELB_star	MELB	Ratio	MM386_star	MM386	Ratio	MM426_star	MM426	Ratio	MM466_star	MM466	Ratio	MM472_star	MM472	Ratio	MM603_star	MM603	Ratio	MM653_star	MM653	Ratio	QF1160MB_star	QF1160MB	Ratio
hsa-miR-154	hsa-miR-154*	0	0	n/a	0	0	n/a	0	0	n/a	0	0	n/a	0	0	n/a	0	0	n/a	0	0	n/a	0	0	n/a	0	0	n/a	0	0	n/a	93	42	0.451613	0	0	n/a
hsa-miR-17	hsa-miR-17*	127	89	0.700787	51	60	1.17647	366	481	1.31421	373	535	1.43432	90	39	0.433333	211	303	1.43602	536	586	1.09328	537	1407	2.62011	216	293	1.35648	779	1216	1.56098	230	120	0.521739	653	447	0.684533
hsa-miR-181c	hsa-miR-181c*	4	7	1.75	0	2	n/a	25	70	2.8	6	0	n/a	2	18	9	19	29	1.52632	10	122	12.2	0	11	n/a	12	5	0.416667	9	10	1.11111	15	96	6.4	10	24	2.4
hsa-miR-193b	hsa-miR-193b*	184	114	0.619565	29	72	2.48276	184	598	3.25	32	41	1.28125	123	40	0.325203	127	139	1.09449	146	765	5.23973	118	485	4.11017	344	288	0.837209	72	140	1.94444	1846	663	0.359155	853	254	0.297773
hsa-miR-20b	hsa-miR-20b*	189	42	0.222222	78	50	0.641026	338	839	2.48225	90	33	0.366667	8	0	n/a	553	591	1.06872	258	860	3.33333	104	311	2.99038	0	0	n/a	0	0	n/a	0	0	n/a	326	131	0.40184
hsa-miR-23b	hsa-miR-23b*	125	210	1.68	54	422	7.81481	176	1689	9.59659	6	106	17.6667	33	16	0.484848	43	294	6.83721	3	243	81	12	325	27.0833	79	383	4.8481	54	417	7.72222	1612	5639	3.49814	1129	2187	1.93711
hsa-miR-30c	hsa-miR-30c-2*	14	25	1.78571	112	124	1.10714	151	185	1.22517	130	135	1.03846	85	63	0.741176	188	263	1.39894	423	269	0.635934	70	157	2.24286	206	200	0.970874	75	131	1.74667	163	53	0.325153	433	301	0.69515
hsa-miR-30e	hsa-miR-30e*	792	151	0.190657	1685	264	0.156677	2193	976	0.445052	1393	288	0.206748	1029	237	0.230321	4560	1585	0.347588	1152	669	0.580729	1707	955	0.559461	2169	430	0.198248	1853	1016	0.5483	1567	179	0.114231	5044	1112	0.22046
hsa-miR-34a	hsa-miR-34a*	0	0	n/a	0	3	n/a	0	0	n/a	0	5	n/a	3	2	0.666667	20	322	16.1	0	2	n/a	32	712	22.25	16	54	3.375	16	171	10.6875	20	47	2.35	21	42	2
hsa-miR-34b	hsa-miR-34b*	0	0	n/a	0	0	n/a	11	2	0.181818	0	0	n/a	0	0	n/a	33	11	0.333333	0	0	n/a	3	0	n/a	0	0	n/a	0	0	n/a	7	14	2	0	5	n/a
hsa-miR-374a	hsa-miR-374a*	53	30	0.566038	188	126	0.670213	328	266	0.810976	209	84	0.401914	89	54	0.606742	217	176	0.81106	153	184	1.20261	184	237	1.28804	197	88	0.446701	167	152	0.91018	160	70	0.4375	143	75	0.524476
hsa-miR-377	hsa-miR-377*	0	0	n/a	0	0	n/a	0	0	n/a	0	0	n/a	0	0	n/a	0	0	n/a	0	0	n/a	0	0	n/a	0	0	n/a	0	0	n/a	42	12	0.285714	0	0	n/a
hsa-miR-424	hsa-miR-424*	32	50	1.5625	25	67	2.68	565	3707	6.56106	20	114	5.7	24	18	0.75	60	238	3.96667	100	703	7.03	101	639	6.32673	327	1460	4.46483	31	287	9.25806	1220	2489	2.04016	487	331	0.679671
hsa-miR-493	hsa-miR-493*	0	0	n/a	0	0	n/a	0	0	n/a	0	0	n/a	6	0	n/a	0	0	n/a	0	0	n/a	0	0	n/a	0	0	n/a	0	0	n/a	441	92	0.208617	0	0	n/a
hsa-miR-505	hsa-miR-505*	5	0	n/a	8	2	0.25	11	27	2.45455	37	0	n/a	24	0	n/a	15	6	0.4	0	9	n/a	5	10	2	10	2	0.2	14	9	0.642857	45	16	0.355556	91	3	0.032967
hsa-miR-550	hsa-miR-550*	4	0	n/a	4	0	n/a	18	2	0.111111	5	0	n/a	0	0	n/a	14	0	n/a	17	2	0.117647	23	0	n/a	8	0	n/a	5	0	n/a	2	0	n/a	11	0	n/a
hsa-miR-551b	hsa-miR-551b*	0	0	n/a	0	0	n/a	4	89	22.25	3	3	1	0	0	n/a	0	2	n/a	0	0	n/a	6	27	4.5	10	2	0.2	5	9	1.8	0	2	n/a	0	0	n/a
hsa-miR-625	hsa-miR-625*	2	7	3.5	26	14	0.538462	3	17	5.66667	11	3	0.272727	6	4	0.666667	9	25	2.77778	16	21	1.3125	12	20	1.66667	32	24	0.75	0	5	n/a	31	15	0.483871	65	51	0.784615
hsa-miR-664	hsa-miR-664*	19	8	0.421053	85	67	0.788235	104	22	0.211538	62	46	0.741935	73	4	0.0547945	139	32	0.230216	41	15	0.365854	105	38	0.361905	140	78	0.557143	35	9	0.257143	94	53	0.56383	195	24	0.123077
hsa-miR-708	hsa-miR-7-1*	4	57	14.25	18	2	0.111111	18	8	0.444444	23	0	n/a	2	2	1	18	26	1.44444	25	4	0.16	23	6	0.26087	11	45	4.09091	14	0	n/a	8	160	20	10	0	n/a
hsa-miR-9	hsa-miR-9*	2	17	8.5	23	123	5.34783	120	1080	9	120	414	3.45	12	79	6.58333	106	1303	12.2925	15	93	6.2	13	98	7.53846	46	256	5.56522	30	243	8.1	0	0	n/a	4	2	0.5
