# Supplementary material for: Characterization of the Melanoma miRNAome by Deep Sequencing
Source: PLoS One. 2010 Mar 12;5(3):e9685. doi: 10.1371/journal.pone.0009685 (PMC2837346; doi:10.1371/journal.pone.0009685)
Supplement: Table S6 — Hairpins from known pre-mirs. (0.09 MB XLS) [file pone.0009685.s006.xls]

## Sheet: Sheet1
Suppl Table 17: Hairpin sequences found from the known pre-miRNA sequences
Known Hairpin	QF1160MB_raw count	QF1160MB_Proportion	MELB_raw count	MELB_Proportion	MM653_raw count	MM653_Proportion	D20_raw count	D20_Proportion	MM386_raw count	MM386_Proportion	MM426_raw count	MM426_Proportion	MM466_raw count	MM466_Proportion	MM603_raw count	MM603_Proportion	MM472_raw count	MM472_Proportion	D10_raw count	D10_Proportion	D11_raw count	D11_Proportion	MEL202_raw count	MEL202_Proportion
hsa-let-7a-1	9	7.72665		0	21	14.5682	29	26.223	10	8.08538	9	13.6405	2	1.88235	12	22.0751		0		0		0		0
hsa-let-7a-2	47	40.3503	16	74.5921	95	65.9036	49	44.3078	33	26.6818	14	21.2186	6	5.64706	17	31.273	42	106.464	8	24.3977	2	7.47384	6	14.7929
hsa-let-7a-3	86	73.8324	25	116.55	325	225.46	326	294.783	243	196.475	45	68.2025	106	99.7647	161	296.174	107	271.229	5	15.2486	17	63.5277	165	406.805
hsa-let-7c	23	19.7459	2	9.32401	11	7.63094	205	185.369	10	8.08538		0	26	24.4706	9	16.5563	19	48.1622	15	45.7457	27	100.897	66	162.722
hsa-let-7d	39	33.4821	11	51.2821	13	9.01838	12	10.8509	5	4.04269	5	7.57805		0	21	38.6313	5	12.6743	3	9.14913	9	33.6323	24	59.1716
hsa-let-7e	19	16.3118	2	9.32401	16	11.0995		0	4	3.23415		0		0		0	6	15.2091		0		0	4	9.86193
hsa-let-7f-1		0		0		0	2	1.80848		0	2	3.03122		0		0		0		0	2	7.47384		0
hsa-let-7f-2	455	390.625	158	736.597	196	135.969	237	214.305	167	135.026	83	125.796	113	106.353	175	321.928	263	666.667	59	179.933	111	414.798	191	470.907
hsa-let-7g	189	162.26	57	265.734	95	65.9036	121	109.413	148	119.664	72	109.124	11	10.3529	182	334.805	76	192.649	22	67.0936	127	474.589	122	300.789
hsa-let-7i	113	97.0124	15	69.9301	16	11.0995	57	51.5417	62	50.1294	20	30.3122		0	16	29.4334	15	38.0228		0	10	37.3692	2	4.93097
hsa-mir-103-1	18	15.4533	3	13.986	9	6.2435	5	4.5212	3	2.42561		0	3	2.82353	10	18.3959	7	17.744		0		0	4	9.86193
hsa-mir-103-2	2	1.71703	2	9.32401		0	2	1.80848	2	1.61708	2	3.03122	8	7.52941	2	3.67918	4	10.1394		0		0		0
hsa-mir-106a	4	3.43407		0		0	10	9.04241	11	8.89392	10	15.1561	4	3.76471		0		0	2	6.09942		0		0
hsa-mir-106b	28	24.0385	2	9.32401	7	4.85605	33	29.8399	12	9.70246	94	142.467	21	19.7647	6	11.0375	12	30.4183	51	155.535	57	213.004	15	36.9822
hsa-mir-107		0	4	18.648		0		0		0		0		0		0		0		0		0		0
hsa-mir-10a	53	45.5014	8	37.296	3	2.08117	4	3.61696	3	2.42561	4	6.06244		0	4	7.35835	11	27.8834	5	15.2486	3	11.2108		0
hsa-mir-1181	3	2.57555		0	5	3.46861		0		0	4	6.06244		0		0		0		0		0	2	4.93097
hsa-mir-1185-1		0	9	41.958	905	627.818		0		0		0		0		0		0		0		0		0
hsa-mir-1185-2		0	4	18.648	279	193.548		0		0		0		0		0		0		0		0		0
hsa-mir-1226		0		0	2	1.38744		0	3	2.42561	2	3.03122		0		0		0		0		0	2	4.93097
hsa-mir-1234		0	2	9.32401		0		0		0		0		0		0		0		0		0		0
hsa-mir-1249	24	20.6044	5	23.31		0	6	5.42545		0		0		0		0		0	2	6.09942	2	7.47384		0
hsa-mir-1254	29	24.897		0	9	6.2435	10	9.04241	12	9.70246	2	3.03122	2	1.88235	4	7.35835		0	3	9.14913	3	11.2108	6	14.7929
hsa-mir-1259	2	1.71703	2	9.32401	25	17.343	9	8.13817	7	5.65977	18	27.281	33	31.0588	14	25.7542	45	114.068	10	30.4971	42	156.951	10	24.6548
hsa-mir-125b-1		0		0	29	20.1179	7	6.32969	2	1.61708	2	3.03122		0		0		0		0		0		0
hsa-mir-125b-2		0		0		0	2	1.80848		0		0		0		0		0		0		0		0
hsa-mir-126		0		0		0		0		0		0		0		0		0		0		0	2	4.93097
hsa-mir-1262	27	23.1799	4	18.648	3	2.08117	8	7.23393	14	11.3195	9	13.6405	5	4.70588	4	7.35835		0		0	10	37.3692	6	14.7929
hsa-mir-1269		0		0		0	20	18.0848	5	4.04269		0		0	5	9.19794	73	185.044		0		0		0
hsa-mir-127		0		0	12	8.32466		0		0		0		0		0		0		0		0		0
hsa-mir-1270		0		0	7	4.85605	12	10.8509		0		0		0		0		0		0		0		0
hsa-mir-1272		0		0		0	2	1.80848		0	8	12.1249		0	6	11.0375		0		0		0	2	4.93097
hsa-mir-1273	19	16.3118		0		0	2	1.80848	8	6.46831		0	6	5.64706	5	9.19794		0		0		0		0
hsa-mir-1274a		0		0		0	23	20.7975	8	6.46831	5	7.57805	9	8.47059	6	11.0375		0	2	6.09942		0		0
hsa-mir-1274b	14	12.0192	4	18.648	34	23.5865	290	262.23	170	137.451	141	213.701	182	171.294	153	281.457	7	17.744		0	9	33.6323	4	9.86193
hsa-mir-1275		0		0		0	6	5.42545		0		0		0		0		0		0		0		0
hsa-mir-1278	4	3.43407		0	3	2.08117	2	1.80848	2	1.61708		0		0	3	5.51876		0		0	2	7.47384	5	12.3274
hsa-mir-128-1	5	4.29258		0		0	2	1.80848	2	1.61708		0		0		0		0		0		0		0
hsa-mir-1287		0		0		0	7	6.32969	2	1.61708	2	3.03122		0	2	3.67918		0		0		0		0
hsa-mir-1291		0		0	2	1.38744	21	18.9891	39	31.533	48	72.7493	21	19.7647	24	44.1501		0		0		0		0
hsa-mir-129-1	2	1.71703	2	9.32401		0		0		0		0		0		0		0		0		0	29	71.499
hsa-mir-1297		0		0		0	4	3.61696	2	1.61708	4	6.06244		0		0		0		0		0		0
hsa-mir-1300	15	12.8777		0		0		0		0		0		0		0		0		0		0		0
hsa-mir-1301		0		0		0		0	2	1.61708		0	4	3.76471	2	3.67918		0		0		0		0
hsa-mir-1303	15	12.8777	2	9.32401	8	5.54977	17	15.3721	4	3.23415	32	48.4995	21	19.7647	15	27.5938	6	15.2091	2	6.09942	2	7.47384	7	17.2584
hsa-mir-1304	58	49.794	6	27.972	20	13.8744	15	13.5636	18	14.5537	17	25.7654	7	6.58824	10	18.3959		0	5	15.2486	2	7.47384	11	27.1203
hsa-mir-1306	22	18.8874		0	18	12.487	17	15.3721	21	16.9793	7	10.6093	8	7.52941	17	31.273	11	27.8834	3	9.14913	9	33.6323	12	29.5858
hsa-mir-1307	1355	1163.29	121	564.103	501	347.555	1365	1234.29	2545	2057.73	984	1491.36	593	558.118	1272	2339.96	371	940.431	212	646.539	331	1236.92	688	1696.25
hsa-mir-1308		0		0	2	1.38744		0		0		0		0		0		0		0		0		0
hsa-mir-130a		0		0	8	5.54977	9	8.13817	6	4.85123		0	2	1.88235		0	9	22.8137		0		0	9	22.1893
hsa-mir-130b	3	2.57555	3	13.986	5	3.46861	2	1.80848		0		0		0		0		0		0		0		0
hsa-mir-132		0		0	2	1.38744		0		0		0		0		0		0		0		0		0
hsa-mir-134		0		0	5	3.46861		0		0		0		0		0		0		0		0		0
hsa-mir-136		0		0	5	3.46861		0		0		0		0		0		0		0		0		0
hsa-mir-137		0		0	16	11.0995		0		0		0		0		0		0		0		0		0
hsa-mir-138-1	2	1.71703		0	14	9.71211	3	2.71272	6	4.85123		0	2	1.88235	7	12.8771		0		0		0		0
hsa-mir-139		0		0		0	30	27.1272	13	10.511		0		0	5	9.19794		0		0		0		0
hsa-mir-140	12	10.3022	3	13.986	14	9.71211	10	9.04241	5	4.04269		0	2	1.88235		0	17	43.0925		0		0	4	9.86193
hsa-mir-143		0		0	143	99.2022		0		0		0		0		0	4	10.1394		0		0		0
hsa-mir-146a	76	65.2473	33	153.846		0	47	42.4993	123	99.4502	180	272.81	77	72.4706	74	136.13	4	10.1394	19	57.9445	47	175.635	44	108.481
hsa-mir-146b	7	6.00962		0		0	8	7.23393	19	15.3622	22	33.3434	7	6.58824	11	20.2355		0		0	8	29.8954	7	17.2584
hsa-mir-148a		0		0		0	3	2.71272		0	2	3.03122		0		0		0		0		0	2	4.93097
hsa-mir-148b	72	61.8132	8	37.296	17	11.7933	24	21.7018	28	22.6391	29	43.9527	30	28.2353	36	66.2252	18	45.6274	2	6.09942	4	14.9477	61	150.394
hsa-mir-151	566	485.92	137	638.695	249	172.737	74	66.9138	102	82.4709	82	124.28	114	107.294	182	334.805	111	281.369	78	237.877	58	216.741	601	1481.76
hsa-mir-152		0		0	9	6.2435		0	6	4.85123		0	4	3.76471	2	3.67918		0		0		0	4	9.86193
hsa-mir-15b		0		0		0	3	2.71272		0		0		0		0		0		0		0		0
hsa-mir-16-2	77	66.1058	20	93.2401	33	22.8928	37	33.4569	15	12.1281	24	36.3747	10	9.41176	10	18.3959	12	30.4183	10	30.4971	7	26.1584	19	46.8442
hsa-mir-17		0		0		0	3	2.71272		0	7	10.6093	11	10.3529	16	29.4334		0		0		0	3	7.39645
hsa-mir-181a-1	2	1.71703		0		0	4	3.61696	8	6.46831	2	3.03122		0		0		0		0		0	2	4.93097
hsa-mir-181a-2	44	37.7747	2	9.32401	30	20.8117	6	5.42545	18	14.5537	21	31.8278	4	3.76471	7	12.8771		0	16	48.7954	61	227.952	6	14.7929
hsa-mir-181b-1	41	35.1992	7	32.634	32	22.1991	67	60.5841	81	65.4916	5	7.57805	15	14.1176	39	71.7439	72	182.51		0	2	7.47384	47	115.878
hsa-mir-181b-2	7	6.00962		0	7	4.85605	30	27.1272	53	42.8525		0	7	6.58824	22	40.4709	4	10.1394		0		0		0
hsa-mir-1826	1464	1256.87	141	657.343	116	80.4717	390	352.654	555	448.739	321	486.511	456	429.176	217	399.191	11	27.8834	22	67.0936	25	93.423	12	29.5858
hsa-mir-1827	5	4.29258		0		0		0		0		0		0		0		0		0		0		0
hsa-mir-185	38	32.6236	6	27.972	2	1.38744	15	13.5636	21	16.9793	4	6.06244	16	15.0588	9	16.5563		0	4	12.1988	5	18.6846	3	7.39645
hsa-mir-186	5	4.29258		0	2	1.38744	22	19.8933	24	19.4049	19	28.7966	9	8.47059	12	22.0751	6	15.2091		0	4	14.9477	4	9.86193
hsa-mir-187		0		0		0		0		0		0		0	2	3.67918		0		0		0		0
hsa-mir-18b		0		0		0	2	1.80848	3	2.42561		0	4	3.76471		0		0		0		0	3	7.39645
hsa-mir-192	4	3.43407		0	4	2.77489		0	6	4.85123	2	3.03122	2	1.88235	4	7.35835		0		0		0	3	7.39645
hsa-mir-193a	9	7.72665		0	13	9.01838	2	1.80848		0		0		0		0		0		0		0		0
hsa-mir-193b	55	47.2184	2	9.32401	26	18.0368	2	1.80848	6	4.85123	2	3.03122	7	6.58824	2	3.67918		0	2	6.09942		0		0
hsa-mir-195		0		0	68	47.1731	4	3.61696	6	4.85123	2	3.03122		0	18	33.1126		0		0	2	7.47384	37	91.2229
hsa-mir-196a-2	29	24.897	7	32.634		0		0	5	4.04269	17	25.7654	13	12.2353	20	36.7918		0		0	5	18.6846		0
hsa-mir-196b		0		0		0	5	4.5212	4	3.23415	7	10.6093	7	6.58824		0		0		0		0	2	4.93097
hsa-mir-197	115	98.7294	4	18.648	38	26.3614	31	28.0315	19	15.3622	5	7.57805	8	7.52941	25	45.9897	10	25.3485	2	6.09942	3	11.2108	4	9.86193
hsa-mir-199a-1		0		0	2	1.38744		0		0		0		0		0		0		0		0		0
hsa-mir-199a-2		0		0	2	1.38744		0		0		0		0		0		0		0		0		0
hsa-mir-19a		0		0		0		0	2	1.61708		0	6	5.64706	2	3.67918		0		0		0	2	4.93097
hsa-mir-19b-2		0		0		0	3	2.71272		0		0		0		0		0		0		0		0
hsa-mir-204	4	3.43407		0		0		0	60	48.5123	3	4.54683	72	67.7647	9	16.5563	29	73.5108	44	134.187	65	242.9		0
hsa-mir-20b	2	1.71703		0		0	4	3.61696	5	4.04269	17	25.7654	2	1.88235		0		0		0	2	7.47384	2	4.93097
hsa-mir-21	195	167.411	19	88.5781	303	210.198	251	226.964	313	253.072	274	415.277	113	106.353	81	149.007	185	468.948	58	176.883	39	145.74	41	101.085
hsa-mir-210	10	8.58516		0		0	26	23.5103	3	2.42561		0		0	7	12.8771		0		0	2	7.47384		0
hsa-mir-211	22	18.8874	2	9.32401		0	2	1.80848	105	84.8965	6	9.09366	28	26.3529	10	18.3959		0	2	6.09942	8	29.8954		0
hsa-mir-212	40	34.3407	117	545.455	53	36.7673	4	3.61696	10	8.08538	2	3.03122	4	3.76471	15	27.5938	9	22.8137	6	18.2983	9	33.6323	45	110.947
hsa-mir-214		0		0	127	88.1027		0		0		0		0		0		0		0		0		0
hsa-mir-217		0		0		0		0	2	1.61708		0		0		0		0		0		0		0
hsa-mir-218-1		0		0	4	2.77489		0		0		0		0		0		0		0		0		0
hsa-mir-218-2		0		0	6	4.16233		0		0		0		0		0		0		0		0		0
hsa-mir-22		0		0	5	3.46861		0		0		0		0		0		0		0		0		0
hsa-mir-221	164	140.797	47	219.114	478	331.599	182	164.572	144	116.429	108	163.686	105	98.8235	45	82.7815	216	547.529	17	51.8451	60	224.215	15	36.9822
hsa-mir-222	2	1.71703		0	48	33.2986		0	11	8.89392	3	4.54683		0	3	5.51876	5	12.6743		0		0		0
hsa-mir-224		0		0	2	1.38744		0	2	1.61708		0		0		0		0		0		0		0
hsa-mir-23a	32	27.4725	5	23.31	38	26.3614	108	97.658	46	37.1928	70	106.093	53	49.8824	29	53.3481	8	20.2788	4	12.1988	9	33.6323	13	32.0513
hsa-mir-23b	39	33.4821		0	65	45.0919	5	4.5212	2	1.61708		0		0	2	3.67918		0		0		0		0
hsa-mir-25		0		0		0		0		0	2	3.03122		0		0		0		0		0		0
hsa-mir-27a		0		0	4	2.77489		0		0		0	2	1.88235		0		0		0		0		0
hsa-mir-27b	48	41.2088		0	77	53.4166	8	7.23393	7	5.65977		0	2	1.88235		0		0	9	27.4474		0		0
hsa-mir-28	2	1.71703		0		0	2	1.80848	2	1.61708		0		0		0		0		0	2	7.47384	2	4.93097
hsa-mir-296	2	1.71703		0		0	20	18.0848	13	10.511	6	9.09366	7	6.58824	4	7.35835		0	2	6.09942		0		0
hsa-mir-299		0	2	9.32401	33	22.8928		0		0		0		0		0		0		0		0		0
hsa-mir-29a	1234	1059.41	404	1883.45	1654	1147.42	3698	3343.88	4465	3610.12	2155	3266.14	4885	4597.65	1165	2143.12	803	2035.49	1314	4007.32	595	2223.47	315	776.627
hsa-mir-29b-1		0	5	23.31	52	36.0735	80	72.3393	80	64.6831	51	77.2962	23	21.6471	9	16.5563	7	17.744		0	5	18.6846	4	9.86193
hsa-mir-29b-2		0		0		0	2	1.80848		0		0	3	2.82353	2	3.67918		0	2	6.09942		0		0
hsa-mir-29c		0		0		0	2	1.80848	2	1.61708		0		0		0		0		0		0		0
hsa-mir-301a	63	54.0865	27	125.874	49	33.9924	46	41.5951	208	168.176	22	33.3434	37	34.8235	91	167.403	80	202.788	23	70.1433	67	250.374	358	882.643
hsa-mir-301b	4	3.43407		0		0	4	3.61696		0		0		0	3	5.51876		0		0	2	7.47384	2	4.93097
hsa-mir-30a	7	6.00962		0		0	4	3.61696		0	2	3.03122		0	3	5.51876		0		0		0		0
hsa-mir-30b		0		0		0	3	2.71272	2	1.61708	8	12.1249		0	8	14.7167		0		0		0	2	4.93097
hsa-mir-30d	2	1.71703		0		0		0		0		0		0	5	9.19794		0		0		0	2	4.93097
hsa-mir-30e	18	15.4533		0	5	3.46861	7	6.32969	22	17.7878	10	15.1561	7	6.58824	13	23.9146	9	22.8137	4	12.1988	6	22.4215	3	7.39645
hsa-mir-31		0		0	5	3.46861		0		0		0		0		0		0		0		0		0
hsa-mir-32		0		0	2	1.38744		0	5	4.04269		0		0		0		0		0		0		0
hsa-mir-320a	1512	1298.08	187	871.795	961	666.667	465	420.472	143	115.621	194	294.028	178	167.529	171	314.57	246	623.574	272	829.521	174	650.224	474	1168.64
hsa-mir-323		0		0	214	148.456		0		0		0		0		0		0		0		0		0
hsa-mir-324	14	12.0192	6	27.972	16	11.0995	22	19.8933	48	38.8098	14	21.2186	13	12.2353	36	66.2252	16	40.5577		0	2	7.47384	12	29.5858
hsa-mir-329-1		0		0	2	1.38744		0		0		0		0		0		0		0		0		0
hsa-mir-331		0		0		0	4	3.61696	6	4.85123		0		0	3	5.51876		0		0	2	7.47384		0
hsa-mir-337		0		0	2	1.38744		0		0		0		0		0		0		0		0		0
hsa-mir-33a		0		0		0	3	2.71272		0	2	3.03122		0		0		0		0		0		0
hsa-mir-33b		0		0		0	5	4.5212	22	17.7878		0		0	8	14.7167		0		0		0		0
hsa-mir-340		0		0		0	2	1.80848		0		0	4	3.76471		0		0		0		0	2	4.93097
hsa-mir-34c		0		0	10	6.93722		0	6	4.85123		0		0		0		0		0		0	2	4.93097
hsa-mir-361		0		0		0	6	5.42545		0		0		0		0		0		0		0		0
hsa-mir-363		0		0		0	2	1.80848	2	1.61708	3	4.54683		0		0		0		0		0		0
hsa-mir-365-1	443	380.323	50	233.1	751	520.985	191	172.71	108	87.3221	288	436.496	299	281.412	90	165.563	121	306.717	143	436.109	40	149.477	31	76.43
hsa-mir-365-2	431	370.021	106	494.172	2155	1494.97	137	123.881	306	247.413	8	12.1249	215	202.353	118	217.071	218	552.598	196	597.743	34	127.055	39	96.1538
hsa-mir-369		0		0	2	1.38744		0		0		0		0		0		0		0		0		0
hsa-mir-374a		0		0		0		0		0		0	2	1.88235		0		0		0	4	14.9477		0
hsa-mir-374b		0		0		0	2	1.80848		0		0	2	1.88235		0		0		0		0	5	12.3274
hsa-mir-375		0		0		0		0	4	3.23415		0		0		0		0		0		0		0
hsa-mir-376a-1		0	2	9.32401		0		0		0		0		0		0		0		0		0		0
hsa-mir-376c		0		0	2	1.38744		0		0		0		0		0		0		0		0		0
hsa-mir-378	204	175.137	24	111.888		0	51	46.1163	30	24.2561	40	60.6244	63	59.2941	23	42.3105	7	17.744	17	51.8451	7	26.1584	62	152.86
hsa-mir-379		0		0	2	1.38744		0		0		0		0		0		0		0		0		0
hsa-mir-381		0		0	25	17.343		0		0		0		0		0		0		0		0		0
hsa-mir-383		0		0		0		0		0		0		0		0		0		0		0	12	29.5858
hsa-mir-409		0	4	18.648	288	199.792		0		0		0		0		0		0		0		0		0
hsa-mir-411		0	3	13.986	164	113.77		0		0		0		0		0		0		0		0		0
hsa-mir-421		0		0		0		0	2	1.61708		0		0		0		0		0		0		0
hsa-mir-423	1065	914.32	159	741.259	367	254.596	504	455.737	684	553.04	356	539.557	528	496.941	168	309.051	294	745.247	223	680.085	51	190.583	222	547.337
hsa-mir-424		0		0	3	2.08117	13	11.7551		0	2	3.03122	3	2.82353		0	8	20.2788		0		0		0
hsa-mir-425	29	24.897	5	23.31	7	4.85605	138	124.785	93	75.194	54	81.843	41	38.5882	73	134.29	11	27.8834	10	30.4971	18	67.2646	2	4.93097
hsa-mir-431		0		0	7	4.85605		0		0		0		0		0		0		0		0		0
hsa-mir-433		0		0	2	1.38744		0		0		0		0		0		0		0		0		0
hsa-mir-450a-2		0		0		0		0		0		0		0		0	12	30.4183		0		0		0
hsa-mir-450b	2	1.71703		0		0		0		0		0		0		0		0		0		0		0
hsa-mir-455	6	5.1511		0	73	50.6417	90	81.3817	16	12.9366	6	9.09366	63	59.2941		0	4	10.1394	7	21.348	2	7.47384	2	4.93097
hsa-mir-485		0	3	13.986	148	102.671		0		0		0		0		0		0		0		0		0
hsa-mir-493		0		0	10	6.93722		0		0		0		0		0		0		0		0		0
hsa-mir-494		0		0	7	4.85605		0		0		0		0		0		0		0		0		0
hsa-mir-496		0		0	6	4.16233		0		0		0		0		0		0		0		0		0
hsa-mir-502	4	3.43407		0		0	7	6.32969		0	7	10.6093	8	7.52941		0		0		0		0		0
hsa-mir-503		0		0	3	2.08117	2	1.80848		0		0		0		0		0		0		0		0
hsa-mir-506	279	239.526	53	247.086		0	169	152.817	27	21.8305		0	329	309.647	74	136.13	155	392.902	19	57.9445	9	33.6323		0
hsa-mir-509-3	14	12.0192		0		0	11	9.94665		0		0		0	4	7.35835	4	10.1394		0		0		0
hsa-mir-510		0		0		0	3	2.71272		0		0	8	7.52941		0		0		0		0		0
hsa-mir-513a-1		0		0		0	2	1.80848		0		0	5	4.70588		0		0		0		0		0
hsa-mir-516b-2		0		0		0		0		0		0		0	13	23.9146		0		0		0		0
hsa-mir-517c		0		0		0		0		0		0		0	2	3.67918		0		0		0		0
hsa-mir-532	8	6.86813		0	2	1.38744	38	34.3612	11	8.89392	10	15.1561	6	5.64706	5	9.19794	9	22.8137	6	18.2983	4	14.9477	2	4.93097
hsa-mir-539		0	4	18.648	1582	1097.47		0		0		0		0		0		0		0		0		0
hsa-mir-542	7	6.00962		0	19	13.1807	29	26.223	11	8.89392		0	10	9.41176	12	22.0751	18	45.6274	2	6.09942		0	7	17.2584
hsa-mir-548a-3		0		0		0	9	8.13817	4	3.23415	3	4.54683		0		0		0		0		0		0
hsa-mir-548e		0		0		0		0		0		0		0		0		0		0		0	2	4.93097
hsa-mir-548h-3	2	1.71703		0		0		0		0		0		0		0		0		0		0		0
hsa-mir-548j	5	4.29258		0	3	2.08117	11	9.94665		0	7	10.6093	2	1.88235	10	18.3959		0		0	4	14.9477	5	12.3274
hsa-mir-549		0		0	5	3.46861		0		0		0		0		0		0		0		0		0
hsa-mir-551b		0		0		0	2	1.80848		0		0		0		0		0		0		0		0
hsa-mir-570		0		0	2	1.38744	7	6.32969	3	2.42561		0		0		0		0		0		0		0
hsa-mir-574	2	1.71703		0		0	2	1.80848		0		0		0	2	3.67918		0		0		0		0
hsa-mir-577	3	2.57555		0		0	44	39.7866	6	4.85123	9	13.6405	22	20.7059	18	33.1126		0		0		0		0
hsa-mir-579		0		0		0	2	1.80848	4	3.23415	2	3.03122	2	1.88235		0		0		0		0		0
hsa-mir-584	11	9.44368	4	18.648		0	73	66.0096	45	36.3842	96	145.499	94	88.4706	74	136.13	74	187.579	2	6.09942	55	205.531	31	76.43
hsa-mir-585		0		0	2	1.38744		0		0		0		0		0		0		0		0		0
hsa-mir-590		0		0		0	6	5.42545	2	1.61708		0	3	2.82353		0		0		0		0	3	7.39645
hsa-mir-605	8	6.86813		0	2	1.38744		0		0		0		0		0		0		0		0		0
hsa-mir-616	8	6.86813	7	32.634	5	3.46861	2	1.80848	2	1.61708	2	3.03122	4	3.76471	4	7.35835		0		0		0	3	7.39645
hsa-mir-619	24	20.6044		0	7	4.85605		0	3	2.42561	2	3.03122	2	1.88235	2	3.67918		0		0		0		0
hsa-mir-641		0		0		0		0		0		0		0		0		0		0		0	2	4.93097
hsa-mir-643	4	3.43407		0		0		0		0	3	4.54683	2	1.88235	3	5.51876		0		0		0		0
hsa-mir-652		0		0		0	25	22.606	8	6.46831	27	40.9215	15	14.1176	2	3.67918		0		0	5	18.6846	4	9.86193
hsa-mir-654		0		0	31	21.5054		0		0		0		0		0		0		0		0		0
hsa-mir-657		0		0		0		0		0		0		0	17	31.273		0		0		0		0
hsa-mir-660	9	7.72665		0	3	2.08117	35	31.6484	17	13.7451	17	25.7654	11	10.3529		0		0	4	12.1988	3	11.2108	2	4.93097
hsa-mir-668		0		0	7	4.85605		0		0		0		0		0		0		0		0		0
hsa-mir-671		0		0	2	1.38744		0	3	2.42561		0		0	2	3.67918		0		0		0		0
hsa-mir-708		0		0	4	2.77489		0		0		0		0		0		0		0		0		0
hsa-mir-7-2		0		0		0		0		0		0		0	2	3.67918		0		0		0		0
hsa-mir-720	99	84.9931	9	41.958	51	35.3798	53	47.9248	36	29.1074	17	25.7654	45	42.3529	40	73.5835	20	50.6971	18	54.8948	13	48.58	18	44.3787
hsa-mir-760	4	3.43407		0	2	1.38744	14	12.6594	57	46.0867	5	7.57805	18	16.9412	37	68.0648	5	12.6743		0	4	14.9477	4	9.86193
hsa-mir-765	5	4.29258		0		0	2	1.80848	6	4.85123		0	5	4.70588		0		0		0		0		0
hsa-mir-766	14	12.0192	10	46.62	17	11.7933	48	43.4036	17	13.7451	16	24.2498		0	13	23.9146	4	10.1394	10	30.4971	6	22.4215	9	22.1893
hsa-mir-767		0		0		0	9	8.13817	11	8.89392		0		0		0		0		0		0		0
hsa-mir-769		0		0		0		0		0		0		0		0		0		0		0	2	4.93097
hsa-mir-873		0	2	9.32401		0	64	57.8714		0	247	374.356	51	48	9	16.5563	6	15.2091	5	15.2486	19	71.0015	5	12.3274
hsa-mir-877	2	1.71703		0		0		0		0		0		0	2	3.67918		0		0		0	2	4.93097
hsa-mir-886	145	124.485	38	177.156	875	607.007	479	433.131	362	292.691		0	1191	1120.94		0		0	291	887.466	331	1236.92		0
hsa-mir-887	6	5.1511		0		0	12	10.8509	2	1.61708	12	18.1873	6	5.64706		0		0		0		0		0
hsa-mir-889		0		0	4	2.77489		0		0		0		0		0		0		0		0		0
hsa-mir-9-2		0		0		0		0	2	1.61708		0		0		0		0		0		0		0
hsa-mir-923	72	61.8132	2	9.32401		0		0	2	1.61708	3	4.54683	13	12.2353	2	3.67918		0		0	5	18.6846	2	4.93097
hsa-mir-92a-1	2	1.71703		0		0	2	1.80848	5	4.04269		0		0	2	3.67918		0		0		0		0
hsa-mir-92b	3	2.57555		0	20	13.8744	16	14.4679	28	22.6391	7	10.6093	7	6.58824	10	18.3959	4	10.1394	2	6.09942	3	11.2108	18	44.3787
hsa-mir-93		0		0		0	2	1.80848		0		0		0		0		0		0		0		0
hsa-mir-940		0		0		0	2	1.80848		0		0		0		0		0		0		0		0
hsa-mir-942		0		0		0		0		0	2	3.03122		0		0		0		0	2	7.47384		0
hsa-mir-944		0		0		0		0		0		0		0	2	3.67918		0		0		0		0
hsa-mir-99a		0		0		0	9	8.13817		0		0	8	7.52941		0		0	3	9.14913		0	2	4.93097
hsa-mir-99b		0		0		0		0	2	1.61708		0		0		0		0		0		0		0
Totals	11648	10000	2145	10000	14415	10000	11059	10000	12368	10000	6598	10000	10625	10000	5436	10000	3945	10000	3279	10000	2676	10000	4056	10000
