# Supplementary material for: Characterization of the Melanoma miRNAome by Deep Sequencing
Source: PLoS One. 2010 Mar 12;5(3):e9685. doi: 10.1371/journal.pone.0009685 (PMC2837346; doi:10.1371/journal.pone.0009685)
Supplement: Table S9 — Novel Melanoma miRNA mapped to the genome. (0.09 MB XLS) [file pone.0009685.s009.xls]

## Sheet: Sheet1
Novel Melanoma miRNA	Chr	ProbeStart	ProbeEnd	ChrStrand	GeneStart	GeneEnd	GeneStrand	GeneName	AccnNo	Map-on-gene
MELmiRNA_4	chr1	1465586	1465658	-	1460020	1465603	-	C1orf70	NM_001114748	NA..NA
MELmiRNA_5	chr1	1465590	1465654	+	1460020	1465603	-	C1orf70	NM_001114748	NA..NA
MELmiRNA_6	chr1	2048292	2048364	+	1971768	2106694	+	PRKCZ	NM_002744	Intron_4..Intron_4
MELmiRNA_6	chr1	2048292	2048364	+	1994945	2106694	+	PRKCZ	NM_001033581	Intron_1..Intron_1
MELmiRNA_6	chr1	2048292	2048364	+	2026014	2106694	+	PRKCZ	NM_001033582	Intron_1..Intron_1
MELmiRNA_11	chr1	9950028	9950101	+	9926072	9968143	+	NMNAT1	NM_022787	Intron_1..Intron_1
MELmiRNA_12	chr1	10210363	10210448	+	10193350	10291242	+	KIF1B	NM_183416	Intron_1..Intron_1
MELmiRNA_12	chr1	10210363	10210448	+	10193350	10364248	+	KIF1B	NM_015074	Intron_1..Intron_1
MELmiRNA_16	chr1	23243385	23243452	+	23218527	23282771	+	KDM1	NM_001009999	Intron_2..Intron_2
MELmiRNA_16	chr1	23243385	23243452	+	23218527	23282771	+	KDM1	NM_015013	Intron_2..Intron_2
MELmiRNA_20	chr1	36188623	36188701	+	36169358	36294650	+	EIF2C3	NM_024852	Intron_2..Intron_2
MELmiRNA_20	chr1	36188623	36188701	+	36169358	36294650	+	EIF2C3	NM_177422	Intron_2..Intron_2
MELmiRNA_23	chr1	45122541	45122626	-	45089036	45224869	-	EIF2B3	NM_020365	Intron_6..Intron_6
MELmiRNA_24	chr1	45444150	45444221	-	45254662	45444837	-	ZSWIM5	NM_020883	NA..NA
MELmiRNA_26	chr1	46151776	46151854	+	46041871	46274383	+	MAST2	NM_015112	Intron_4..Intron_4
MELmiRNA_30	chr1	62317046	62317119	+	61980736	62402179	+	INADL	NM_176877	Intron_31..Intron_31
MELmiRNA_31	chr1	62317049	62317116	-	61980736	62402179	+	INADL	NM_176877	Intron_31..Intron_31
MELmiRNA_32	chr1	63739341	63739428	-	63679049	63761423	-	ITGB3BP	NM_014288	Intron_7..Intron_7
MELmiRNA_33	chr1	66866711	66866788	+	66772412	66983356	+	SGIP1	NM_032291	Intron_2..Intron_2
MELmiRNA_45	chr1	116904173	116904252	-	116858679	116915238	-	CD58	NM_001779	Intron_5..Intron_5
MELmiRNA_45	chr1	116904173	116904252	-	116858679	116915238	-	CD58	NR_026665	Intron_5..Intron_5
MELmiRNA_45	chr1	116904173	116904252	-	116862845	116915238	-	CD58	NM_001144822	Intron_4..Intron_4
MELmiRNA_55	chr1	152343621	152343692	-	152231789	152394216	-	NUP210L	NM_207308	Intron_28..Intron_28
MELmiRNA_55	chr1	152343621	152343692	-	152231789	152394216	-	NUP210L	NM_001159484	Intron_26..Intron_26
MELmiRNA_68	chr1	168387143	168387227	-	168381811	168403547	+	METTL11B	NM_001136107	Intron_1..Intron_1
MELmiRNA_69	chr1	168387143	168387227	+	168381811	168403547	+	METTL11B	NM_001136107	Intron_1..Intron_1
MELmiRNA_70	chr1	169343036	169343121	-	169326659	169353583	+	FMO3	NM_006894	Intron_3..Intron_3
MELmiRNA_70	chr1	169343036	169343121	-	169326659	169353583	+	FMO3	NM_001002294	Intron_3..Intron_3
MELmiRNA_71	chr1	170374571	170374651	+	170077243	170648479	+	DNM3	NM_015569	Intron_14..Intron_14
MELmiRNA_71	chr1	170374571	170374651	+	170077243	170648479	+	DNM3	NM_001136127	Intron_14..Intron_14
MELmiRNA_72	chr1	178674072	178674148	-	178523975	178738645	-	ACBD6	NM_032360	Intron_5..Intron_5
MELmiRNA_73	chr1	180627477	180627547	-	180618291	180627573	-	GLUL	NM_001033044	NA..NA
MELmiRNA_73	chr1	180627477	180627547	-	180618291	180627573	-	GLUL	NM_002065	NA..NA
MELmiRNA_79	chr1	199955276	199955358	+	199884072	200062720	+	NAV1	NM_020443	Intron_3..Intron_3
MELmiRNA_82	chr1	210317578	210317650	+	210275541	210344810	+	DTL	NM_016448	Intron_11..Intron_11
MELmiRNA_83	chr1	222652555	222652635	-	222639467	222688355	-	WDR26	NM_001115113	Intron_3..Intron_3
MELmiRNA_83	chr1	222652555	222652635	-	222639467	222688355	-	WDR26	NM_025160	Intron_3..Intron_3
MELmiRNA_84	chr1	224239634	224239705	-	224237025	224253689	-	C1orf55	NM_152608	Exon_1..Exon_1
MELmiRNA_85	chr1	234082913	234082993	-	233890968	234096843	-	LYST	NM_000081	Intron_52..Intron_52
MELmiRNA_86	chr1	235701036	235701120	+	235272324	236063911	+	RYR2	NM_001035	Intron_17..Intron_17
MELmiRNA_87	chr1	239362195	239362269	+	239005439	239587101	-	RGS7	NM_002924	Intron_16..Intron_16
MELmiRNA_92	chr2	11825021	11825102	+	11804190	11884984	+	LPIN1	NM_145693	Intron_2..Intron_2
MELmiRNA_93	chr2	11825022	11825101	+	11804190	11884984	+	LPIN1	NM_145693	Intron_2..Intron_2
MELmiRNA_95	chr2	12794944	12795021	+	12774448	12800309	+	TRIB2	NM_021643	Intron_2..Intron_2
MELmiRNA_95	chr2	12794944	12795021	+	12774448	12800307	+	TRIB2	NR_027303	Intron_2..Intron_2
MELmiRNA_98	chr2	26324220	26324278	+	26321119	26366837	+	HADHB	NM_000183	Intron_1..Intron_1
MELmiRNA_100	chr2	49140237	49140311	+	49043155	49235134	-	FSHR	NM_000145	Intron_8..Intron_8
MELmiRNA_100	chr2	49140237	49140311	+	49043155	49235134	-	FSHR	NM_181446	Intron_7..Intron_7
MELmiRNA_103	chr2	61590291	61590378	-	61558572	61618922	-	XPO1	NM_003400	Intron_21..Intron_21
MELmiRNA_104	chr2	69184318	69184391	+	69093779	69226998	+	ANTXR1	NM_018153	Intron_10..Intron_10
MELmiRNA_104	chr2	69184318	69184391	+	69093779	69253191	+	ANTXR1	NM_053034	Intron_10..Intron_10
MELmiRNA_104	chr2	69184318	69184391	+	69093779	69329961	+	ANTXR1	NM_032208	Intron_10..Intron_10
MELmiRNA_108	chr2	96827742	96827817	+	96790365	96841355	+	CNNM4	NM_020184	Intron_3..Intron_3
MELmiRNA_109	chr2	96827743	96827816	+	96790365	96841355	+	CNNM4	NM_020184	Intron_3..Intron_3
MELmiRNA_110	chr2	100304909	100304984	+	100256184	100305627	-	LONRF2	NM_198461	NA..NA
MELmiRNA_114	chr2	109236844	109236927	+	109112428	109619489	+	SH3RF3	NM_001099289	Intron_1..Intron_1
MELmiRNA_117	chr2	119964966	119965027	+	119913888	119998498	-	SCTR	NM_002980	Intron_11..Intron_11
MELmiRNA_119	chr2	131598644	131598724	+	131578889	131623895	+	PLEKHB2	NM_001100623	Intron_2..Intron_2
MELmiRNA_119	chr2	131598644	131598724	+	131578889	131623895	+	PLEKHB2	NM_017958	Intron_2..Intron_2
MELmiRNA_124	chr2	169147700	169147773	+	169021080	169339398	+	LASS6	NM_203463	Intron_3..Intron_3
MELmiRNA_126	chr2	177828919	177828984	-	177803278	177838105	-	NFE2L2	NM_006164	Intron_4..Intron_4
MELmiRNA_126	chr2	177828919	177828984	-	177803279	177836863	-	NFE2L2	NM_001145413	Intron_4..Intron_4
MELmiRNA_126	chr2	177828919	177828984	-	177803279	177836863	-	NFE2L2	NM_001145412	Intron_4..Intron_4
MELmiRNA_127	chr2	177828920	177828983	-	177803278	177838105	-	NFE2L2	NM_006164	Intron_4..Intron_4
MELmiRNA_127	chr2	177828920	177828983	-	177803279	177836863	-	NFE2L2	NM_001145413	Intron_4..Intron_4
MELmiRNA_127	chr2	177828920	177828983	-	177803279	177836863	-	NFE2L2	NM_001145412	Intron_4..Intron_4
MELmiRNA_130	chr2	189706007	189706082	-	189604885	189752850	-	COL5A2	NM_000393	Intron_53..Intron_53
MELmiRNA_131	chr2	189706008	189706081	-	189604885	189752850	-	COL5A2	NM_000393	Intron_53..Intron_53
MELmiRNA_135	chr2	207356203	207356277	-	207338356	207369154	+	FASTKD2	NM_014929	Intron_7..Intron_7
MELmiRNA_135	chr2	207356203	207356277	-	207338356	207369154	+	FASTKD2	NM_001136194	Intron_7..Intron_7
MELmiRNA_135	chr2	207356203	207356277	-	207338356	207369154	+	FASTKD2	NM_001136193	Intron_7..Intron_7
MELmiRNA_136	chr2	207356203	207356277	+	207338356	207369154	+	FASTKD2	NM_014929	Intron_7..Intron_7
MELmiRNA_136	chr2	207356203	207356277	+	207338356	207369154	+	FASTKD2	NM_001136194	Intron_7..Intron_7
MELmiRNA_136	chr2	207356203	207356277	+	207338356	207369154	+	FASTKD2	NM_001136193	Intron_7..Intron_7
MELmiRNA_137	chr2	207356203	207356277	-	207338356	207369154	+	FASTKD2	NM_014929	Intron_7..Intron_7
MELmiRNA_137	chr2	207356203	207356277	-	207338356	207369154	+	FASTKD2	NM_001136194	Intron_7..Intron_7
MELmiRNA_137	chr2	207356203	207356277	-	207338356	207369154	+	FASTKD2	NM_001136193	Intron_7..Intron_7
MELmiRNA_138	chr2	207356203	207356277	+	207338356	207369154	+	FASTKD2	NM_014929	Intron_7..Intron_7
MELmiRNA_138	chr2	207356203	207356277	+	207338356	207369154	+	FASTKD2	NM_001136194	Intron_7..Intron_7
MELmiRNA_138	chr2	207356203	207356277	+	207338356	207369154	+	FASTKD2	NM_001136193	Intron_7..Intron_7
MELmiRNA_139	chr2	207356205	207356275	-	207338356	207369154	+	FASTKD2	NM_014929	Intron_7..Intron_7
MELmiRNA_139	chr2	207356205	207356275	-	207338356	207369154	+	FASTKD2	NM_001136194	Intron_7..Intron_7
MELmiRNA_139	chr2	207356205	207356275	-	207338356	207369154	+	FASTKD2	NM_001136193	Intron_7..Intron_7
MELmiRNA_140	chr2	207356205	207356275	+	207338356	207369154	+	FASTKD2	NM_014929	Intron_7..Intron_7
MELmiRNA_140	chr2	207356205	207356275	+	207338356	207369154	+	FASTKD2	NM_001136194	Intron_7..Intron_7
MELmiRNA_140	chr2	207356205	207356275	+	207338356	207369154	+	FASTKD2	NM_001136193	Intron_7..Intron_7
MELmiRNA_143	chr2	208327776	208327850	+	208284508	208329139	+	CCNYL1	NM_152523	NA..NA
MELmiRNA_143	chr2	208327776	208327850	+	208284508	208329139	+	CCNYL1	NM_001142300	NA..NA
MELmiRNA_145	chr2	219631645	219631722	-	219627389	219633433	-	IHH	NM_002181	Intron_2..Intron_2
MELmiRNA_146	chr2	219631654	219631716	-	219627389	219633433	-	IHH	NM_002181	Intron_2..Intron_2
MELmiRNA_147	chr2	220122039	220122113	-	220116988	220123561	+	TMEM198	NM_001005209	Intron_3..Intron_3
MELmiRNA_153	chr2	241174834	241174906	+	241174817	241187193	+	CAPN10	NM_023085	Exon_1..Exon_1
MELmiRNA_153	chr2	241174834	241174906	+	241174817	241187193	+	CAPN10	NM_023083	Exon_1..Exon_1
MELmiRNA_153	chr2	241174834	241174906	+	241174817	241187193	+	CAPN10	NM_021251	Exon_1..Exon_1
MELmiRNA_153	chr2	241174834	241174906	+	241174824	241205795	+	CAPN10	NM_023089	Exon_1..Exon_1
MELmiRNA_154	chr2	242065993	242066070	+	241944383	242082928	+	FARP2	NM_014808	Intron_19..Intron_19
MELmiRNA_156	chr3	10346913	10346969	+	10340706	10522268	-	ATP2B2	NM_001683	Intron_1..Intron_1
MELmiRNA_156	chr3	10346913	10346969	+	10340706	10522268	-	ATP2B2	NM_001001331	Intron_1..Intron_1
MELmiRNA_158	chr3	15713809	15713882	-	15683747	15876057	-	ANKRD28	NM_015199	Intron_14..Intron_14
MELmiRNA_161	chr3	20154061	20154137	+	20056527	20170900	+	KAT2B	NM_003884	Intron_12..Intron_12
MELmiRNA_167	chr3	38039382	38039465	+	38023992	38041282	-	PLCD1	NM_001130964	Intron_14..Intron_14
MELmiRNA_167	chr3	38039382	38039465	+	38023992	38041282	-	PLCD1	NR_024071	Intron_13..Intron_13
MELmiRNA_167	chr3	38039382	38039465	+	38023992	38046158	-	PLCD1	NM_006225	Intron_14..Intron_14
MELmiRNA_168	chr3	41255736	41255814	+	41215945	41256943	+	CTNNB1	NM_001904	NA..NA
MELmiRNA_168	chr3	41255736	41255814	+	41215945	41256943	+	CTNNB1	NM_001098209	Exon_15..Exon_15
MELmiRNA_168	chr3	41255736	41255814	+	41215945	41256943	+	CTNNB1	NM_001098210	Exon_15..Exon_15
MELmiRNA_172	chr3	55861572	55861653	-	55517375	56477431	-	ERC2	NM_015576	Intron_4..Intron_4
MELmiRNA_174	chr3	69180799	69180876	-	69151667	69184174	-	TMF1	NM_007114	Intron_16..Intron_16
MELmiRNA_176	chr3	79639728	79639808	+	78729077	79899749	-	ROBO1	NM_002941	Intron_29..Intron_29
MELmiRNA_178	chr3	106771868	106771943	+	106568402	106778434	+	ALCAM	NM_001627	Intron_14..Intron_14
MELmiRNA_180	chr3	117594012	117594070	-	117011831	117647068	-	LSAMP	NM_002338	Intron_6..Intron_6
MELmiRNA_182	chr3	125933976	125934053	+	125931902	125946730	+	UMPS	NM_000373	Intron_1..Intron_1
MELmiRNA_183	chr3	127760006	127760072	-	127751208	127760448	-	C3orf22	NM_152533	Intron_3..Intron_3
MELmiRNA_189	chr3	196336524	196336598	-	196270301	196473184	-	C3orf21	NM_152531	Intron_1..Intron_1
MELmiRNA_191	chr4	43440	43495	+	43226	78099	+	ZNF595	NM_182524	Intron_1..Intron_1
MELmiRNA_191	chr4	43440	43495	+	43276	146490	+	ZNF718	NM_001039127	Intron_1..Intron_1
MELmiRNA_194	chr4	7412936	7413013	+	7245274	7795464	+	SORCS2	NM_020777	Intron_1..Intron_1
MELmiRNA_195	chr4	9689333	9689414	-	9685060	9727671	-	WDR1	NM_005112	Intron_3..Intron_3
MELmiRNA_195	chr4	9689333	9689414	-	9685060	9727671	-	WDR1	NM_017491	Intron_3..Intron_3
MELmiRNA_197	chr4	86862641	86862714	+	86615307	87142847	+	ARHGAP24	NM_001025616	Intron_3..Intron_3
MELmiRNA_200	chr4	141292876	141292963	+	140856995	141294683	-	MAML3	NM_018717	Intron_5..Intron_5
MELmiRNA_201	chr4	144484063	144484138	+	144477432	144615167	+	GAB1	NM_002039	Intron_1..Intron_1
MELmiRNA_201	chr4	144484063	144484138	+	144477432	144615167	+	GAB1	NM_207123	Intron_1..Intron_1
MELmiRNA_203	chr4	148885921	148886001	+	148872902	149213377	+	ARHGAP10	NM_024605	Intron_1..Intron_1
MELmiRNA_204	chr4	153629928	153630019	-	153461859	153675622	-	FBXW7	NM_033632	Intron_11..Intron_11
MELmiRNA_205	chr4	153629929	153630018	-	153461859	153675622	-	FBXW7	NM_033632	Intron_11..Intron_11
MELmiRNA_206	chr4	153629931	153630017	-	153461859	153675622	-	FBXW7	NM_033632	Intron_11..Intron_11
MELmiRNA_207	chr4	153629932	153630016	-	153461859	153675622	-	FBXW7	NM_033632	Intron_11..Intron_11
MELmiRNA_209	chr4	174425886	174425959	+	174326478	174481693	+	GALNT7	NM_017423	Intron_2..Intron_2
MELmiRNA_215	chr5	31506288	31506357	-	31436358	31568039	-	RNASEN	NM_013235	Intron_19..Intron_19
MELmiRNA_215	chr5	31506288	31506357	-	31436358	31568039	-	RNASEN	NM_001100412	Intron_19..Intron_19
MELmiRNA_221	chr5	92982164	92982242	-	92979187	93473160	-	FAM172A	NM_001163417	Exon_1..Exon_1
MELmiRNA_221	chr5	92982164	92982242	-	92979187	93473160	-	FAM172A	NM_001163418	Exon_1..Exon_1
MELmiRNA_221	chr5	92982164	92982242	-	92979187	93473160	-	FAM172A	NM_032042	Exon_1..Exon_1
MELmiRNA_221	chr5	92982164	92982242	-	92979187	93473160	-	FAM172A	NR_028080	Exon_1..Exon_1
MELmiRNA_238	chr5	156588987	156589067	-	156540484	156614687	+	ITK	NM_005546	Intron_7..Intron_7
MELmiRNA_240	chr5	157218624	157218679	-	157145874	157218746	-	CLINT1	NM_014666	NA..NA
MELmiRNA_244	chr5	171764437	171764510	-	171693109	171814132	-	SH3PXD2B	NM_001017995	Intron_10..Intron_10
MELmiRNA_245	chr5	172380327	172380409	+	172343368	172394506	+	ATP6V0E1	NM_003945	Intron_3..Intron_3
MELmiRNA_250	chr6	5093473	5093548	-	5053651	5206167	-	LYRM4	NM_020408	Intron_1..Intron_1
MELmiRNA_251	chr6	6114563	6114644	+	6089309	6265923	-	F13A1	NM_000129	Intron_3..Intron_3
MELmiRNA_262	chr6	33046625	33046697	+	33044414	33057260	+	BRD2	NM_005104	Intron_1..Intron_1
MELmiRNA_266	chr6	44329921	44330000	-	44329815	44333261	-	SLC35B2	NM_178148	Exon_1..Exon_1
MELmiRNA_267	chr6	44329922	44329999	-	44329815	44333261	-	SLC35B2	NM_178148	Exon_1..Exon_1
MELmiRNA_269	chr6	57362889	57362969	+	57290380	57621335	+	PRIM2	NM_000947	Intron_7..Intron_7
MELmiRNA_270	chr6	76194845	76194908	+	76074519	76260216	-	FILIP1	NM_015687	Intron_5..Intron_5
MELmiRNA_275	chr6	118388092	118388166	-	118335381	118745532	+	SLC35F1	NM_001029858	Intron_1..Intron_1
MELmiRNA_276	chr6	118388093	118388165	+	118335381	118745532	+	SLC35F1	NM_001029858	Intron_1..Intron_1
MELmiRNA_282	chr6	138798043	138798124	-	138784873	138862272	-	NHSL1	NM_001144060	Intron_3..Intron_3
MELmiRNA_283	chr6	138798043	138798124	-	138784873	138862272	-	NHSL1	NM_001144060	Intron_3..Intron_3
MELmiRNA_287	chr6	159105691	159105764	-	158991033	159105889	+	SYTL3	NM_001009991	NA..NA
MELmiRNA_292	chr7	19711506	19711584	-	19701609	19715185	-	TWISTNB	NM_001002926	Intron_3..Intron_3
MELmiRNA_293	chr7	44116972	44117038	+	44110484	44120684	+	AEBP1	NM_001129	Intron_12..Exon_13
MELmiRNA_297	chr7	65737402	65737488	+	65731324	65745467	+	KCTD7	NM_153033	Intron_2..Intron_2
MELmiRNA_304	chr7	101893206	101893259	+	101892394	101900617	+	LRWD1	NM_152892	Intron_1..Intron_1
MELmiRNA_307	chr7	138379380	138379462	-	138378805	138445005	-	ZC3HAV1	NM_020119	Exon_1..Exon_1
MELmiRNA_308	chr7	138379386	138379452	-	138378805	138445005	-	ZC3HAV1	NM_020119	Exon_1..Exon_1
MELmiRNA_312	chr8	17583367	17583446	-	17545583	17599526	-	MTUS1	NM_020749	Intron_8..Intron_8
MELmiRNA_312	chr8	17583367	17583446	-	17545583	17624010	-	MTUS1	NM_001001931	Intron_8..Intron_8
MELmiRNA_312	chr8	17583367	17583446	-	17545583	17702706	-	MTUS1	NM_001001925	Intron_8..Intron_8
MELmiRNA_312	chr8	17583367	17583446	-	17545583	17702706	-	MTUS1	NM_001001924	Intron_8..Intron_8
MELmiRNA_314	chr8	31047173	31047247	+	31010319	31150819	+	WRN	NM_000553	Intron_7..Intron_7
MELmiRNA_315	chr8	41247732	41247811	-	41238634	41286137	-	SFRP1	NM_003012	Intron_1..Intron_1
MELmiRNA_316	chr8	41247733	41247810	-	41238634	41286137	-	SFRP1	NM_003012	Intron_1..Intron_1
MELmiRNA_318	chr8	62463395	62463476	-	62363078	62576756	+	RLBP1L1	NM_173519	Intron_3..Intron_3
MELmiRNA_321	chr8	70852565	70852622	-	70747123	70907958	-	SLCO5A1	NM_001146009	Intron_7..Intron_7
MELmiRNA_321	chr8	70852565	70852622	-	70747123	70908179	-	SLCO5A1	NM_001146008	Intron_7..Intron_7
MELmiRNA_321	chr8	70852565	70852622	-	70747123	70909853	-	SLCO5A1	NM_030958	Intron_8..Intron_8
MELmiRNA_328	chr8	100374367	100374446	+	100094669	100958984	+	VPS13B	NM_152564	Intron_19..Intron_19
MELmiRNA_328	chr8	100374367	100374446	+	100094669	100958984	+	VPS13B	NM_017890	Intron_19..Intron_19
MELmiRNA_329	chr8	104236018	104236093	+	104222096	104311709	+	BAALC	NM_024812	Intron_1..Intron_1
MELmiRNA_329	chr8	104236018	104236093	+	104222096	104311709	+	BAALC	NM_001024372	Intron_1..Intron_1
MELmiRNA_335	chr8	144720795	144720875	-	144719505	144726071	-	C8orf73	NM_001100878	Intron_1..Intron_1
MELmiRNA_336	chr8	144720796	144720874	-	144719505	144726071	-	C8orf73	NM_001100878	Intron_1..Intron_1
MELmiRNA_339	chr9	5997826	5997904	+	5909007	5998003	-	KIAA2026	NM_001017969	NA..NA
MELmiRNA_341	chr9	18563304	18563377	+	18464103	18674952	+	ADAMTSL1	NM_052866	Intron_3..Intron_3
MELmiRNA_341	chr9	18563304	18563377	+	18464103	18900947	+	ADAMTSL1	NM_001040272	Intron_3..Intron_3
MELmiRNA_344	chr9	35598084	35598162	+	35595280	35600038	+	TESK1	NM_006285	Intron_7..Exon_8
MELmiRNA_353	chr9	91116960	91117041	+	91115932	91121438	+	CKS2	NM_001827	Intron_1..Intron_1
MELmiRNA_355	chr9	96888117	96888197	-	96528814	96889262	+	C9orf3	NM_032823	Intron_14..Intron_14
MELmiRNA_361	chr9	129671513	129671597	-	129668579	129679843	-	AK1	NM_000476	Intron_2..Intron_2
MELmiRNA_362	chr9	130047047	130047130	-	130005483	130057348	+	DNM1	NM_004408	Intron_14..Intron_14
MELmiRNA_362	chr9	130047047	130047130	-	130005483	130057348	+	DNM1	NM_001005336	Intron_14..Intron_14
MELmiRNA_366	chr9	136411078	136411139	+	136358136	136472253	+	RXRA	NM_002957	Intron_1..Intron_1
MELmiRNA_370	chr9	139604389	139604471	-	139596351	139604758	-	ZMYND19	NM_138462	Intron_5..Intron_5
MELmiRNA_371	chr10	677636	677711	-	310131	725608	-	DIP2C	NM_014974	Intron_36..Intron_36
MELmiRNA_373	chr10	6234165	6234246	+	6226848	6317511	+	PFKFB3	NM_001145443	Intron_1..Intron_1
MELmiRNA_376	chr10	14070713	14070788	-	13725711	14412872	-	FRMD4A	NM_018027	Intron_23..Intron_23
MELmiRNA_377	chr10	35408535	35408611	-	35338811	35419300	-	CUL2	NM_003591	Intron_20..Intron_20
MELmiRNA_380	chr10	49991908	49991973	-	49892338	49993565	-	C10orf72	NM_001031746	Intron_7..Intron_7
MELmiRNA_380	chr10	49991908	49991973	-	49980222	49993565	-	C10orf72	NM_144984	Intron_2..Intron_2
MELmiRNA_389	chr10	103351164	103351244	+	103338078	103359400	+	RP11-529I10.4	NM_015448	Intron_4..Intron_4
MELmiRNA_390	chr10	103351164	103351244	-	103338078	103359400	+	RP11-529I10.4	NM_015448	Intron_4..Intron_4
MELmiRNA_391	chr10	103756579	103756660	-	103595345	103805922	-	C10orf76	NM_024541	Intron_13..Intron_13
MELmiRNA_392	chr10	103756580	103756659	-	103595345	103805922	-	C10orf76	NM_024541	Intron_13..Intron_13
MELmiRNA_394	chr10	112647833	112647906	+	112621585	112649754	+	PDCD4	NM_014456	NA..NA
MELmiRNA_394	chr10	112647833	112647906	+	112621585	112649754	+	PDCD4	NM_145341	NA..NA
MELmiRNA_405	chr11	8662351	8662408	+	8660570	8667995	+	RPL27A	NM_000990	Intron_3..Intron_3
MELmiRNA_405	chr11	8662351	8662408	+	8662349	8662479	+	SNORA3	NR_002580	NA..NA
MELmiRNA_409	chr11	10658784	10658861	+	10551213	10671681	-	MRVI1	NM_001100167	Intron_19..Intron_19
MELmiRNA_409	chr11	10658784	10658861	+	10551213	10672111	-	MRVI1	NM_130385	Intron_19..Intron_19
MELmiRNA_409	chr11	10658784	10658861	+	10551213	10672111	-	MRVI1	NM_001100163	Intron_19..Intron_19
MELmiRNA_414	chr11	19738126	19738205	+	19328846	20099723	+	NAV2	NM_001111018	Intron_1..Intron_1
MELmiRNA_414	chr11	19738126	19738205	+	19691456	20099723	+	NAV2	NM_182964	Intron_1..Intron_1
MELmiRNA_414	chr11	19738126	19738205	+	19691456	20099723	+	NAV2	NM_145117	Intron_1..Intron_1
MELmiRNA_415	chr11	19738127	19738204	+	19328846	20099723	+	NAV2	NM_001111018	Intron_1..Intron_1
MELmiRNA_415	chr11	19738127	19738204	+	19691456	20099723	+	NAV2	NM_182964	Intron_1..Intron_1
MELmiRNA_415	chr11	19738127	19738204	+	19691456	20099723	+	NAV2	NM_145117	Intron_1..Intron_1
MELmiRNA_417	chr11	43661988	43662039	+	43658718	43834745	+	HSD17B12	NM_016142	Intron_1..Intron_1
MELmiRNA_420	chr11	46429931	46430015	-	46374539	46569490	-	AMBRA1	NM_017749	Intron_7..Intron_7
MELmiRNA_421	chr11	46429933	46430013	+	46374539	46569490	-	AMBRA1	NM_017749	Intron_7..Intron_7
MELmiRNA_422	chr11	47157712	47157766	-	47155656	47164534	-	PACSIN3	NM_016223	Exon_5..Intron_5
MELmiRNA_423	chr11	48074910	48074986	+	47958685	48148970	+	PTPRJ	NM_002843	Intron_1..Intron_1
MELmiRNA_423	chr11	48074910	48074986	+	47958685	48110842	+	PTPRJ	NM_001098503	Intron_1..Intron_1
MELmiRNA_427	chr11	59119126	59119207	-	59098446	59140193	-	OSBP	NM_002556	Intron_7..Intron_7
MELmiRNA_428	chr11	59119128	59119205	-	59098446	59140193	-	OSBP	NM_002556	Intron_7..Intron_7
MELmiRNA_433	chr11	66458481	66458553	-	66372572	66482423	-	PC	NM_001040716	Intron_20..Intron_20
MELmiRNA_433	chr11	66458481	66458553	-	66372572	66482423	-	PC	NM_000920	Intron_20..Intron_20
MELmiRNA_434	chr11	68607220	68607302	+	68572925	68614648	+	TPCN2	NM_139075	Intron_18..Intron_18
MELmiRNA_435	chr11	71460922	71460996	-	71391558	71469221	-	NUMA1	NM_006185	Intron_26..Intron_26
MELmiRNA_443	chr11	95714250	95714338	+	95351087	95715992	-	MAML2	NM_032427	NA..NA
MELmiRNA_444	chr11	100346804	100346883	+	100063616	100366866	+	FLJ32810	NM_152432	Intron_17..Intron_17
MELmiRNA_449	chr11	126363564	126363648	-	125798606	126375976	-	KIRREL3	NM_032531	Intron_16..Intron_16
MELmiRNA_449	chr11	126363564	126363648	-	125806046	126375976	-	KIRREL3	NM_001161707	Intron_13..Intron_13
MELmiRNA_457	chr12	52911448	52911527	-	52910996	52960182	-	CBX5	NM_012117	Exon_1..Exon_1
MELmiRNA_457	chr12	52911448	52911527	-	52910996	52939596	-	CBX5	NM_001127322	Exon_1..Exon_1
MELmiRNA_457	chr12	52911448	52911527	-	52910996	52939637	-	CBX5	NM_001127321	Exon_1..Exon_1
MELmiRNA_461	chr12	97959174	97959237	+	97653201	98072603	-	ANKS1B	NM_020140	Intron_8..Intron_8
MELmiRNA_461	chr12	97959174	97959237	+	97653201	98902563	-	ANKS1B	NM_152788	Intron_9..Intron_9
MELmiRNA_461	chr12	97959174	97959237	+	97662124	98072603	-	ANKS1B	NM_181670	Intron_10..Intron_10
MELmiRNA_462	chr12	103509541	103509624	+	103374907	103676013	+	CHST11	NM_018413	Intron_2..Intron_2
MELmiRNA_474	chr13	75251256	75251342	+	75232797	75332005	+	LMO7	NM_015842	Intron_1..Intron_1
MELmiRNA_474	chr13	75251256	75251342	+	75092570	75332005	+	LMO7	NM_005358	Intron_5..Intron_5
MELmiRNA_477	chr13	97658779	97658855	+	97593434	97695559	+	FARP1	NM_001001715	Intron_1..Intron_1
MELmiRNA_477	chr13	97658779	97658855	+	97593434	97900024	+	FARP1	NM_005766	Intron_1..Intron_1
MELmiRNA_481	chr14	22412287	22412368	+	22410799	22417131	+	LRP10	NM_014045	Intron_2..Exon_3
MELmiRNA_486	chr14	32024052	32024130	+	31868229	32372019	+	AKAP6	NM_004274	Intron_2..Intron_2
MELmiRNA_490	chr14	64581159	64581240	+	64523259	64599123	+	FNTB	NM_002028	Intron_9..Intron_9
MELmiRNA_490	chr14	64581159	64581240	+	64542644	64638980	-	MAX	NM_197957	Intron_1..Intron_1
MELmiRNA_493	chr14	94674009	94674076	-	94622317	94677808	-	DICER1	NM_030621	Intron_26..Intron_26
MELmiRNA_493	chr14	94674009	94674076	-	94622317	94693512	-	DICER1	NM_177438	Intron_26..Intron_26
MELmiRNA_498	chr14	101500626	101500703	+	101500617	101586888	+	DYNC1H1	NM_001376	Exon_1..Exon_1
MELmiRNA_504	chr15	33451765	33451843	-	33450461	33625696	-	ATPBD4	NM_080650	Intron_1..Intron_1
MELmiRNA_507	chr15	40485208	40485283	+	40427592	40491807	+	CAPN3	NR_027911	Intron_17..Intron_17
MELmiRNA_507	chr15	40485208	40485283	+	40484268	40491807	+	CAPN3	NM_173089	Intron_1..Intron_1
MELmiRNA_507	chr15	40485208	40485283	+	40427592	40491807	+	CAPN3	NM_212465	Intron_18..Intron_18
MELmiRNA_507	chr15	40485208	40485283	+	40438989	40491807	+	CAPN3	NM_024344	Intron_14..Intron_14
MELmiRNA_507	chr15	40485208	40485283	+	40438989	40491807	+	CAPN3	NM_000070	Intron_14..Intron_14
MELmiRNA_507	chr15	40485208	40485283	+	40481879	40491807	+	CAPN3	NM_173088	Intron_3..Intron_3
MELmiRNA_507	chr15	40485208	40485283	+	40438989	40491807	+	CAPN3	NM_173087	Intron_13..Intron_13
MELmiRNA_507	chr15	40485208	40485283	+	40427592	40491807	+	CAPN3	NR_027912	Intron_19..Intron_19
MELmiRNA_507	chr15	40485208	40485283	+	40484268	40491807	+	CAPN3	NM_173090	Intron_1..Intron_1
MELmiRNA_512	chr15	73930568	73930623	-	73922676	73980443	+	UBE2Q2	NM_173469	Intron_1..Intron_1
MELmiRNA_512	chr15	73930568	73930623	-	73923439	73980443	+	UBE2Q2	NM_001145335	Intron_1..Intron_1
MELmiRNA_516	chr15	88228178	88228255	-	88174834	88238621	-	AP3S2	NM_005829	Intron_3..Intron_3
MELmiRNA_516	chr15	88228178	88228255	-	88174834	88238621	-	AP3S2	NR_023361	Intron_4..Intron_4
MELmiRNA_517	chr15	88350991	88351077	+	88345755	88425029	+	ZNF710	NM_198526	Intron_1..Intron_1
MELmiRNA_520	chr15	91248633	91248709	+	91244554	91293467	+	CHD2	NM_001042572	Intron_2..Intron_2
MELmiRNA_520	chr15	91248633	91248709	+	91244554	91372241	+	CHD2	NM_001271	Intron_2..Intron_2
MELmiRNA_521	chr16	533278	533367	+	517856	544637	+	SOLH	NM_005632	Intron_3..Intron_3
MELmiRNA_522	chr16	1079767	1079843	+	1078226	1086245	-	C1QTNF8	NM_207419	Exon_1..Exon_1
MELmiRNA_523	chr16	1724987	1725068	+	1696221	1760319	+	MAPK8IP3	NM_015133	Intron_4..Intron_4
MELmiRNA_523	chr16	1724987	1725068	+	1696221	1760319	+	MAPK8IP3	NM_001040439	Intron_4..Intron_4
MELmiRNA_546	chr16	24121956	24122041	+	23754800	24139431	+	PRKCB	NM_002738	Intron_16..Intron_16
MELmiRNA_546	chr16	24121956	24122041	+	23754800	24139431	+	PRKCB	NM_212535	Intron_16..Intron_16
MELmiRNA_547	chr16	25944059	25944132	+	25610847	26056510	+	HS3ST4	NM_006040	Intron_1..Intron_1
MELmiRNA_550	chr16	31280808	31280876	-	31274009	31301819	+	ITGAX	NM_000887	Intron_10..Intron_10
MELmiRNA_553	chr16	47132643	47132702	-	47130137	47201621	-	N4BP1	NM_153029	Exon_1..Exon_1
MELmiRNA_555	chr16	49333717	49333789	+	49333529	49393347	+	CYLD	NM_001042412	Intron_1..Intron_1
MELmiRNA_555	chr16	49333717	49333789	+	49333461	49393347	+	CYLD	NM_001042355	Intron_1..Intron_1
MELmiRNA_555	chr16	49333717	49333789	+	49333461	49393347	+	CYLD	NM_015247	Intron_1..Intron_1
MELmiRNA_558	chr16	66945469	66945530	+	66902445	66948663	+	PRMT7	NM_019023	Intron_16..Intron_16
MELmiRNA_559	chr16	67565304	67565366	+	67435009	67676586	+	TMCO7	NM_024562	Intron_14..Intron_14
MELmiRNA_560	chr16	69253109	69253185	+	69252607	69277455	-	MTSS1L	NM_138383	Exon_1..Exon_1
MELmiRNA_563	chr16	70655482	70655560	-	70654625	70668646	+	HPR	NM_020995	Intron_1..Intron_1
MELmiRNA_564	chr16	70655483	70655559	-	70654625	70668646	+	HPR	NM_020995	Intron_1..Intron_1
MELmiRNA_566	chr16	82099452	82099514	+	81218078	82387700	+	CDH13	NM_001257	Intron_7..Intron_7
MELmiRNA_572	chr17	872466	872549	-	853508	959074	-	ABR	NM_001092	Intron_7..Intron_7
MELmiRNA_572	chr17	872466	872549	-	853508	1029881	-	ABR	NM_021962	Intron_7..Intron_7
MELmiRNA_572	chr17	872466	872549	-	853509	1037366	-	ABR	NM_001159746	Intron_7..Intron_7
MELmiRNA_573	chr17	872469	872546	-	853508	959074	-	ABR	NM_001092	Intron_7..Intron_7
MELmiRNA_573	chr17	872469	872546	-	853508	1029881	-	ABR	NM_021962	Intron_7..Intron_7
MELmiRNA_573	chr17	872469	872546	-	853509	1037366	-	ABR	NM_001159746	Intron_7..Intron_7
MELmiRNA_574	chr17	1499109	1499195	+	1496194	1500142	-	RILP	NM_031430	Intron_5..Intron_5
MELmiRNA_589	chr17	23711803	23711886	+	23708813	23713216	+	TMEM199	NM_152464	Intron_4..Exon_5
MELmiRNA_590	chr17	25468230	25468304	-	25467959	25537612	+	CCDC55	NM_032141	Intron_1..Intron_1
MELmiRNA_593	chr17	37314324	37314395	-	37276704	37328798	-	ACLY	NM_001096	Intron_19..Intron_19
MELmiRNA_593	chr17	37314324	37314395	-	37276704	37328798	-	ACLY	NM_198830	Intron_18..Intron_18
MELmiRNA_594	chr17	39626373	39626449	-	39624698	39631055	-	ATXN7L3	NM_020218	Exon_1..Exon_1
MELmiRNA_594	chr17	39626373	39626449	-	39624698	39631055	-	ATXN7L3	NM_001098833	Exon_1..Exon_1
MELmiRNA_595	chr17	39626374	39626448	-	39624698	39631055	-	ATXN7L3	NM_020218	Exon_1..Exon_1
MELmiRNA_595	chr17	39626374	39626448	-	39624698	39631055	-	ATXN7L3	NM_001098833	Exon_1..Exon_1
MELmiRNA_596	chr17	44156769	44156836	-	44155540	44157118	+	C17orf93	NR_024103	NA..NA
MELmiRNA_599	chr17	63252531	63252604	-	63252241	63410956	+	BPTF	NM_182641	Exon_1..Exon_1
MELmiRNA_599	chr17	63252531	63252604	-	63252241	63410956	+	BPTF	NM_004459	Exon_1..Exon_1
MELmiRNA_602	chr17	72597096	72597172	+	72596983	72597170	+	SCARNA16	NR_003013	NA..NA
MELmiRNA_602	chr17	72597096	72597172	+	72596319	72602662	+	C17orf86	NR_027058	Intron_2..Intron_2
MELmiRNA_603	chr17	76714272	76714350	+	76705690	76754467	-	AATK	NM_001080395	Intron_7..Intron_7
MELmiRNA_604	chr17	76714276	76714346	+	76705690	76754467	-	AATK	NM_001080395	Intron_7..Intron_7
MELmiRNA_605	chr17	77032725	77032809	-	76988134	77047953	+	BAHCC1	NM_001080519	Intron_10..Intron_10
MELmiRNA_612	chr18	14761250	14761324	+	14738238	14842737	+	ANKRD30B	NM_001145029	Intron_8..Intron_8
MELmiRNA_613	chr18	14820165	14820241	+	14738238	14842737	+	ANKRD30B	NM_001145029	Intron_27..Intron_27
MELmiRNA_615	chr18	18767310	18767399	+	18767292	18860447	+	RBBP8	NM_002894	Exon_1..Exon_1
MELmiRNA_616	chr18	18767311	18767398	+	18767292	18860447	+	RBBP8	NM_002894	Exon_1..Exon_1
MELmiRNA_618	chr18	54055907	54055996	+	53862616	54219752	+	NEDD4L	NM_015277	Intron_2..Intron_2
MELmiRNA_618	chr18	54055907	54055996	+	54013634	54219752	+	NEDD4L	NM_001144970	Intron_1..Intron_1
MELmiRNA_618	chr18	54055907	54055996	+	53862616	54219752	+	NEDD4L	NM_001144967	Intron_2..Intron_2
MELmiRNA_618	chr18	54055907	54055996	+	53865455	54219752	+	NEDD4L	NM_001144964	Intron_2..Intron_2
MELmiRNA_618	chr18	54055907	54055996	+	54039746	54219752	+	NEDD4L	NM_001144966	Intron_1..Intron_1
MELmiRNA_618	chr18	54055907	54055996	+	53967562	54219752	+	NEDD4L	NM_001144968	Intron_2..Intron_2
MELmiRNA_618	chr18	54055907	54055996	+	53967562	54219752	+	NEDD4L	NM_001144969	Intron_2..Intron_2
MELmiRNA_618	chr18	54055907	54055996	+	53967562	54219752	+	NEDD4L	NM_001144965	Intron_2..Intron_2
MELmiRNA_618	chr18	54055907	54055996	+	53967562	54219752	+	NEDD4L	NM_001144971	Intron_3..Intron_3
MELmiRNA_619	chr18	54055910	54055993	+	53862616	54219752	+	NEDD4L	NM_015277	Intron_2..Intron_2
MELmiRNA_619	chr18	54055910	54055993	+	54013634	54219752	+	NEDD4L	NM_001144970	Intron_1..Intron_1
MELmiRNA_619	chr18	54055910	54055993	+	53862616	54219752	+	NEDD4L	NM_001144967	Intron_2..Intron_2
MELmiRNA_619	chr18	54055910	54055993	+	53865455	54219752	+	NEDD4L	NM_001144964	Intron_2..Intron_2
MELmiRNA_619	chr18	54055910	54055993	+	54039746	54219752	+	NEDD4L	NM_001144966	Intron_1..Intron_1
MELmiRNA_619	chr18	54055910	54055993	+	53967562	54219752	+	NEDD4L	NM_001144968	Intron_2..Intron_2
MELmiRNA_619	chr18	54055910	54055993	+	53967562	54219752	+	NEDD4L	NM_001144969	Intron_2..Intron_2
MELmiRNA_619	chr18	54055910	54055993	+	53967562	54219752	+	NEDD4L	NM_001144965	Intron_2..Intron_2
MELmiRNA_619	chr18	54055910	54055993	+	53967562	54219752	+	NEDD4L	NM_001144971	Intron_3..Intron_3
MELmiRNA_624	chr19	764584	764653	+	763517	772952	-	PRG2	NM_024888	Exon_1..Exon_1
MELmiRNA_626	chr19	3311215	3311280	+	3310615	3414603	+	NFIC	NM_205843	Intron_1..Intron_1
MELmiRNA_627	chr19	6367436	6367507	-	6364118	6375822	-	KHSRP	NM_003685	Intron_6..Exon_7
MELmiRNA_632	chr19	18358372	18358444	+	18357967	18360986	+	GDF15	NM_004864	Intron_1..Intron_1
MELmiRNA_644	chr19	51904390	51904442	-	51869412	51909417	-	PRKD2	NM_001079882	Intron_15..Intron_15
MELmiRNA_644	chr19	51904390	51904442	-	51869412	51912224	-	PRKD2	NM_016457	Intron_15..Intron_15
MELmiRNA_644	chr19	51904390	51904442	-	51869412	51912224	-	PRKD2	NM_001079880	Intron_15..Intron_15
MELmiRNA_644	chr19	51904390	51904442	-	51869412	51912224	-	PRKD2	NM_001079881	Intron_15..Intron_15
MELmiRNA_645	chr19	52422037	52422120	+	52415918	52426291	-	BBC3	NM_014417	Intron_2..Intron_2
MELmiRNA_645	chr19	52422037	52422120	+	52415920	52427863	-	BBC3	NM_001127242	Intron_1..Intron_1
MELmiRNA_645	chr19	52422037	52422120	+	52415920	52427863	-	BBC3	NM_001127241	Intron_2..Intron_2
MELmiRNA_645	chr19	52422037	52422120	+	52415920	52427863	-	BBC3	NM_001127240	Intron_2..Intron_2
MELmiRNA_646	chr19	52422039	52422118	+	52415918	52426291	-	BBC3	NM_014417	Intron_2..Intron_2
MELmiRNA_646	chr19	52422039	52422118	+	52415920	52427863	-	BBC3	NM_001127242	Intron_1..Intron_1
MELmiRNA_646	chr19	52422039	52422118	+	52415920	52427863	-	BBC3	NM_001127241	Intron_2..Intron_2
MELmiRNA_646	chr19	52422039	52422118	+	52415920	52427863	-	BBC3	NM_001127240	Intron_2..Intron_2
MELmiRNA_647	chr19	52422041	52422116	-	52415918	52426291	-	BBC3	NM_014417	Intron_2..Intron_2
MELmiRNA_647	chr19	52422041	52422116	-	52415920	52427863	-	BBC3	NM_001127242	Intron_1..Intron_1
MELmiRNA_647	chr19	52422041	52422116	-	52415920	52427863	-	BBC3	NM_001127241	Intron_2..Intron_2
MELmiRNA_647	chr19	52422041	52422116	-	52415920	52427863	-	BBC3	NM_001127240	Intron_2..Intron_2
MELmiRNA_651	chr19	54160385	54160456	+	54160377	54161948	+	FTL	NM_000146	Exon_1..Exon_1
MELmiRNA_652	chr19	55083240	55083306	+	55072640	55083813	+	TBC1D17	NM_024682	Intron_15..Exon_16
MELmiRNA_654	chr19	59177600	59177678	+	59158105	59177951	+	CACNG8	NM_031895	NA..NA
MELmiRNA_655	chr19	60894747	60894812	+	60878372	60898945	+	EPN1	NM_013333	Intron_5..Intron_5
MELmiRNA_655	chr19	60894747	60894812	+	60878372	60898945	+	EPN1	NM_001130072	Intron_6..Intron_6
MELmiRNA_655	chr19	60894747	60894812	+	60879802	60898945	+	EPN1	NM_001130071	Intron_6..Intron_6
MELmiRNA_657	chr20	18399259	18399335	+	18396032	18413286	+	POLR3F	NM_006466	Intron_2..Intron_2
MELmiRNA_658	chr20	23379831	23379912	+	23379040	23381482	-	CST11	NM_080830	Intron_1..Intron_1
MELmiRNA_658	chr20	23379831	23379912	+	23379040	23381482	-	CST11	NM_130794	Intron_1..Intron_1
MELmiRNA_660	chr20	32100582	32100661	+	32045392	32131728	+	RALY	NM_007367	Intron_2..Intron_2
MELmiRNA_660	chr20	32100582	32100661	+	32045392	32131728	+	RALY	NM_016732	Intron_2..Intron_2
MELmiRNA_664	chr20	49502849	49502921	-	49441171	49592665	-	NFATC2	NM_012340	Intron_5..Intron_5
MELmiRNA_664	chr20	49502849	49502921	-	49441171	49592665	-	NFATC2	NM_173091	Intron_4..Intron_4
MELmiRNA_664	chr20	49502849	49502921	-	49441172	49612575	-	NFATC2	NM_001136021	Intron_5..Intron_5
MELmiRNA_668	chr20	60073253	60073336	+	59983248	60074261	-	TAF4	NM_003185	NA..NA
MELmiRNA_669	chr20	61340576	61340639	+	61337720	61342299	+	BIRC7	NM_022161	Intron_4..Intron_4
MELmiRNA_669	chr20	61340576	61340639	+	61337720	61342299	+	BIRC7	NM_139317	Intron_4..Intron_4
MELmiRNA_677	chr21	46406675	46406727	+	46405490	46428801	-	C21orf56	NM_001142854	Intron_2..Intron_2
MELmiRNA_677	chr21	46406675	46406727	+	46405490	46428801	-	C21orf56	NM_032261	Intron_2..Intron_2
MELmiRNA_679	chr22	16626946	16627025	-	16596905	16636779	-	BID	NM_197966	Intron_5..Intron_5
MELmiRNA_679	chr22	16626946	16627025	-	16596905	16637258	-	BID	NM_001196	Intron_5..Intron_5
MELmiRNA_679	chr22	16626946	16627025	-	16596905	16637258	-	BID	NM_197967	Intron_4..Intron_4
MELmiRNA_680	chr22	19221619	19221704	+	19191885	19271919	+	MED15	NM_015889	Intron_2..Intron_2
MELmiRNA_680	chr22	19221619	19221704	+	19191885	19271919	+	MED15	NM_001003891	Intron_2..Intron_2
MELmiRNA_681	chr22	26646513	26646600	-	26645363	26650950	+	LOC284900	NR_026962	Intron_1..Intron_1
MELmiRNA_681	chr22	26646513	26646600	-	26645363	26728665	+	LOC284900	NR_026963	Intron_1..Intron_1
MELmiRNA_682	chr22	26646514	26646599	+	26645363	26650950	+	LOC284900	NR_026962	Intron_1..Intron_1
MELmiRNA_682	chr22	26646514	26646599	+	26645363	26728665	+	LOC284900	NR_026963	Intron_1..Intron_1
MELmiRNA_683	chr22	29457544	29457628	+	29420792	29633811	+	OSBP2	NM_030758	Intron_1..Intron_1
MELmiRNA_687	chr22	39161290	39161366	-	39136237	39362636	-	MKL1	NM_020831	Intron_10..Intron_10
MELmiRNA_688	chr22	39623015	39623080	-	39583039	39653826	+	XPNPEP3	NM_022098	Intron_4..Intron_4
MELmiRNA_693	chr22	44865594	44865663	+	44860540	44888470	+	LOC400931	NR_027033	Intron_1..Intron_1
MELmiRNA_694	chr22	44888110	44888201	+	44860540	44888470	+	LOC400931	NR_027033	NA..NA
MELmiRNA_702	chrX	15420093	15420153	-	15312844	15421385	-	PIR	NM_003662	Intron_9..Intron_9
MELmiRNA_702	chrX	15420093	15420153	-	15312844	15421385	-	PIR	NM_001018109	Intron_9..Intron_9
MELmiRNA_709	chrX	53244788	53244873	-	53237228	53271329	-	KDM5C	NM_001146702	Exon_11..Intron_11
MELmiRNA_709	chrX	53244788	53244873	-	53237228	53271329	-	KDM5C	NM_004187	Exon_11..Intron_11
MELmiRNA_715	chrX	152899738	152899826	+	152891184	152901840	+	TMEM187	NM_003492	Intron_1..Intron_1
MELmiRNA_716	chrX	152899742	152899822	+	152891184	152901840	+	TMEM187	NM_003492	Intron_1..Intron_1
MELmiRNA_717	chrX	152899743	152899821	-	152891184	152901840	+	TMEM187	NM_003492	Intron_1..Intron_1
MELmiRNA_718	chrX	152899744	152899820	+	152891184	152901840	+	TMEM187	NM_003492	Intron_1..Intron_1
MELmiRNA_719	chrX	152899744	152899820	-	152891184	152901840	+	TMEM187	NM_003492	Intron_1..Intron_1
MELmiRNA_721	chrX	153650065	153650123	+	153644224	153659157	+	DKC1	NM_001142463	Intron_8..Intron_8
MELmiRNA_721	chrX	153650065	153650123	+	153644224	153659157	+	DKC1	NM_001363	Intron_8..Intron_8
MELmiRNA_721	chrX	153650065	153650123	+	153649996	153650126	+	SNORA36A	NR_002969	NA..NA
