# Supplementary material for: Characterization of the Melanoma miRNAome by Deep Sequencing
Source: PLoS One. 2010 Mar 12;5(3):e9685. doi: 10.1371/journal.pone.0009685 (PMC2837346; doi:10.1371/journal.pone.0009685)
Supplement: Table S10 — Known miRNAs mapped to the genome. (0.20 MB XLS) [file pone.0009685.s010.xls]

## Sheet: miRNAs expressed in Melanoma
miRNA name	Chr	ProbeStart	ProbeEnd	ChrStrand	GeneStart	GeneEnd	GeneStrand	GeneName	AccnNo	Map-on-gene
hsa-mir-766	chrX	118664729	118664839	-	118633715	118711361	-	2006-09-01	NM_145802	Intron_5..Intron_5
hsa-mir-766	chrX	118664729	118664839	-	118633715	118711361	-	2006-09-01	NM_145800	Intron_6..Intron_6
hsa-mir-766	chrX	118664729	118664839	-	118634936	118711361	-	2006-09-01	NM_145799	Intron_6..Intron_6
hsa-mir-766	chrX	118664729	118664839	-	118634936	118711361	-	2006-09-01	NM_015129	Intron_5..Intron_5
hsa-mir-1250	chr17	76721591	76721703	-	76705690	76754467	-	AATK	NM_001080395	Intron_12..Intron_12
hsa-mir-338	chr17	76714278	76714344	-	76705690	76754467	-	AATK	NM_001080395	Intron_7..Intron_7
hsa-mir-877	chr6	30660088	30660173	+	30647148	30667288	+	ABCF1	NM_001025091	Intron_13..Exon_14
hsa-mir-877	chr6	30660088	30660173	+	30647148	30667288	+	ABCF1	NM_001090	Intron_12..Exon_13
hsa-mir-320c-1	chr18	17517469	17517556	+	17484855	17538764	-	ABHD3	NM_138340	Intron_5..Intron_5
hsa-mir-95	chr4	8057928	8058008	-	8017936	8211459	-	ABLIM2	NM_001130083	Intron_5..Intron_5
hsa-mir-95	chr4	8057928	8058008	-	8017936	8211459	-	ABLIM2	NM_001130086	Intron_5..Intron_5
hsa-mir-95	chr4	8057928	8058008	-	8017936	8211459	-	ABLIM2	NM_001130084	Intron_5..Intron_5
hsa-mir-95	chr4	8057928	8058008	-	8017936	8211459	-	ABLIM2	NM_001130085	Intron_3..Intron_3
hsa-mir-95	chr4	8057928	8058008	-	8017936	8211459	-	ABLIM2	NM_032432	Intron_3..Intron_3
hsa-mir-95	chr4	8057928	8058008	-	8017936	8211459	-	ABLIM2	NM_001130087	Intron_3..Intron_3
hsa-mir-324	chr17	7067340	7067422	-	7063876	7069309	+	ACADVL	NM_000018	Intron_11..Intron_11
hsa-mir-324	chr17	7067340	7067422	-	7063876	7069309	+	ACADVL	NM_001033859	Intron_10..Intron_10
hsa-mir-641	chr19	45480290	45480388	-	45428063	45483105	-	AKT2	NM_001626	Intron_13..Intron_13
hsa-mir-486	chr8	41637116	41637183	-	41629901	41641961	-	ANK1	NM_020480	Intron_1..Intron_1
hsa-mir-486	chr8	41637116	41637183	-	41629901	41641961	-	ANK1	NM_020478	Intron_1..Intron_1
hsa-mir-486	chr8	41637116	41637183	-	41629901	41641961	-	ANK1	NM_001142445	Intron_1..Intron_1
hsa-mir-486	chr8	41637116	41637183	-	41629900	41774297	-	ANK1	NM_020475	Intron_1..Intron_1
hsa-mir-486	chr8	41637116	41637183	-	41629900	41774297	-	ANK1	NM_020476	Intron_1..Intron_1
hsa-mir-486	chr8	41637116	41637183	-	41629900	41774297	-	ANK1	NM_020477	Intron_1..Intron_1
hsa-mir-486	chr8	41637116	41637183	-	41629900	41774297	-	ANK1	NM_000037	Intron_1..Intron_1
hsa-mir-486	chr8	41637116	41637183	-	41629901	41873437	-	ANK1	NM_001142446	Intron_1..Intron_1
hsa-mir-765	chr1	155172547	155172660	-	155171255	155281786	-	ARHGEF11	NM_014784	Intron_1..Intron_1
hsa-mir-765	chr1	155172547	155172660	-	155171255	155281786	-	ARHGEF11	NM_198236	Intron_1..Intron_1
hsa-mir-1271	chr5	175727555	175727640	+	175725107	175733109	+	ARL10	NM_173664	Intron_2..Intron_2
hsa-mir-128-2	chr3	35760972	35761055	+	35658852	35810992	+	ARPP-21	NM_016300	Intron_18..Intron_18
hsa-mir-326	chr11	74723784	74723878	-	74654129	74740521	-	ARRB1	NM_004041	Intron_15..Intron_15
hsa-mir-326	chr11	74723784	74723878	-	74654129	74740521	-	ARRB1	NM_020251	Intron_14..Intron_14
hsa-mir-548d-1	chr8	124429455	124429551	-	124401271	124477886	-	ATAD2	NM_014109	Intron_13..Intron_13
hsa-mir-933	chr2	175740607	175740683	-	175647251	175741143	-	ATF2	NM_001880	Intron_13..Intron_13
hsa-mir-885	chr3	10411173	10411246	-	10340706	10522268	-	ATP2B2	NM_001683	Intron_15..Intron_15
hsa-mir-885	chr3	10411173	10411246	-	10340706	10522268	-	ATP2B2	NM_001001331	Intron_18..Intron_18
hsa-mir-1180	chr17	19188412	19188480	-	19187075	19206639	-	B9D1	NM_015681	Intron_2..Intron_2
hsa-mir-1291	chr12	47334494	47334580	-	47333261	47362302	-	C12orf41	NM_017822	Intron_1..Intron_1
hsa-mir-22	chr17	1563947	1564031	-	1561552	1566254	-	C17orf91	NM_032895	Exon_2..Exon_2
hsa-mir-22	chr17	1563947	1564031	-	1561552	1566255	-	C17orf91	NM_001001870	Exon_2..Exon_2
hsa-mir-133a-2	chr20	60572564	60572665	+	60558104	60578416	+	C20orf166	NM_178463	Intron_2..Exon_3
hsa-mir-1-1	chr20	60561958	60562028	+	60558104	60578416	+	C20orf166	NM_178463	Intron_2..Intron_2
hsa-mir-1259	chr20	47330254	47330364	+	47328583	47339197	+	C20orf199	NR_003604	Intron_2..Intron_2
hsa-mir-1259	chr20	47330254	47330364	+	47328448	47339202	+	C20orf199	NR_003606	Intron_2..Intron_2
hsa-mir-1259	chr20	47330254	47330364	+	47328121	47339202	+	C20orf199	NR_003605	Intron_2..Intron_2
hsa-mir-99a	chr21	16833280	16833360	+	16488569	16903965	+	C21orf34	NR_027791	Intron_5..Intron_5
hsa-mir-99a	chr21	16833280	16833360	+	16364712	16903965	+	C21orf34	NR_027790	Intron_6..Intron_6
hsa-let-7c	chr21	16834019	16834102	+	16488569	16903965	+	C21orf34	NR_027791	Intron_5..Intron_5
hsa-let-7c	chr21	16834019	16834102	+	16364712	16903965	+	C21orf34	NR_027790	Intron_6..Intron_6
hsa-mir-125b-2	chr21	16884428	16884516	+	16488569	16903965	+	C21orf34	NR_027791	Intron_5..Intron_5
hsa-mir-125b-2	chr21	16884428	16884516	+	16364712	16903965	+	C21orf34	NR_027790	Intron_6..Intron_6
hsa-mir-185	chr22	18400662	18400743	+	18388630	18433447	+	C22orf25	NM_152906	Intron_1..Intron_1
hsa-mir-1249	chr22	43975499	43975564	-	43966786	43987011	-	C22orf9	NM_015264	Intron_3..Intron_3
hsa-mir-1249	chr22	43975499	43975564	-	43966786	44015314	-	C22orf9	NM_001009880	Intron_3..Intron_3
hsa-mir-339	chr7	1029095	1029188	-	1003148	1144419	-	C7orf50	NM_032350	Intron_3..Intron_3
hsa-mir-339	chr7	1029095	1029188	-	1003148	1144419	-	C7orf50	NM_001134396	Intron_3..Intron_3
hsa-mir-339	chr7	1029095	1029188	-	1003148	1144419	-	C7orf50	NM_001134395	Intron_3..Intron_3
hsa-mir-23b	chr9	96887311	96887407	+	96528814	96889262	+	C9orf3	NM_032823	Intron_14..Intron_14
hsa-mir-27b	chr9	96887548	96887644	+	96528814	96889262	+	C9orf3	NM_032823	Intron_14..Intron_14
hsa-mir-24-1	chr9	96888124	96888191	+	96528814	96889262	+	C9orf3	NM_032823	Intron_14..Intron_14
hsa-mir-32	chr9	110848330	110848399	-	110817235	110922046	-	C9orf5	NM_001099734	Intron_4..Intron_4
hsa-mir-32	chr9	110848330	110848399	-	110817235	110922046	-	C9orf5	NM_032012	Intron_4..Intron_4
hsa-mir-935	chr19	59177373	59177463	+	59158105	59177951	+	CACNG8	NM_031895	NA..NA
hsa-mir-1254	chr10	70189081	70189177	+	70150976	70221315	+	CCAR1	NM_018237	Intron_15..Intron_15
hsa-mir-423	chr17	25468223	25468316	+	25467959	25537612	+	CCDC55	NM_032141	Intron_1..Intron_1
hsa-mir-628	chr15	53452430	53452524	-	53434729	53487834	-	CCPG1	NM_004748	Intron_3..Intron_3
hsa-mir-628	chr15	53452430	53452524	-	53434729	53487866	-	CCPG1	NM_020739	Intron_3..Intron_3
hsa-mir-449a	chr5	54502117	54502207	-	54444579	54504760	-	CDC20B	NM_152623	Intron_10..Intron_10
hsa-mir-449a	chr5	54502117	54502207	-	54444579	54504760	-	CDC20B	NM_001145734	Intron_9..Intron_9
hsa-mir-449b	chr5	54502231	54502327	-	54444579	54504760	-	CDC20B	NM_152623	Intron_10..Intron_10
hsa-mir-449b	chr5	54502231	54502327	-	54444579	54504760	-	CDC20B	NM_001145734	Intron_9..Intron_9
hsa-mir-1278	chr1	191372256	191372336	+	191357710	191490563	+	CDC73	NM_024529	Intron_5..Intron_5
hsa-mir-361	chrX	85045297	85045368	-	85002840	85189222	-	CHM	NM_000390	Intron_6..Intron_6
hsa-mir-671	chr7	150566440	150566557	+	150560517	150566838	+	CHPF2	NM_019015	NA..NA
hsa-mir-490	chr7	136238454	136238581	+	136203938	136352311	+	CHRM2	NM_001006627	Intron_2..Intron_2
hsa-mir-490	chr7	136238454	136238581	+	136203938	136352311	+	CHRM2	NM_001006630	Intron_2..Intron_2
hsa-mir-490	chr7	136238454	136238581	+	136204371	136352311	+	CHRM2	NM_001006632	Intron_2..Intron_2
hsa-mir-490	chr7	136238454	136238581	+	136204371	136352311	+	CHRM2	NM_000739	Intron_2..Intron_2
hsa-mir-490	chr7	136238454	136238581	+	136204371	136352311	+	CHRM2	NM_001006631	Intron_2..Intron_2
hsa-mir-490	chr7	136238454	136238581	+	136204408	136352311	+	CHRM2	NM_001006626	Intron_2..Intron_2
hsa-mir-490	chr7	136238454	136238581	+	136204523	136352311	+	CHRM2	NM_001006629	Intron_1..Intron_1
hsa-mir-490	chr7	136238454	136238581	+	136204532	136352311	+	CHRM2	NM_001006628	Intron_1..Intron_1
hsa-mir-500	chrX	49659779	49659862	+	49573964	49750632	+	CLCN5	NM_001127899	Intron_3..Intron_3
hsa-mir-500	chrX	49659779	49659862	+	49573964	49750632	+	CLCN5	NM_001127898	Intron_3..Intron_3
hsa-mir-660	chrX	49664589	49664685	+	49573964	49750632	+	CLCN5	NM_001127899	Intron_3..Intron_3
hsa-mir-660	chrX	49664589	49664685	+	49573964	49750632	+	CLCN5	NM_001127898	Intron_3..Intron_3
hsa-mir-532	chrX	49654494	49654584	+	49573964	49750632	+	CLCN5	NM_001127899	Intron_3..Intron_3
hsa-mir-532	chrX	49654494	49654584	+	49573964	49750632	+	CLCN5	NM_001127898	Intron_3..Intron_3
hsa-mir-188	chrX	49654849	49654934	+	49573964	49750632	+	CLCN5	NM_001127899	Intron_3..Intron_3
hsa-mir-188	chrX	49654849	49654934	+	49573964	49750632	+	CLCN5	NM_001127898	Intron_3..Intron_3
hsa-mir-362	chrX	49660312	49660376	+	49573964	49750632	+	CLCN5	NM_001127899	Intron_3..Intron_3
hsa-mir-362	chrX	49660312	49660376	+	49573964	49750632	+	CLCN5	NM_001127898	Intron_3..Intron_3
hsa-mir-501	chrX	49661070	49661153	+	49573964	49750632	+	CLCN5	NM_001127899	Intron_3..Intron_3
hsa-mir-501	chrX	49661070	49661153	+	49573964	49750632	+	CLCN5	NM_001127898	Intron_3..Intron_3
hsa-mir-502	chrX	49665946	49666031	+	49573964	49750632	+	CLCN5	NM_001127899	Intron_3..Intron_3
hsa-mir-502	chrX	49665946	49666031	+	49573964	49750632	+	CLCN5	NM_001127898	Intron_3..Intron_3
hsa-mir-455	chr9	116011535	116011630	+	115958051	116112796	+	COL27A1	NM_032888	Intron_10..Intron_10
hsa-mir-148b	chr12	53017267	53017365	+	53005177	53031900	+	COPZ1	NM_016057	Intron_1..Intron_1
hsa-mir-152	chr17	43469526	43469612	-	43458531	43470151	-	COPZ2	NM_016429	Intron_8..Intron_8
hsa-mir-26b	chr2	218975613	218975689	+	218972721	218978908	+	CTDSP1	NM_021198	Intron_4..Intron_4
hsa-mir-26b	chr2	218975613	218975689	+	218973057	218977392	+	CTDSP1	NM_182642	Intron_4..Intron_4
hsa-mir-26a-2	chr12	56504659	56504742	-	56499976	56527014	-	CTDSP2	NM_005730	Intron_3..Intron_3
hsa-mir-26a-1	chr3	37985899	37985975	+	37878672	38000964	+	CTDSPL	NM_005808	Intron_4..Intron_4
hsa-mir-26a-1	chr3	37985899	37985975	+	37878672	38000964	+	CTDSPL	NM_001008392	Intron_5..Intron_5
hsa-mir-425	chr3	49032585	49032671	-	49027438	49033471	-	DALRD3	NM_018114	Intron_11..Intron_11
hsa-mir-191	chr3	49033055	49033146	-	49027438	49033471	-	DALRD3	NM_018114	Intron_11..Intron_11
hsa-mir-1255b-2	chr1	166234522	166234588	+	166172531	166311705	+	DCAF6	NM_018442	Intron_7..Intron_7
hsa-mir-1255b-2	chr1	166234522	166234588	+	166172531	166311705	+	DCAF6	NM_001017977	Intron_7..Intron_7
hsa-mir-616	chr12	56199213	56199309	-	56196637	56200567	-	DDIT3	NM_004083	Intron_3..Intron_3
hsa-mir-1306	chr22	18453581	18453665	+	18447833	18479400	+	DGCR8	NM_022720	Exon_2..Exon_2
hsa-mir-1226	chr3	47866049	47866123	+	47819402	47866689	+	DHX30	NM_014966	Intron_21..Exon_22
hsa-mir-1226	chr3	47866049	47866123	+	47819402	47866689	+	DHX30	NM_138615	Intron_20..Exon_21
hsa-mir-15a	chr13	49521256	49521338	-	49454688	49597678	-	DLEU2	NR_002612	Intron_7..Intron_7
hsa-mir-941-1	chr20	62021238	62021326	+	61996961	62035839	+	DNAJC5	NM_025219	Intron_1..Intron_1
hsa-mir-941-2	chr20	62021545	62021633	+	61996961	62035839	+	DNAJC5	NM_025219	Intron_1..Intron_1
hsa-mir-941-3	chr20	62021657	62021745	+	61996961	62035839	+	DNAJC5	NM_025219	Intron_1..Intron_1
hsa-mir-199b	chr9	130046821	130046930	-	130005483	130057348	+	DNM1	NM_004408	Intron_14..Intron_14
hsa-mir-199b	chr9	130046821	130046930	-	130005483	130057348	+	DNM1	NM_001005336	Intron_14..Intron_14
hsa-mir-199a-1	chr19	10789102	10789172	-	10689754	10803579	+	DNM2	NM_001005360	Intron_15..Intron_15
hsa-mir-199a-1	chr19	10789102	10789172	-	10689754	10803579	+	DNM2	NM_004945	Intron_14..Intron_14
hsa-mir-199a-1	chr19	10789102	10789172	-	10689754	10803579	+	DNM2	NM_001005362	Intron_14..Intron_14
hsa-mir-199a-1	chr19	10789102	10789172	-	10689754	10803579	+	DNM2	NM_001005361	Intron_15..Intron_15
hsa-mir-214	chr1	170374561	170374670	-	170077243	170648479	+	DNM3	NM_015569	Intron_14..Intron_14
hsa-mir-214	chr1	170374561	170374670	-	170077243	170648479	+	DNM3	NM_001136127	Intron_14..Intron_14
hsa-mir-199a-2	chr1	170380298	170380407	-	170077243	170648479	+	DNM3	NM_015569	Intron_14..Intron_14
hsa-mir-199a-2	chr1	170380298	170380407	-	170077243	170648479	+	DNM3	NM_001136127	Intron_14..Intron_14
hsa-mir-1301	chr2	25405013	25405094	-	25309348	25418278	-	DNMT3A	NM_022552	Intron_22..Intron_22
hsa-mir-1301	chr2	25405013	25405094	-	25309348	25418963	-	DNMT3A	NM_175629	Intron_22..Intron_22
hsa-mir-1301	chr2	25405013	25405094	-	25357824	25418963	-	DNMT3A	NM_175630	Intron_3..Intron_3
hsa-mir-548n	chr7	34946897	34946971	-	34935017	35044178	-	DPY19L1	NM_015283	Intron_4..Intron_4
hsa-mir-1280	chr3	129563698	129563791	+	129355002	129610179	+	EEFSEC	NM_021937	Intron_6..Intron_6
hsa-mir-126	chr9	138684875	138684959	+	138677202	138686951	+	EGFL7	NM_016215	Intron_7..Intron_7
hsa-mir-126	chr9	138684875	138684959	+	138677197	138686951	+	EGFL7	NM_201446	Intron_7..Intron_7
hsa-mir-1248	chr3	187987155	187987260	+	187984054	187990379	+	EIF4A2	NM_001967	Intron_7..Intron_7
hsa-mir-1256	chr1	21187394	21187512	-	21005560	21375927	-	EIF4G3	NM_003760	Intron_29..Intron_29
hsa-mir-590	chr7	73243464	73243560	+	73226641	73249365	+	EIF4H	NM_031992	Intron_4..Intron_4
hsa-mir-590	chr7	73243464	73243560	+	73226641	73249365	+	EIF4H	NM_022170	Intron_5..Intron_5
hsa-mir-328	chr16	65793725	65793799	-	65790528	65795428	+	ELMO3	NM_024712	Intron_13..Intron_13
hsa-mir-330	chr19	50834092	50834185	-	50804497	50834509	-	EML2	NM_012155	Intron_18..Intron_18
hsa-mir-342	chr14	99645745	99645843	+	99601503	99680326	+	EVL	NM_016337	Intron_3..Intron_3
hsa-mir-574	chr4	38546048	38546143	+	38545831	38621821	+	FAM114A1	NM_138389	Intron_1..Intron_1
hsa-mir-1267	chr13	106981520	106981597	-	106618880	107317461	-	FAM155A	NM_001080396	Intron_2..Intron_2
hsa-mir-548b	chr6	119431911	119432007	-	119322694	119441511	-	FAM184A	NM_024581	Intron_17..Intron_17
hsa-mir-548b	chr6	119431911	119432007	-	119322694	119512057	-	FAM184A	NM_001100411	Intron_16..Intron_16
hsa-mir-454	chr17	54569901	54570015	-	54542089	54587582	-	FAM33A	NM_182620	Intron_3..Intron_3
hsa-mir-454	chr17	54569901	54570015	-	54542089	54587582	-	FAM33A	NM_001100595	Intron_2..Intron_2
hsa-mir-301a	chr17	54583279	54583364	-	54542089	54587582	-	FAM33A	NM_182620	Intron_3..Intron_3
hsa-mir-301a	chr17	54583279	54583364	-	54542089	54587582	-	FAM33A	NM_001100595	Intron_2..Intron_2
hsa-mir-1302-5	chr20	48664580	48664729	-	48636052	48686833	-	FAM65C	NM_080829	Intron_18..Intron_18
hsa-mir-589	chr7	5501976	5502074	-	5481953	5519925	-	FBXL18	NM_024963	Intron_2..Intron_2
hsa-mir-887	chr5	15988291	15988369	+	15553304	15992900	+	FBXL7	NM_012304	Intron_3..Intron_3
hsa-mir-504	chrX	137577538	137577620	-	137541401	137621493	-	FGF13	NM_004114	Intron_2..Intron_2
hsa-mir-504	chrX	137577538	137577620	-	137541401	137649181	-	FGF13	NM_033642	Intron_2..Intron_2
hsa-mir-504	chrX	137577538	137577620	-	137541401	138114851	-	FGF13	NM_001139500	Intron_2..Intron_2
hsa-mir-504	chrX	137577538	137577620	-	137541401	138114851	-	FGF13	NM_001139501	Intron_2..Intron_2
hsa-mir-504	chrX	137577538	137577620	-	137541401	138114851	-	FGF13	NM_001139498	Intron_2..Intron_2
hsa-mir-504	chrX	137577538	137577620	-	137541401	137777383	-	FGF13	NM_001139502	Intron_2..Intron_2
hsa-mir-1284	chr3	71673811	71673930	-	71087425	71715830	-	FOXP1	NM_032682	Intron_19..Intron_19
hsa-mir-1284	chr3	71673811	71673930	-	71329723	71715830	-	FOXP1	NM_001012505	Intron_5..Intron_5
hsa-mir-1289-2	chr5	132791187	132791297	-	132560050	132976122	-	FSTL4	NM_015082	Intron_13..Intron_13
hsa-mir-625	chr14	65007573	65007657	+	64947592	65279715	+	FUT8	NM_178156	Intron_1..Intron_1
hsa-mir-625	chr14	65007573	65007657	+	64947592	65279715	+	FUT8	NM_178155	Intron_2..Intron_2
hsa-mir-625	chr14	65007573	65007657	+	64949287	65279715	+	FUT8	NM_004480	Intron_2..Intron_2
hsa-mir-625	chr14	65007573	65007657	+	64949287	65279715	+	FUT8	NM_178154	Intron_2..Intron_2
hsa-mir-105-1	chrX	151311347	151311427	-	151086289	151370487	-	GABRA3	NM_000808	Intron_9..Intron_9
hsa-mir-105-2	chrX	151313540	151313620	-	151086289	151370487	-	GABRA3	NM_000808	Intron_9..Intron_9
hsa-mir-767	chrX	151312549	151312657	-	151086289	151370487	-	GABRA3	NM_000808	Intron_9..Intron_9
hsa-mir-224	chrX	150877706	150877786	-	150872251	150893807	-	GABRE	NM_004961	Intron_3..Intron_3
hsa-mir-452	chrX	150878756	150878840	-	150872251	150893807	-	GABRE	NM_004961	Intron_3..Intron_3
hsa-mir-1294	chr5	153706859	153707000	+	153550487	153780003	+	GALNT10	NM_198321	Intron_4..Intron_4
hsa-mir-149	chr2	241044091	241044179	+	241023787	241056168	+	GPC1	NM_002081	Intron_1..Intron_1
hsa-mir-1262	chr1	68421789	68421881	-	68336738	68470841	-	GPR177	NM_001002292	Intron_10..Intron_10
hsa-mir-1262	chr1	68421789	68421881	-	68363628	68470841	-	GPR177	NM_024911	Intron_10..Intron_10
hsa-mir-561	chr2	188870464	188870560	+	188865634	189168897	+	GULP1	NM_016315	Intron_1..Intron_1
hsa-mir-675	chr11	1974565	1974637	-	1972981	1975641	-	H19	NR_002196	NA..NA
hsa-mir-7-1	chr9	85774483	85774592	-	85772817	85785004	-	HNRNPK	NM_031263	Intron_1..Intron_1
hsa-mir-7-1	chr9	85774483	85774592	-	85772817	85785389	-	HNRNPK	NM_002140	Intron_1..Intron_1
hsa-mir-7-1	chr9	85774483	85774592	-	85772817	85785389	-	HNRNPK	NM_031262	Intron_1..Intron_1
hsa-mir-615	chr12	52714001	52714096	+	52696908	52736081	+	HOXC4	NM_014620	Intron_1..Intron_1
hsa-mir-615	chr12	52714001	52714096	+	52696908	52715411	+	HOXC5	NR_003084	Intron_1..Intron_1
hsa-mir-615	chr12	52714001	52714096	+	52713098	52715411	+	HOXC5	NM_018953	Intron_1..Intron_1
hsa-mir-548h-3	chr17	13387571	13387688	-	13339730	13445969	-	HS3ST3A1	NM_006042	Intron_1..Intron_1
hsa-mir-98	chrX	53599909	53600027	-	53575796	53730398	-	HUWE1	NM_031407	Intron_24..Intron_24
hsa-let-7f-2	chrX	53600878	53600960	-	53575796	53730398	-	HUWE1	NM_031407	Intron_24..Intron_24
hsa-mir-215	chr1	218357818	218357927	-	218334077	218388006	+	IARS2	NM_018060	Intron_12..Intron_12
hsa-mir-194-1	chr1	218358122	218358206	-	218334077	218388006	+	IARS2	NM_018060	Intron_12..Intron_12
hsa-mir-483	chr11	2111940	2112015	-	2106922	2127409	-	IGF2	NM_001007139	Intron_2..Intron_2
hsa-mir-483	chr11	2111940	2112015	-	2106922	2116780	-	IGF2	NM_000612	Intron_2..Intron_2
hsa-mir-483	chr11	2111940	2112015	-	2106922	2118917	-	IGF2	NM_001127598	Intron_2..Intron_2
hsa-mir-483	chr11	2111940	2112015	-	2106925	2139015	-	INS-IGF2	NR_003512	Intron_2..Intron_2
hsa-mir-1296	chr10	64802723	64802814	-	64596993	64895728	-	JMJD1C	NM_032776	Intron_24..Intron_24
hsa-mir-549	chr15	78921374	78921469	-	78858766	79031054	+	KIAA1199	NM_018689	Intron_1..Intron_1
hsa-mir-1302-8	chr9	99165657	99165784	-	99040599	99179390	+	KIAA1529	NM_020893	Intron_40..Intron_40
hsa-mir-491	chr9	20706104	20706187	+	20648308	20985954	+	KIAA1797	NM_017794	Intron_4..Intron_4
hsa-mir-1276	chr15	84114731	84114813	-	84103562	84139193	-	KLHL25	NM_022480	Intron_2..Intron_2
hsa-mir-874	chr5	137011160	137011237	-	136981087	137099678	-	KLHL3	NM_017415	Intron_7..Intron_7
hsa-mir-1285-1	chr7	91671265	91671348	-	91666218	91713148	-	KRIT1	NM_004912	Intron_2..Intron_2
hsa-mir-1285-1	chr7	91671265	91671348	-	91666218	91713350	-	KRIT1	NM_194455	Intron_2..Intron_2
hsa-mir-1285-1	chr7	91671265	91671348	-	91666218	91713350	-	KRIT1	NM_194456	Intron_2..Intron_2
hsa-mir-1285-1	chr7	91671265	91671348	-	91666218	91713164	-	KRIT1	NM_001013406	Intron_2..Intron_2
hsa-mir-1285-1	chr7	91671265	91671348	-	91666218	91713164	-	KRIT1	NM_194454	Intron_2..Intron_2
hsa-mir-618	chr12	79853646	79853743	-	79715301	79855825	-	LIN7A	NM_004664	Intron_5..Intron_5
hsa-mir-100	chr11	121528147	121528226	-	121465022	121578980	-	LOC399959	NR_024430	Intron_1..Intron_1
hsa-mir-125b-1	chr11	121475675	121475762	-	121465022	121578980	-	LOC399959	NR_024430	Intron_1..Intron_1
hsa-let-7a-2	chr11	121522440	121522511	-	121465022	121578980	-	LOC399959	NR_024430	Intron_1..Intron_1
hsa-let-7b	chr22	44888230	44888312	+	44860540	44888470	+	LOC400931	NR_027033	NA..NA
hsa-mir-31	chr9	21502114	21502184	-	21444266	21549697	-	LOC554202	NR_027054	Intron_3..Intron_3
hsa-mir-9-2	chr5	87998427	87998513	-	87872352	88016376	-	LOC645323	NR_015436	Intron_2..Intron_2
hsa-mir-9-2	chr5	87998427	87998513	-	87996019	88004902	-	LOC645323	NR_024384	Exon_1..Exon_1
hsa-mir-9-2	chr5	87998427	87998513	-	87996019	88010018	-	LOC645323	NR_024383	Exon_1..Exon_1
hsa-mir-143	chr5	148788674	148788779	+	148766632	148792592	+	LOC728264	NR_027180	NA..NA
hsa-mir-145	chr5	148790402	148790489	+	148766632	148792592	+	LOC728264	NR_027180	NA..NA
hsa-mir-28	chr3	189889263	189889348	+	189413414	190080135	+	LPP	NM_005578	Intron_6..Intron_6
hsa-mir-1228	chr12	55874554	55874626	+	55808548	55893392	+	LRP1	NM_002332	Intron_49..Exon_50
hsa-mir-744	chr17	11925941	11926038	+	11864859	11987776	+	MAP2K4	NM_003010	Intron_3..Intron_3
hsa-mir-25	chr7	99529119	99529202	-	99528339	99536316	-	MCM7	NM_182776	Intron_2..Intron_2
hsa-mir-25	chr7	99529119	99529202	-	99528339	99537363	-	MCM7	NM_005916	Intron_2..Intron_2
hsa-mir-93	chr7	99529327	99529406	-	99528339	99536316	-	MCM7	NM_182776	Intron_2..Intron_2
hsa-mir-93	chr7	99529327	99529406	-	99528339	99537363	-	MCM7	NM_005916	Intron_2..Intron_2
hsa-mir-106b	chr7	99529552	99529633	-	99528339	99536316	-	MCM7	NM_182776	Intron_2..Intron_2
hsa-mir-106b	chr7	99529552	99529633	-	99528339	99537363	-	MCM7	NM_005916	Intron_2..Intron_2
hsa-mir-335	chr7	129923188	129923281	+	129913281	129933367	+	MEST	NM_177524	Intron_2..Intron_2
hsa-mir-335	chr7	129923188	129923281	+	129918408	129933367	+	MEST	NM_177525	Intron_2..Intron_2
hsa-mir-335	chr7	129923188	129923281	+	129919173	129933367	+	MEST	NM_002402	Intron_2..Intron_2
hsa-mir-503	chrX	133508024	133508094	-	133505073	133508326	-	MGC16121	NR_024607	Intron_2..Intron_2
hsa-mir-424	chrX	133508310	133508407	-	133505073	133508326	-	MGC16121	NR_024607	NA..NA
hsa-mir-1-2	chr18	17662963	17663047	-	17575542	17704910	+	MIB1	NM_020774	Intron_12..Intron_12
hsa-mir-17	chr13	90800860	90800943	+	90798074	90804830	+	MIRHG1	NR_027349	Intron_3..Intron_3
hsa-mir-17	chr13	90800860	90800943	+	90798074	90804830	+	MIRHG1	NR_027350	NA..NA
hsa-mir-18a	chr13	90801006	90801076	+	90798074	90804830	+	MIRHG1	NR_027349	Intron_3..Intron_3
hsa-mir-18a	chr13	90801006	90801076	+	90798074	90804830	+	MIRHG1	NR_027350	NA..NA
hsa-mir-19a	chr13	90801146	90801227	+	90798074	90804830	+	MIRHG1	NR_027349	Intron_3..Intron_3
hsa-mir-19a	chr13	90801146	90801227	+	90798074	90804830	+	MIRHG1	NR_027350	NA..NA
hsa-mir-20a	chr13	90801320	90801390	+	90798074	90804830	+	MIRHG1	NR_027349	Intron_3..Intron_3
hsa-mir-20a	chr13	90801320	90801390	+	90798074	90804830	+	MIRHG1	NR_027350	NA..NA
hsa-mir-92a-1	chr13	90801569	90801646	+	90798074	90804830	+	MIRHG1	NR_027349	Intron_3..Intron_3
hsa-mir-92a-1	chr13	90801569	90801646	+	90798074	90804830	+	MIRHG1	NR_027350	NA..NA
hsa-mir-155	chr21	25868163	25868227	+	25856327	25869344	+	MIRHG2	NR_001458	NA..NA
hsa-mir-548l	chr11	93839309	93839394	-	93790114	93866688	-	MRE11A	NM_005591	Intron_10..Intron_10
hsa-mir-548l	chr11	93839309	93839394	-	93790114	93866688	-	MRE11A	NM_005590	Intron_9..Intron_9
hsa-mir-499	chr20	33041840	33041961	+	33026866	33053897	+	MYH7B	NM_020884	Intron_20..Intron_20
hsa-mir-1266	chr15	50356606	50356689	-	50271811	50375262	-	MYO5C	NM_018728	Intron_37..Intron_37
hsa-mir-484	chr16	15644652	15644730	+	15644624	15727707	+	NDE1	NM_001143979	Exon_1..Exon_1
hsa-mir-191	chr3	49033055	49033146	-	49032911	49035930	+	NDUFAF3	NM_199074	Intron_1..Intron_1
hsa-mir-30e	chr1	40992614	40992705	+	40929828	41009860	+	NFYC	NM_001142588	Intron_5..Intron_5
hsa-mir-30e	chr1	40992614	40992705	+	40929828	41009860	+	NFYC	NM_001142589	Intron_4..Intron_4
hsa-mir-30e	chr1	40992614	40992705	+	40929828	41009860	+	NFYC	NM_014223	Intron_5..Intron_5
hsa-mir-30e	chr1	40992614	40992705	+	40929828	41009860	+	NFYC	NM_001142587	Intron_5..Intron_5
hsa-mir-30e	chr1	40992614	40992705	+	40930266	41009860	+	NFYC	NM_001142590	Intron_10..Intron_10
hsa-mir-30c-1	chr1	40995543	40995631	+	40929828	41009860	+	NFYC	NM_001142588	Intron_5..Intron_5
hsa-mir-30c-1	chr1	40995543	40995631	+	40929828	41009860	+	NFYC	NM_001142589	Intron_4..Intron_4
hsa-mir-30c-1	chr1	40995543	40995631	+	40929828	41009860	+	NFYC	NM_014223	Intron_5..Intron_5
hsa-mir-30c-1	chr1	40995543	40995631	+	40929828	41009860	+	NFYC	NM_001142587	Intron_5..Intron_5
hsa-mir-30c-1	chr1	40995543	40995631	+	40930266	41009860	+	NFYC	NM_001142590	Intron_10..Intron_10
hsa-mir-1260	chr14	76802314	76802386	+	76801586	76807408	-	NGB	NM_021257	Exon_1..Exon_1
hsa-mir-1292	chr20	2581423	2581488	+	2581253	2587038	+	NOP56	NR_027700	Intron_1..Exon_2
hsa-mir-1292	chr20	2581423	2581488	+	2581253	2587039	+	NOP56	NM_006392	Intron_1..Exon_2
hsa-mir-556	chr1	160578960	160579054	+	160306204	160606437	+	NOS1AP	NM_014697	Intron_5..Intron_5
hsa-mir-181a-2	chr9	126494542	126494651	+	126324523	126573397	-	NR6A1	NM_033334	Intron_8..Intron_8
hsa-mir-181a-2	chr9	126494542	126494651	+	126324523	126573397	-	NR6A1	NM_001489	Intron_8..Intron_8
hsa-mir-181b-2	chr9	126495810	126495898	+	126324523	126573397	-	NR6A1	NM_033334	Intron_8..Intron_8
hsa-mir-181b-2	chr9	126495810	126495898	+	126324523	126573397	-	NR6A1	NM_001489	Intron_8..Intron_8
hsa-mir-320b-2	chr1	222511329	222511466	-	222481658	222584495	-	NVL	NM_002533	Intron_5..Intron_5
hsa-mir-320b-2	chr1	222511329	222511466	-	222481658	222584495	-	NVL	NM_206840	Intron_5..Intron_5
hsa-mir-708	chr11	78790714	78790801	-	78041975	78829343	-	ODZ4	NM_001098816	Intron_33..Intron_33
hsa-mir-320c-2	chr18	20155648	20155697	+	19996008	20231788	-	OSBPL1A	NM_080597	Intron_21..Intron_21
hsa-mir-107	chr10	91342484	91342564	-	91332728	91393627	-	PANK1	NM_138316	Intron_2..Intron_2
hsa-mir-107	chr10	91342484	91342564	-	91332728	91393627	-	PANK1	NM_148978	Intron_2..Intron_2
hsa-mir-107	chr10	91342484	91342564	-	91332728	91395195	-	PANK1	NM_148977	Intron_2..Intron_2
hsa-mir-103-2	chr20	3846141	3846218	+	3818462	3852502	+	PANK2	NM_153640	Intron_5..Intron_5
hsa-mir-103-2	chr20	3846141	3846218	+	3817485	3852502	+	PANK2	NM_024960	Intron_5..Intron_5
hsa-mir-103-2	chr20	3846141	3846218	+	3817741	3852502	+	PANK2	NM_153638	Intron_5..Intron_5
hsa-mir-103-2-as	chr20	3846149	3846210	-	3818462	3852502	+	PANK2	NM_153640	Intron_5..Intron_5
hsa-mir-103-2-as	chr20	3846149	3846210	-	3817485	3852502	+	PANK2	NM_024960	Intron_5..Intron_5
hsa-mir-103-2-as	chr20	3846149	3846210	-	3817741	3852502	+	PANK2	NM_153638	Intron_5..Intron_5
hsa-mir-103-1	chr5	167920479	167920556	-	167915207	167939166	-	PANK3	NM_024594	Intron_2..Intron_2
hsa-mir-103-1-as	chr5	167920487	167920548	+	167915207	167939166	-	PANK3	NM_024594	Intron_2..Intron_2
hsa-mir-139	chr11	72003755	72003822	-	71964833	72031152	-	PDE2A	NM_001143839	Intron_29..Intron_29
hsa-mir-139	chr11	72003755	72003822	-	71964833	72031135	-	PDE2A	NR_026572	Intron_29..Intron_29
hsa-mir-139	chr11	72003755	72003822	-	71964833	72063142	-	PDE2A	NM_002599	Intron_29..Intron_29
hsa-mir-139	chr11	72003755	72003822	-	71964833	72057756	-	PDE2A	NM_001146209	Intron_29..Intron_29
hsa-mir-582	chr5	59035189	59035286	-	58300622	59225378	-	PDE4D	NM_001104631	Intron_14..Intron_14
hsa-mir-1308	chrX	21990180	21990233	-	21960841	22176399	+	PHEX	NM_000444	Intron_3..Intron_3
hsa-mir-548d-2	chr17	62898067	62898163	-	62804385	63120109	+	PITPNC1	NM_012417	Intron_1..Intron_1
hsa-mir-548d-2	chr17	62898067	62898163	-	62804385	63120109	+	PITPNC1	NM_181671	Intron_1..Intron_1
hsa-mir-1274a	chr5	41511491	41511561	+	41342804	41546487	-	PLCXD3	NM_001005473	Intron_2..Intron_2
hsa-mir-1227	chr19	2185061	2185148	-	2184154	2187328	-	PLEKHJ1	NM_018049	Intron_2..Exon_3
hsa-mir-149	chr2	241044091	241044179	+	241037508	241044790	-	PP14571	NR_024014	Intron_1..Intron_1
hsa-mir-378	chr5	149092581	149092646	+	149090056	149207462	+	PPARGC1B	NM_133263	Intron_1..Intron_1
hsa-mir-548k	chr11	69807709	69807824	+	69794470	69908150	+	PPFIA1	NM_003626	Intron_2..Intron_2
hsa-mir-548k	chr11	69807709	69807824	+	69794470	69902146	+	PPFIA1	NM_177423	Intron_2..Intron_2
hsa-mir-1255a	chr4	102470482	102470594	-	102163609	102487651	-	PPP3CA	NM_000944	Intron_13..Intron_13
hsa-mir-1255a	chr4	102470482	102470594	-	102163609	102487651	-	PPP3CA	NM_001130692	Intron_11..Intron_11
hsa-mir-1255a	chr4	102470482	102470594	-	102163609	102487651	-	PPP3CA	NM_001130691	Intron_12..Intron_12
hsa-mir-605	chr10	52729339	52729421	+	52420950	53725280	+	PRKG1	NM_001098512	Intron_2..Intron_2
hsa-mir-605	chr10	52729339	52729421	+	52504239	53725280	+	PRKG1	NM_006258	Intron_2..Intron_2
hsa-mir-548o	chr7	101833194	101833307	-	101823808	101854134	+	PRKRIP1	NM_024653	Intron_4..Intron_4
hsa-mir-151	chr8	141811845	141811934	-	141737682	142080514	-	PTK2	NM_005607	Intron_10..Intron_10
hsa-mir-151	chr8	141811845	141811934	-	141737682	142080514	-	PTK2	NM_153831	Intron_10..Intron_10
hsa-mir-1287	chr10	100144965	100145054	-	100133312	100164968	-	PYROXD2	NM_032709	Exon_9..Intron_9
hsa-mir-128-1	chr2	136139437	136139518	+	136005552	136199309	+	R3HDM1	NM_015361	Intron_18..Intron_18
hsa-mir-664	chr1	218440503	218440584	-	218388232	218512466	-	RAB3GAP2	NM_012414	Intron_26..Intron_26
hsa-mir-548c	chr12	63302556	63302652	+	63290559	63375459	+	RASSF3	NM_178169	Intron_1..Intron_1
hsa-mir-1272	chr15	62841639	62841767	-	62819147	62854823	-	RBPMS2	NM_194272	Intron_7..Intron_7
hsa-mir-101-2	chr9	4840297	4840375	+	4782833	4851064	+	RCL1	NM_005772	Intron_8..Intron_8
hsa-mir-340	chr5	179374909	179375003	-	179315079	179431715	-	RNF130	NM_018434	Intron_7..Intron_7
hsa-mir-431	chr14	100417097	100417210	+	100416744	100420937	-	RTL1	NM_001134888	NA..NA
hsa-mir-433	chr14	100417976	100418068	+	100416744	100420937	-	RTL1	NM_001134888	NA..NA
hsa-mir-432	chr14	100420573	100420666	+	100416744	100420937	-	RTL1	NM_001134888	NA..NA
hsa-mir-136	chr14	100420792	100420873	+	100416744	100420937	-	RTL1	NM_001134888	NA..NA
hsa-mir-127	chr14	100419069	100419165	+	100416744	100420937	-	RTL1	NM_001134888	NA..NA
hsa-mir-1286	chr22	18616657	18616734	-	18608937	18635816	-	RTN4R	NM_023004	Intron_1..Intron_1
hsa-mir-576	chr4	110629303	110629400	+	110574419	110681064	+	SEC24B	NM_001042734	Intron_3..Intron_3
hsa-mir-576	chr4	110629303	110629400	+	110574419	110681064	+	SEC24B	NM_006323	Intron_4..Intron_4
hsa-mir-383	chr8	14755318	14755390	-	13991743	15140163	-	SGCZ	NM_139167	Intron_7..Intron_7
hsa-mir-584	chr5	148422069	148422165	-	148341905	148422930	-	SH3TC2	NM_024577	Intron_16..Intron_16
hsa-mir-548e	chr10	112738674	112738761	+	112669290	112763414	+	SHOC2	NM_007373	Intron_3..Intron_3
hsa-mir-218-1	chr4	20138996	20139105	+	19864332	20229886	+	SLIT2	NM_004787	Intron_15..Intron_15
hsa-mir-585	chr5	168623183	168623276	-	168025648	168660711	-	SLIT3	NM_003062	Intron_35..Intron_35
hsa-mir-218-2	chr5	168127729	168127838	-	168025648	168660711	-	SLIT3	NM_003062	Intron_22..Intron_22
hsa-mir-15b	chr3	161605070	161605167	+	161601040	161635435	+	SMC4	NM_005496	Intron_4..Intron_4
hsa-mir-15b	chr3	161605070	161605167	+	161600123	161635435	+	SMC4	NM_001002800	Intron_5..Intron_5
hsa-mir-16-2	chr3	161605227	161605307	+	161601040	161635435	+	SMC4	NM_005496	Intron_4..Intron_4
hsa-mir-16-2	chr3	161605227	161605307	+	161600123	161635435	+	SMC4	NM_001002800	Intron_5..Intron_5
hsa-mir-1291	chr12	47334494	47334580	-	47334431	47334568	-	SNORA34	NR_002968	NA..NA
hsa-mir-33b	chr17	17657875	17657970	-	17656110	17681050	-	SREBF1	NM_004176	Intron_3..Intron_3
hsa-mir-33b	chr17	17657875	17657970	-	17656110	17681050	-	SREBF1	NM_001005291	Intron_3..Intron_3
hsa-mir-33a	chr22	40626894	40626962	+	40559051	40632321	+	SREBF2	NM_004599	Intron_16..Intron_16
hsa-mir-548p	chr5	100180085	100180168	-	100170538	100266886	-	ST8SIA4	NM_005668	Intron_1..Intron_1
hsa-mir-548h-1	chr14	63631495	63631596	-	63389435	63762922	+	SYNE2	NM_015180	Intron_61..Intron_61
hsa-mir-548h-1	chr14	63631495	63631596	-	63389435	63762922	+	SYNE2	NM_182914	Intron_61..Intron_61
hsa-mir-1252	chr12	78337168	78337232	+	77781903	78369918	+	SYT1	NM_001135805	Intron_10..Intron_10
hsa-mir-1252	chr12	78337168	78337232	+	77782579	78369918	+	SYT1	NM_005639	Intron_9..Intron_9
hsa-mir-1252	chr12	78337168	78337232	+	77963563	78369918	+	SYT1	NM_001135806	Intron_8..Intron_8
hsa-mir-629	chr15	68158765	68158861	-	68127596	68177310	-	TLE3	NM_001105192	Intron_16..Intron_16
hsa-mir-629	chr15	68158765	68158861	-	68127596	68177310	-	TLE3	NM_020908	Intron_16..Intron_16
hsa-mir-629	chr15	68158765	68158861	-	68127596	68177310	-	TLE3	NM_005078	Intron_16..Intron_16
hsa-mir-190	chr15	60903209	60903293	+	60726801	60923882	+	TLN2	NM_015059	Intron_51..Intron_51
hsa-mir-652	chrX	109185213	109185310	+	109133017	109303430	+	TMEM164	NM_032227	Intron_2..Intron_2
hsa-mir-944	chr3	191030405	191030492	+	190990142	191081978	+	TP63	NM_001114982	Intron_2..Intron_2
hsa-mir-944	chr3	191030405	191030492	+	190831909	191081978	+	TP63	NM_001114979	Intron_4..Intron_4
hsa-mir-944	chr3	191030405	191030492	+	190831909	191097762	+	TP63	NM_003722	Intron_4..Intron_4
hsa-mir-944	chr3	191030405	191030492	+	190990142	191097762	+	TP63	NM_001114981	Intron_2..Intron_2
hsa-mir-944	chr3	191030405	191030492	+	190990142	191097762	+	TP63	NM_001114980	Intron_2..Intron_2
hsa-mir-944	chr3	191030405	191030492	+	190831909	191097762	+	TP63	NM_001114978	Intron_4..Intron_4
hsa-mir-548j	chr22	25281178	25281289	-	25251713	25291370	-	TPST2	NM_001008566	Intron_6..Intron_6
hsa-mir-548j	chr22	25281178	25281289	-	25251713	25316089	-	TPST2	NM_003595	Intron_6..Intron_6
hsa-mir-211	chr15	29144527	29144636	-	29080842	29181216	-	TRPM1	NM_002420	Intron_21..Intron_21
hsa-mir-204	chr9	72614711	72614820	-	72339785	72673794	-	TRPM3	NM_206944	Intron_18..Intron_18
hsa-mir-204	chr9	72614711	72614820	-	72339785	72673794	-	TRPM3	NM_024971	Intron_20..Intron_20
hsa-mir-204	chr9	72614711	72614820	-	72339785	72673794	-	TRPM3	NM_206947	Intron_18..Intron_18
hsa-mir-204	chr9	72614711	72614820	-	72588597	72673794	-	TRPM3	NM_206948	Intron_1..Intron_1
hsa-mir-204	chr9	72614711	72614820	-	72339785	72673794	-	TRPM3	NM_020952	Intron_19..Intron_19
hsa-mir-204	chr9	72614711	72614820	-	72588597	72673794	-	TRPM3	NM_001007470	Intron_1..Intron_1
hsa-mir-204	chr9	72614711	72614820	-	72339785	72673794	-	TRPM3	NM_206945	Intron_19..Intron_19
hsa-mir-204	chr9	72614711	72614820	-	72339785	72673794	-	TRPM3	NM_206946	Intron_19..Intron_19
hsa-mir-204	chr9	72614711	72614820	-	72339785	72926334	-	TRPM3	NM_001007471	Intron_19..Intron_19
hsa-mir-942	chr1	117438788	117438873	+	117404471	117447014	+	TTF2	NM_003594	Intron_18..Intron_18
hsa-mir-577	chr4	115797364	115797459	+	115762971	115817651	+	UGT8	NM_003360	Intron_1..Intron_1
hsa-mir-577	chr4	115797364	115797459	+	115739059	115817651	+	UGT8	NM_001128174	Intron_2..Intron_2
hsa-mir-1307	chr10	105144000	105144148	-	105138803	105146213	-	USMG5	NM_032747	Exon_4..Intron_4
hsa-mir-627	chr15	40279060	40279156	-	40238190	40287794	-	VPS39	NM_015289	Intron_23..Intron_23
hsa-mir-1224	chr3	185441887	185441971	+	185431010	185442810	+	VWA5B2	NM_138345	Intron_18..NA
hsa-mir-1277	chrX	117404385	117404462	+	117364069	117467951	+	WDR44	NM_019045	Intron_2..Intron_2
hsa-let-7g	chr3	52277334	52277417	-	52263477	52287699	-	WDR82	NM_025222	Intron_7..Intron_7
hsa-mir-140	chr16	68524485	68524584	+	68353774	68533144	+	WWP2	NM_007014	Intron_17..Intron_17
hsa-mir-598	chr8	10930126	10930222	-	10791066	11096285	-	XKR6	NM_173683	Intron_2..Intron_2
hsa-mir-643	chr19	57476862	57476958	+	57464635	57487788	+	ZNF766	NM_001010851	Intron_1..Intron_1
hsa-mir-1270	chr19	20371080	20371162	-	20366359	20399602	-	ZNF826	NM_001039884	Intron_1..Intron_1
hsa-mir-550-1	chr7	30295935	30296031	+	30290447	30373833	+	ZNRF2	NM_147128	Intron_1..Intron_1
hsa-mir-186	chr1	71305902	71305987	-	71301561	71319333	-	ZRANB2	NM_203350	Intron_2..Intron_2
hsa-mir-186	chr1	71305902	71305987	-	71301561	71319333	-	ZRANB2	NM_005455	Intron_3..Intron_3

## Sheet: mirBAse-ver13-chr-map
miRNA name	Chr	ProbeStart	ProbeEnd	ChrStrand	GeneStart	GeneEnd	GeneStrand	GeneName	AccnNo	Map-on-gene
hsa-mir-551a	chr1	3467119	3467214	-	3394365	3517919	-	MEGF6	NM_001409	Intron_33..Intron_33
hsa-mir-1290	chr1	19096152	19096229	-	19070512	19101880	-	ALDH4A1	NM_170726	Intron_15..Intron_15
hsa-mir-1290	chr1	19096152	19096229	-	19070512	19101880	-	ALDH4A1	NM_003748	Intron_14..Intron_14
hsa-mir-1256	chr1	21187394	21187512	-	21005560	21375927	-	EIF4G3	NM_003760	Intron_29..Intron_29
hsa-mir-1976	chr1	26753620	26753671	+	26728835	26774107	+	RPS6KA1	NM_002953	Intron_8..Intron_8
hsa-mir-1976	chr1	26753620	26753671	+	26744929	26774107	+	RPS6KA1	NM_001006665	Intron_7..Intron_7
hsa-mir-30e	chr1	40992614	40992705	+	40929828	41009860	+	NFYC	NM_001142588	Intron_5..Intron_5
hsa-mir-30e	chr1	40992614	40992705	+	40929828	41009860	+	NFYC	NM_001142589	Intron_4..Intron_4
hsa-mir-30e	chr1	40992614	40992705	+	40929828	41009860	+	NFYC	NM_014223	Intron_5..Intron_5
hsa-mir-30e	chr1	40992614	40992705	+	40929828	41009860	+	NFYC	NM_001142587	Intron_5..Intron_5
hsa-mir-30e	chr1	40992614	40992705	+	40930266	41009860	+	NFYC	NM_001142590	Intron_10..Intron_10
hsa-mir-30c-1	chr1	40995543	40995631	+	40929828	41009860	+	NFYC	NM_001142588	Intron_5..Intron_5
hsa-mir-30c-1	chr1	40995543	40995631	+	40929828	41009860	+	NFYC	NM_001142589	Intron_4..Intron_4
hsa-mir-30c-1	chr1	40995543	40995631	+	40929828	41009860	+	NFYC	NM_014223	Intron_5..Intron_5
hsa-mir-30c-1	chr1	40995543	40995631	+	40929828	41009860	+	NFYC	NM_001142587	Intron_5..Intron_5
hsa-mir-30c-1	chr1	40995543	40995631	+	40930266	41009860	+	NFYC	NM_001142590	Intron_10..Intron_10
hsa-mir-1262	chr1	68421789	68421881	-	68336738	68470841	-	GPR177	NM_001002292	Intron_10..Intron_10
hsa-mir-1262	chr1	68421789	68421881	-	68363628	68470841	-	GPR177	NM_024911	Intron_10..Intron_10
hsa-mir-186	chr1	71305902	71305987	-	71301561	71319333	-	ZRANB2	NM_203350	Intron_2..Intron_2
hsa-mir-186	chr1	71305902	71305987	-	71301561	71319333	-	ZRANB2	NM_005455	Intron_3..Intron_3
hsa-mir-553	chr1	100519385	100519452	+	100504301	100530911	+	RTCD1	NM_003729	Intron_8..Intron_8
hsa-mir-553	chr1	100519385	100519452	+	100504301	100530911	+	RTCD1	NM_001130841	Intron_9..Intron_9
hsa-mir-942	chr1	117438788	117438873	+	117404471	117447014	+	TTF2	NM_003594	Intron_18..Intron_18
hsa-mir-554	chr1	149784896	149784991	+	149779404	149822683	+	TUFT1	NM_001126337	Intron_1..Intron_1
hsa-mir-554	chr1	149784896	149784991	+	149779404	149822683	+	TUFT1	NM_020127	Intron_1..Intron_1
hsa-mir-555	chr1	153582765	153582860	-	153571675	153798948	-	ASH1L	NM_018489	Intron_7..Exon_8
hsa-mir-9-1	chr1	154656757	154656845	-	154640678	154665808	-	C1orf61	NM_006365	Intron_5..Intron_5
hsa-mir-765	chr1	155172547	155172660	-	155171255	155281786	-	ARHGEF11	NM_014784	Intron_1..Intron_1
hsa-mir-765	chr1	155172547	155172660	-	155171255	155281786	-	ARHGEF11	NM_198236	Intron_1..Intron_1
hsa-mir-556	chr1	160578960	160579054	+	160306204	160606437	+	NOS1AP	NM_014697	Intron_5..Intron_5
hsa-mir-921	chr1	164390604	164390659	-	164305879	164402830	-	FAM78B	NM_001017961	Intron_1..Intron_1
hsa-mir-1255b-2	chr1	166234522	166234588	+	166172531	166311705	+	DCAF6	NM_018442	Intron_7..Intron_7
hsa-mir-1255b-2	chr1	166234522	166234588	+	166172531	166311705	+	DCAF6	NM_001017977	Intron_7..Intron_7
hsa-mir-1295	chr1	169337493	169337571	-	169326659	169353583	+	FMO3	NM_006894	Intron_2..Intron_2
hsa-mir-1295	chr1	169337493	169337571	-	169326659	169353583	+	FMO3	NM_001002294	Intron_2..Intron_2
hsa-mir-214	chr1	170374561	170374670	-	170077243	170648479	+	DNM3	NM_015569	Intron_14..Intron_14
hsa-mir-214	chr1	170374561	170374670	-	170077243	170648479	+	DNM3	NM_001136127	Intron_14..Intron_14
hsa-mir-199a-2	chr1	170380298	170380407	-	170077243	170648479	+	DNM3	NM_015569	Intron_14..Intron_14
hsa-mir-199a-2	chr1	170380298	170380407	-	170077243	170648479	+	DNM3	NM_001136127	Intron_14..Intron_14
hsa-mir-488	chr1	175265122	175265204	-	175096825	175400647	-	ASTN1	NM_004319	Intron_18..Intron_18
hsa-mir-488	chr1	175265122	175265204	-	175104576	175400647	-	ASTN1	NM_207108	Intron_17..Intron_17
hsa-mir-1278	chr1	191372256	191372336	+	191357710	191490563	+	CDC73	NM_024529	Intron_5..Intron_5
hsa-mir-1231	chr1	200044362	200044453	+	199884072	200062720	+	NAV1	NM_020443	Intron_18..Exon_19
hsa-mir-205	chr1	207672101	207672210	+	207668790	207672515	+	LOC642587	NM_001104548	Intron_3..NA
hsa-mir-215	chr1	218357818	218357927	-	218334077	218388006	+	IARS2	NM_018060	Intron_12..Intron_12
hsa-mir-194-1	chr1	218358122	218358206	-	218334077	218388006	+	IARS2	NM_018060	Intron_12..Intron_12
hsa-mir-664	chr1	218440503	218440584	-	218388232	218512466	-	RAB3GAP2	NM_012414	Intron_26..Intron_26
hsa-mir-320b-2	chr1	222511329	222511466	-	222481658	222584495	-	NVL	NM_002533	Intron_5..Intron_5
hsa-mir-320b-2	chr1	222511329	222511466	-	222481658	222584495	-	NVL	NM_206840	Intron_5..Intron_5
hsa-mir-1182	chr1	229222197	229222293	-	229221326	229242618	-	FAM89A	NM_198552	Exon_1..Exon_1
hsa-mir-1537	chr1	234082923	234082983	-	233890968	234096843	-	LYST	NM_000081	Intron_52..Intron_52
hsa-mir-511-1	chr10	17927113	17927199	+	17891367	17993184	+	MRC1	NM_002438	NA..NA
hsa-mir-511-1	chr10	17927113	17927199	+	17891367	17993184	+	MRC1L1	NM_001009567	NA..NA
hsa-mir-511-2	chr10	18174042	18174128	+	18138357	18240097	+	MRC1L1	NM_001009567	Intron_5..Intron_5
hsa-mir-511-2	chr10	18174042	18174128	+	18138357	18240097	+	MRC1	NM_002438	Intron_5..Intron_5
hsa-mir-1915	chr10	21825497	21825576	-	21823426	21826219	-	C10orf114	NM_001010911	Intron_1..Intron_1
hsa-mir-603	chr10	24604620	24604716	+	24023680	24876778	+	KIAA1217	NM_001098500	Intron_3..Intron_3
hsa-mir-603	chr10	24604620	24604716	+	24537725	24876778	+	KIAA1217	NM_001098501	Intron_2..Intron_2
hsa-mir-603	chr10	24604620	24604716	+	24537725	24876778	+	KIAA1217	NM_019590	Intron_2..Intron_2
hsa-mir-604	chr10	29873939	29874032	-	29786282	30064736	-	SVIL	NM_003174	Intron_28..Intron_28
hsa-mir-604	chr10	29873939	29874032	-	29786282	29963907	-	SVIL	NM_021738	Intron_32..Intron_32
hsa-mir-938	chr10	29931199	29931281	-	29786282	30064736	-	SVIL	NM_003174	Intron_33..Intron_33
hsa-mir-938	chr10	29931199	29931281	-	29786282	29963907	-	SVIL	NM_021738	Intron_37..Intron_37
hsa-mir-605	chr10	52729339	52729421	+	52420950	53725280	+	PRKG1	NM_001098512	Intron_2..Intron_2
hsa-mir-605	chr10	52729339	52729421	+	52504239	53725280	+	PRKG1	NM_006258	Intron_2..Intron_2
hsa-mir-548f-1	chr10	56037640	56037723	-	55232540	56231057	-	PCDH15	NM_001142772	Intron_32..Intron_32
hsa-mir-548f-1	chr10	56037640	56037723	-	55232540	56231057	-	PCDH15	NM_001142771	Intron_33..Intron_33
hsa-mir-548f-1	chr10	56037640	56037723	-	55238458	56231057	-	PCDH15	NM_001142769	Intron_34..Intron_34
hsa-mir-548f-1	chr10	56037640	56037723	-	55238458	56231057	-	PCDH15	NM_001142770	Intron_33..Intron_33
hsa-mir-548f-1	chr10	56037640	56037723	-	55250865	56231057	-	PCDH15	NM_001142768	Intron_31..Intron_31
hsa-mir-548f-1	chr10	56037640	56037723	-	55250865	56231057	-	PCDH15	NM_033056	Intron_31..Intron_31
hsa-mir-548f-1	chr10	56037640	56037723	-	55250865	56231057	-	PCDH15	NM_001142773	Intron_30..Intron_30
hsa-mir-548f-1	chr10	56037640	56037723	-	55250865	56231057	-	PCDH15	NM_001142766	Intron_30..Intron_30
hsa-mir-548f-1	chr10	56037640	56037723	-	55250865	56231057	-	PCDH15	NM_001142765	Intron_30..Intron_30
hsa-mir-548f-1	chr10	56037640	56037723	-	55250865	56231057	-	PCDH15	NM_001142764	Intron_32..Intron_32
hsa-mir-548f-1	chr10	56037640	56037723	-	55250865	56231057	-	PCDH15	NM_001142763	Intron_33..Intron_33
hsa-mir-548f-1	chr10	56037640	56037723	-	55250865	56231057	-	PCDH15	NM_001142767	Intron_29..Intron_29
hsa-mir-1296	chr10	64802723	64802814	-	64596993	64895728	-	JMJD1C	NM_032776	Intron_24..Intron_24
hsa-mir-1254	chr10	70189081	70189177	+	70150976	70221315	+	CCAR1	NM_018237	Intron_15..Intron_15
hsa-mir-346	chr10	88014431	88014525	-	87349291	88116230	-	GRID1	NM_017551	Intron_14..Intron_14
hsa-mir-107	chr10	91342484	91342564	-	91332728	91393627	-	PANK1	NM_138316	Intron_2..Intron_2
hsa-mir-107	chr10	91342484	91342564	-	91332728	91393627	-	PANK1	NM_148978	Intron_2..Intron_2
hsa-mir-107	chr10	91342484	91342564	-	91332728	91395195	-	PANK1	NM_148977	Intron_2..Intron_2
hsa-mir-1287	chr10	100144965	100145054	-	100133312	100164968	-	PYROXD2	NM_032709	Exon_9..Intron_9
hsa-mir-608	chr10	102724732	102724831	+	102722275	102735362	+	SEMA4G	NM_017893	Intron_3..Intron_3
hsa-mir-1307	chr10	105144000	105144148	-	105138803	105146213	-	USMG5	NM_032747	Exon_4..Intron_4
hsa-mir-936	chr10	105797837	105797934	-	105781035	105835628	-	COL17A1	NM_000494	Exon_27..Intron_27
hsa-mir-609	chr10	105968537	105968631	-	105879635	105982110	-	C10orf79	NM_025145	Intron_35..Intron_35
hsa-mir-548e	chr10	112738674	112738761	+	112669290	112763414	+	SHOC2	NM_007373	Intron_3..Intron_3
hsa-mir-2110	chr10	115923854	115923928	-	115871963	115924354	-	C10orf118	NM_018017	NA..NA
hsa-mir-675	chr11	1974565	1974637	-	1972981	1975641	-	H19	NR_002196	NA..NA
hsa-mir-483	chr11	2111940	2112015	-	2106922	2127409	-	IGF2	NM_001007139	Intron_2..Intron_2
hsa-mir-483	chr11	2111940	2112015	-	2106922	2116780	-	IGF2	NM_000612	Intron_2..Intron_2
hsa-mir-483	chr11	2111940	2112015	-	2106922	2118917	-	IGF2	NM_001127598	Intron_2..Intron_2
hsa-mir-483	chr11	2111940	2112015	-	2106925	2139015	-	INS-IGF2	NR_003512	Intron_2..Intron_2
hsa-mir-610	chr11	28034938	28035033	+	27998738	28086322	-	KIF18A	NM_031217	Intron_4..Intron_4
hsa-mir-611	chr11	61316543	61316609	-	61313177	61316661	-	C11orf10	NM_014206	Intron_3..NA
hsa-mir-1908	chr11	61339209	61339288	-	61323678	61341105	-	FADS1	NM_013402	Intron_11..Intron_11
hsa-mir-1237	chr11	63892650	63892751	+	63883200	63896263	+	RPS6KA4	NM_003942	Intron_11..Exon_12
hsa-mir-1237	chr11	63892650	63892751	+	63883200	63896263	+	RPS6KA4	NM_001006944	Intron_11..Exon_12
hsa-mir-548k	chr11	69807709	69807824	+	69794470	69908150	+	PPFIA1	NM_003626	Intron_2..Intron_2
hsa-mir-548k	chr11	69807709	69807824	+	69794470	69902146	+	PPFIA1	NM_177423	Intron_2..Intron_2
hsa-mir-139	chr11	72003755	72003822	-	71964833	72031152	-	PDE2A	NM_001143839	Intron_29..Intron_29
hsa-mir-139	chr11	72003755	72003822	-	71964833	72031135	-	PDE2A	NR_026572	Intron_29..Intron_29
hsa-mir-139	chr11	72003755	72003822	-	71964833	72063142	-	PDE2A	NM_002599	Intron_29..Intron_29
hsa-mir-139	chr11	72003755	72003822	-	71964833	72057756	-	PDE2A	NM_001146209	Intron_29..Intron_29
hsa-mir-326	chr11	74723784	74723878	-	74654129	74740521	-	ARRB1	NM_004041	Intron_15..Intron_15
hsa-mir-326	chr11	74723784	74723878	-	74654129	74740521	-	ARRB1	NM_020251	Intron_14..Intron_14
hsa-mir-708	chr11	78790714	78790801	-	78041975	78829343	-	ODZ4	NM_001098816	Intron_33..Intron_33
hsa-mir-548l	chr11	93839309	93839394	-	93790114	93866688	-	MRE11A	NM_005591	Intron_10..Intron_10
hsa-mir-548l	chr11	93839309	93839394	-	93790114	93866688	-	MRE11A	NM_005590	Intron_9..Intron_9
hsa-mir-125b-1	chr11	121475675	121475762	-	121465022	121578980	-	LOC399959	NR_024430	Intron_1..Intron_1
hsa-let-7a-2	chr11	121522440	121522511	-	121465022	121578980	-	LOC399959	NR_024430	Intron_1..Intron_1
hsa-mir-100	chr11	121528147	121528226	-	121465022	121578980	-	LOC399959	NR_024430	Intron_1..Intron_1
hsa-mir-613	chr12	12808850	12808944	+	12770117	12835666	+	APOLD1	NM_001130415	Intron_1..Intron_1
hsa-mir-920	chr12	24256622	24256696	+	23576497	24606647	-	SOX5	NM_152989	Intron_14..Intron_14
hsa-mir-1291	chr12	47334494	47334580	-	47333261	47362302	-	C12orf41	NM_017822	Intron_1..Intron_1
hsa-mir-1291	chr12	47334494	47334580	-	47334431	47334568	-	SNORA34	NR_002968	NA..NA
hsa-mir-1293	chr12	48914192	48914262	-	48855829	48963620	-	LIMA1	NM_016357	Intron_9..Intron_9
hsa-mir-1293	chr12	48914192	48914262	-	48855829	48963620	-	LIMA1	NM_001113546	Intron_9..Intron_9
hsa-mir-615	chr12	52714001	52714096	+	52696908	52736081	+	HOXC4	NM_014620	Intron_1..Intron_1
hsa-mir-615	chr12	52714001	52714096	+	52696908	52715411	+	HOXC5	NR_003084	Intron_1..Intron_1
hsa-mir-615	chr12	52714001	52714096	+	52713098	52715411	+	HOXC5	NM_018953	Intron_1..Intron_1
hsa-mir-148b	chr12	53017267	53017365	+	53005177	53031900	+	COPZ1	NM_016057	Intron_1..Intron_1
hsa-mir-1228	chr12	55874554	55874626	+	55808548	55893392	+	LRP1	NM_002332	Intron_49..Exon_50
hsa-mir-616	chr12	56199213	56199309	-	56196637	56200567	-	DDIT3	NM_004083	Intron_3..Intron_3
hsa-mir-26a-2	chr12	56504659	56504742	-	56499976	56527014	-	CTDSP2	NM_005730	Intron_3..Intron_3
hsa-mir-548c	chr12	63302556	63302652	+	63290559	63375459	+	RASSF3	NM_178169	Intron_1..Intron_1
hsa-mir-1279	chr12	67953204	67953265	-	67919583	67954405	+	CPSF6	NM_007007	NA..NA
hsa-mir-1252	chr12	78337168	78337232	+	77781903	78369918	+	SYT1	NM_001135805	Intron_10..Intron_10
hsa-mir-1252	chr12	78337168	78337232	+	77782579	78369918	+	SYT1	NM_005639	Intron_9..Intron_9
hsa-mir-1252	chr12	78337168	78337232	+	77963563	78369918	+	SYT1	NM_001135806	Intron_8..Intron_8
hsa-mir-617	chr12	79750443	79750539	-	79715301	79855825	-	LIN7A	NM_004664	Intron_2..Intron_2
hsa-mir-618	chr12	79853646	79853743	-	79715301	79855825	-	LIN7A	NM_004664	Intron_5..Intron_5
hsa-mir-1251	chr12	96409818	96409887	+	96382929	96451675	+	RMST	NR_024037	Intron_2..Intron_2
hsa-mir-619	chr12	107754813	107754911	-	107700595	107775488	-	SSH1	NM_018984	Intron_13..Intron_13
hsa-mir-619	chr12	107754813	107754911	-	107709824	107775488	-	SSH1	NM_001161330	Intron_12..Intron_12
hsa-mir-620	chr12	115070748	115070842	-	114880765	115199374	-	MED13L	NM_015335	Intron_29..Intron_29
hsa-mir-1178	chr12	118635822	118635912	-	118607980	118799475	-	CIT	NM_007174	Exon_15..Intron_15
hsa-mir-621	chr13	40282902	40282997	+	40261546	40284595	+	SLC25A15	NM_014252	NA..NA
hsa-mir-621	chr13	40282902	40282997	+	40269126	40393886	-	SUGT1L1	NR_003365	Intron_1..Intron_1
hsa-mir-16-1	chr13	49521110	49521198	-	49454688	49597678	-	DLEU2	NR_002612	Intron_7..Intron_7
hsa-mir-15a	chr13	49521256	49521338	-	49454688	49597678	-	DLEU2	NR_002612	Intron_7..Intron_7
hsa-mir-17	chr13	90800860	90800943	+	90798074	90804830	+	MIRHG1	NR_027349	Intron_3..Intron_3
hsa-mir-17	chr13	90800860	90800943	+	90798074	90804830	+	MIRHG1	NR_027350	NA..NA
hsa-mir-18a	chr13	90801006	90801076	+	90798074	90804830	+	MIRHG1	NR_027349	Intron_3..Intron_3
hsa-mir-18a	chr13	90801006	90801076	+	90798074	90804830	+	MIRHG1	NR_027350	NA..NA
hsa-mir-19a	chr13	90801146	90801227	+	90798074	90804830	+	MIRHG1	NR_027349	Intron_3..Intron_3
hsa-mir-19a	chr13	90801146	90801227	+	90798074	90804830	+	MIRHG1	NR_027350	NA..NA
hsa-mir-20a	chr13	90801320	90801390	+	90798074	90804830	+	MIRHG1	NR_027349	Intron_3..Intron_3
hsa-mir-20a	chr13	90801320	90801390	+	90798074	90804830	+	MIRHG1	NR_027350	NA..NA
hsa-mir-19b-1	chr13	90801447	90801533	+	90798074	90804830	+	MIRHG1	NR_027349	Intron_3..Intron_3
hsa-mir-19b-1	chr13	90801447	90801533	+	90798074	90804830	+	MIRHG1	NR_027350	NA..NA
hsa-mir-92a-1	chr13	90801569	90801646	+	90798074	90804830	+	MIRHG1	NR_027349	Intron_3..Intron_3
hsa-mir-92a-1	chr13	90801569	90801646	+	90798074	90804830	+	MIRHG1	NR_027350	NA..NA
hsa-mir-623	chr13	98806386	98806483	+	98650679	98836752	+	UBAC2	NM_001144072	Intron_7..Intron_7
hsa-mir-623	chr13	98806386	98806483	+	98651163	98836752	+	UBAC2	NM_177967	Intron_5..Intron_5
hsa-mir-623	chr13	98806386	98806483	+	98651163	98836752	+	UBAC2	NR_026644	Intron_7..Intron_7
hsa-mir-1267	chr13	106981520	106981597	-	106618880	107317461	-	FAM155A	NM_001080396	Intron_2..Intron_2
hsa-mir-1201	chr14	19864446	19864530	-	19864439	19864538	-	SNORD126	NR_003693	NA..NA
hsa-mir-1201	chr14	19864446	19864530	-	19849368	19867376	-	CCNB1IP1	NM_182851	Intron_5..Intron_5
hsa-mir-1201	chr14	19864446	19864530	-	19849368	19867379	-	CCNB1IP1	NM_182852	Intron_5..Intron_5
hsa-mir-1201	chr14	19864446	19864530	-	19849368	19871297	-	CCNB1IP1	NM_021178	Intron_4..Intron_4
hsa-mir-1201	chr14	19864446	19864530	-	19849368	19871297	-	CCNB1IP1	NM_182849	Intron_4..Intron_4
hsa-mir-208a	chr14	22927645	22927715	-	22921038	22947322	-	MYH6	NM_002471	Intron_10..Intron_10
hsa-mir-208b	chr14	22957036	22957112	-	22951786	22974710	-	MYH7	NM_000257	Intron_10..Intron_10
hsa-mir-624	chr14	30553603	30553699	-	30432755	30565358	-	STRN3	NM_001083893	Intron_17..Intron_17
hsa-mir-624	chr14	30553603	30553699	-	30432755	30565358	-	STRN3	NM_014574	Intron_15..Intron_15
hsa-mir-548h-1	chr14	63631495	63631596	-	63389435	63762922	+	SYNE2	NM_015180	Intron_61..Intron_61
hsa-mir-548h-1	chr14	63631495	63631596	-	63389435	63762922	+	SYNE2	NM_182914	Intron_61..Intron_61
hsa-mir-625	chr14	65007573	65007657	+	64947592	65279715	+	FUT8	NM_178156	Intron_1..Intron_1
hsa-mir-625	chr14	65007573	65007657	+	64947592	65279715	+	FUT8	NM_178155	Intron_2..Intron_2
hsa-mir-625	chr14	65007573	65007657	+	64949287	65279715	+	FUT8	NM_004480	Intron_2..Intron_2
hsa-mir-625	chr14	65007573	65007657	+	64949287	65279715	+	FUT8	NM_178154	Intron_2..Intron_2
hsa-mir-1260	chr14	76802314	76802386	+	76801586	76807408	-	NGB	NM_021257	Exon_1..Exon_1
hsa-mir-342	chr14	99645745	99645843	+	99601503	99680326	+	EVL	NM_016337	Intron_3..Intron_3
hsa-mir-770	chr14	100388480	100388577	+	100362197	100397113	+	MEG3	NR_003531	Intron_7..Intron_7
hsa-mir-770	chr14	100388480	100388577	+	100362197	100397113	+	MEG3	NR_003530	Intron_8..Intron_8
hsa-mir-770	chr14	100388480	100388577	+	100362215	100397121	+	MEG3	NR_002766	Intron_6..Intron_6
hsa-mir-431	chr14	100417097	100417210	+	100416744	100420937	-	RTL1	NM_001134888	NA..NA
hsa-mir-433	chr14	100417976	100418068	+	100416744	100420937	-	RTL1	NM_001134888	NA..NA
hsa-mir-127	chr14	100419069	100419165	+	100416744	100420937	-	RTL1	NM_001134888	NA..NA
hsa-mir-432	chr14	100420573	100420666	+	100416744	100420937	-	RTL1	NM_001134888	NA..NA
hsa-mir-136	chr14	100420792	100420873	+	100416744	100420937	-	RTL1	NM_001134888	NA..NA
hsa-mir-211	chr15	29144527	29144636	-	29080842	29181216	-	TRPM1	NM_002420	Intron_21..Intron_21
hsa-mir-1233	chr15	32461562	32461643	-	32458563	32469293	-	GOLGA8A	NM_181077	Intron_3..Exon_4
hsa-mir-1233	chr15	32461562	32461643	-	32458563	32516959	-	GOLGA8A	NR_027409	Intron_3..Exon_4
hsa-mir-1233	chr15	32607783	32607864	-	32604777	32615514	-	GOLGA8B	NM_001023567	Intron_3..Exon_4
hsa-mir-1233	chr15	32607783	32607864	-	32604777	32663063	-	GOLGA8B	NR_027410	Intron_3..Exon_4
hsa-mir-626	chr15	39771075	39771168	+	39739901	39849433	+	MGA	NM_001080541	Intron_2..Intron_2
hsa-mir-627	chr15	40279060	40279156	-	40238190	40287794	-	VPS39	NM_015289	Intron_23..Intron_23
hsa-mir-1282	chr15	41873149	41873249	-	41871768	41875579	+	SERF2	NM_001018108	Intron_2..NA
hsa-mir-147b	chr15	43512540	43512619	+	43510054	43512939	+	C15orf48	NM_032413	NA..NA
hsa-mir-147b	chr15	43512540	43512619	+	43510054	43512939	+	C15orf48	NM_197955	NA..NA
hsa-mir-1266	chr15	50356606	50356689	-	50271811	50375262	-	MYO5C	NM_018728	Intron_37..Intron_37
hsa-mir-628	chr15	53452430	53452524	-	53434729	53487834	-	CCPG1	NM_004748	Intron_3..Intron_3
hsa-mir-628	chr15	53452430	53452524	-	53434729	53487866	-	CCPG1	NM_020739	Intron_3..Intron_3
hsa-mir-190	chr15	60903209	60903293	+	60726801	60923882	+	TLN2	NM_015059	Intron_51..Intron_51
hsa-mir-1272	chr15	62841639	62841767	-	62819147	62854823	-	RBPMS2	NM_194272	Intron_7..Intron_7
hsa-mir-629	chr15	68158765	68158861	-	68127596	68177310	-	TLE3	NM_001105192	Intron_16..Intron_16
hsa-mir-629	chr15	68158765	68158861	-	68127596	68177310	-	TLE3	NM_020908	Intron_16..Intron_16
hsa-mir-629	chr15	68158765	68158861	-	68127596	68177310	-	TLE3	NM_005078	Intron_16..Intron_16
hsa-mir-631	chr15	73433005	73433079	-	73426383	73434639	+	NEIL1	NM_024608	Intron_5..Intron_5
hsa-mir-549	chr15	78921374	78921469	-	78858766	79031054	+	KIAA1199	NM_018689	Intron_1..Intron_1
hsa-mir-1276	chr15	84114731	84114813	-	84103562	84139193	-	KLHL25	NM_022480	Intron_2..Intron_2
hsa-mir-1469	chr15	94677494	94677540	+	94675114	94684494	+	NR2F2	NM_021005	Intron_1..Intron_1
hsa-mir-1469	chr15	94677494	94677540	+	94676797	94684494	+	NR2F2	NM_001145156	Intron_1..Intron_1
hsa-mir-1469	chr15	94677494	94677540	+	94670160	94684494	+	NR2F2	NM_001145155	Intron_1..Intron_1
hsa-mir-662	chr16	760184	760278	+	759428	772927	-	MSLNL	NM_001025190	Exon_2..Exon_2
hsa-mir-1225	chr16	2080197	2080286	-	2078711	2125900	-	PKD1	NM_000296	Intron_1..Exon_2
hsa-mir-1225	chr16	2080197	2080286	-	2078711	2125900	-	PKD1	NM_001009944	Intron_1..Exon_2
hsa-mir-1972	chr16	15011679	15011755	-	14976333	15039053	+	PDXDC1	NM_015027	Intron_8..Intron_8
hsa-mir-484	chr16	15644652	15644730	+	15644624	15727707	+	NDE1	NM_001143979	Exon_1..Exon_1
hsa-mir-328	chr16	65793725	65793799	-	65790528	65795428	+	ELMO3	NM_024712	Intron_13..Intron_13
hsa-mir-1538	chr16	68157212	68157272	-	68156497	68296054	+	NFAT5	NM_173214	Exon_1..Exon_1
hsa-mir-1538	chr16	68157212	68157272	-	68156497	68296054	+	NFAT5	NM_138713	Exon_1..Exon_1
hsa-mir-1538	chr16	68157212	68157272	-	68156497	68296054	+	NFAT5	NM_138714	Exon_1..Exon_1
hsa-mir-1538	chr16	68157212	68157272	-	68156497	68296054	+	NFAT5	NM_006599	Exon_1..Exon_1
hsa-mir-1538	chr16	68157212	68157272	-	68156497	68296054	+	NFAT5	NM_001113178	Exon_1..Exon_1
hsa-mir-140	chr16	68524485	68524584	+	68516401	68533144	+	WWP2	NM_199424	Intron_6..Intron_6
hsa-mir-140	chr16	68524485	68524584	+	68353774	68533144	+	WWP2	NM_007014	Intron_17..Intron_17
hsa-mir-1972	chr16	68621750	68621826	+	68567702	68657352	-	PDXDC2	NR_003610	Intron_18..Intron_18
hsa-mir-1910	chr16	84332728	84332807	-	84298624	84342190	-	C16orf74	NM_206967	Intron_3..Intron_3
hsa-mir-22	chr17	1563947	1564031	-	1561552	1566254	-	C17orf91	NM_032895	Exon_2..Exon_2
hsa-mir-22	chr17	1563947	1564031	-	1561552	1566255	-	C17orf91	NM_001001870	Exon_2..Exon_2
hsa-mir-324	chr17	7067340	7067422	-	7063876	7069309	+	ACADVL	NM_000018	Intron_11..Intron_11
hsa-mir-324	chr17	7067340	7067422	-	7063876	7069309	+	ACADVL	NM_001033859	Intron_10..Intron_10
hsa-mir-744	chr17	11925941	11926038	+	11864859	11987776	+	MAP2K4	NM_003010	Intron_3..Intron_3
hsa-mir-548h-3	chr17	13387571	13387688	-	13339730	13445969	-	HS3ST3A1	NM_006042	Intron_1..Intron_1
hsa-mir-1288	chr17	16126053	16126127	+	16061233	16170298	+	PIGL	NM_004278	Intron_2..Intron_2
hsa-mir-33b	chr17	17657875	17657970	-	17656110	17681050	-	SREBF1	NM_004176	Intron_3..Intron_3
hsa-mir-33b	chr17	17657875	17657970	-	17656110	17681050	-	SREBF1	NM_001005291	Intron_3..Intron_3
hsa-mir-1180	chr17	19188412	19188480	-	19187075	19206639	-	B9D1	NM_015681	Intron_2..Intron_2
hsa-mir-423	chr17	25468223	25468316	+	25467959	25537612	+	CCDC55	NM_032141	Intron_1..Intron_1
hsa-mir-152	chr17	43469526	43469612	-	43458531	43470151	-	COPZ2	NM_016429	Intron_8..Intron_8
hsa-mir-1203	chr17	43588788	43588872	-	43565800	43862593	-	SKAP1	NM_001075099	Intron_2..Intron_2
hsa-mir-1203	chr17	43588788	43588872	-	43565800	43862593	-	SKAP1	NM_003726	Intron_2..Intron_2
hsa-mir-454	chr17	54569901	54570015	-	54542089	54587582	-	FAM33A	NM_182620	Intron_3..Intron_3
hsa-mir-454	chr17	54569901	54570015	-	54542089	54587582	-	FAM33A	NM_001100595	Intron_2..Intron_2
hsa-mir-301a	chr17	54583279	54583364	-	54542089	54587582	-	FAM33A	NM_182620	Intron_3..Intron_3
hsa-mir-301a	chr17	54583279	54583364	-	54542089	54587582	-	FAM33A	NM_001100595	Intron_2..Intron_2
hsa-mir-634	chr17	62213652	62213748	+	61729387	62237324	+	PRKCA	NM_002737	Intron_15..Intron_15
hsa-mir-548d-2	chr17	62898067	62898163	-	62804385	63120109	+	PITPNC1	NM_012417	Intron_1..Intron_1
hsa-mir-548d-2	chr17	62898067	62898163	-	62804385	63120109	+	PITPNC1	NM_181671	Intron_1..Intron_1
hsa-mir-635	chr17	63932187	63932284	-	63929016	63965248	-	WIPI1	NM_017983	Intron_1..Intron_1
hsa-mir-636	chr17	72244127	72244225	-	72241791	72245007	-	SFRS2	NM_003016	Exon_1..Intron_1
hsa-mir-657	chr17	76713671	76713768	-	76705690	76754467	-	AATK	NM_001080395	Intron_7..Intron_7
hsa-mir-338	chr17	76714278	76714344	-	76705690	76754467	-	AATK	NM_001080395	Intron_7..Intron_7
hsa-mir-1250	chr17	76721591	76721703	-	76705690	76754467	-	AATK	NM_001080395	Intron_12..Intron_12
hsa-mir-320c-1	chr18	17517469	17517556	+	17484855	17538764	-	ABHD3	NM_138340	Intron_5..Intron_5
hsa-mir-133a-1	chr18	17659657	17659744	-	17575542	17704910	+	MIB1	NM_020774	Intron_12..Intron_12
hsa-mir-1-2	chr18	17662963	17663047	-	17575542	17704910	+	MIB1	NM_020774	Intron_12..Intron_12
hsa-mir-320c-2	chr18	20155648	20155697	+	19996008	20231788	-	OSBPL1A	NM_080597	Intron_21..Intron_21
hsa-mir-924	chr18	35456085	35456137	-	35040885	35585957	-	LOC647946	NR_024391	Intron_2..Intron_2
hsa-mir-1909	chr19	1767158	1767237	-	1766244	1799452	-	REXO1	NM_020695	Intron_1..Exon_2
hsa-mir-1227	chr19	2185061	2185148	-	2184154	2187328	-	PLEKHJ1	NM_018049	Intron_2..Exon_3
hsa-mir-637	chr19	3912412	3912510	-	3909451	3920826	-	DAPK3	NM_001348	Intron_3..Intron_3
hsa-mir-7-3	chr19	4721682	4721791	+	4720116	4723567	+	C19orf30	NR_027148	Intron_2..Intron_2
hsa-mir-220b	chr19	6446959	6447045	+	6445329	6453330	-	TUBB4	NM_006087	Exon_1..Exon_1
hsa-mir-1181	chr19	10375134	10375214	-	10362808	10375271	-	CDC37	NM_007065	NA..NA
hsa-mir-1238	chr19	10523798	10523880	+	10515646	10525094	+	ATG4D	NM_032885	Intron_8..Exon_9
hsa-mir-638	chr19	10690080	10690179	+	10689754	10803579	+	DNM2	NM_001005360	Intron_1..Intron_1
hsa-mir-638	chr19	10690080	10690179	+	10689754	10803579	+	DNM2	NM_004945	Intron_1..Intron_1
hsa-mir-638	chr19	10690080	10690179	+	10689754	10803579	+	DNM2	NM_001005362	Intron_1..Intron_1
hsa-mir-638	chr19	10690080	10690179	+	10689754	10803579	+	DNM2	NM_001005361	Intron_1..Intron_1
hsa-mir-199a-1	chr19	10789102	10789172	-	10689754	10803579	+	DNM2	NM_001005360	Intron_15..Intron_15
hsa-mir-199a-1	chr19	10789102	10789172	-	10689754	10803579	+	DNM2	NM_004945	Intron_14..Intron_14
hsa-mir-199a-1	chr19	10789102	10789172	-	10689754	10803579	+	DNM2	NM_001005362	Intron_14..Intron_14
hsa-mir-199a-1	chr19	10789102	10789172	-	10689754	10803579	+	DNM2	NM_001005361	Intron_15..Intron_15
hsa-mir-1470	chr19	15421359	15421419	+	15393317	15421762	-	WIZ	NM_021241	Intron_7..Intron_7
hsa-mir-640	chr19	19406872	19406967	+	19357641	19480741	+	GATAD2A	NM_017660	Intron_1..Intron_1
hsa-mir-1270	chr19	20371080	20371162	-	20366359	20399602	-	ZNF826	NM_001039884	Intron_1..Intron_1
hsa-mir-641	chr19	45480290	45480388	-	45428063	45483105	-	AKT2	NM_001626	Intron_13..Intron_13
hsa-mir-330	chr19	50834092	50834185	-	50804497	50834509	-	EML2	NM_012155	Intron_18..Intron_18
hsa-mir-642	chr19	50870026	50870122	+	50863341	50877557	+	GIPR	NM_000164	Intron_7..Intron_7
hsa-mir-220c	chr19	53755341	53755423	-	53747240	53794496	+	SULT2B1	NM_177973	Intron_1..Intron_1
hsa-mir-643	chr19	57476862	57476958	+	57464635	57487788	+	ZNF766	NM_001010851	Intron_1..Intron_1
hsa-mir-935	chr19	59177373	59177463	+	59158105	59177951	+	CACNG8	NM_031895	NA..NA
hsa-mir-1301	chr2	25405013	25405094	-	25309348	25418278	-	DNMT3A	NM_022552	Intron_22..Intron_22
hsa-mir-1301	chr2	25405013	25405094	-	25309348	25418963	-	DNMT3A	NM_175629	Intron_22..Intron_22
hsa-mir-1301	chr2	25405013	25405094	-	25357824	25418963	-	DNMT3A	NM_175630	Intron_3..Intron_3
hsa-mir-558	chr2	32610724	32610817	+	32435599	32697469	+	BIRC6	NM_016252	Intron_61..Intron_61
hsa-mir-559	chr2	47458318	47458413	+	47449790	47467669	+	EPCAM	NM_002354	Intron_5..Intron_5
hsa-mir-663b	chr2	132731009	132731123	-	132621638	132732012	-	NCRNA00164	NR_027020	Intron_4..Intron_4
hsa-mir-128-1	chr2	136139437	136139518	+	136005552	136199309	+	R3HDM1	NM_015361	Intron_18..Intron_18
hsa-mir-1978	chr2	149355835	149355887	-	149349288	149591519	+	KIF5C	NM_004522	Intron_1..Intron_1
hsa-mir-933	chr2	175740607	175740683	-	175647251	175741143	-	ATF2	NM_001880	Intron_13..Intron_13
hsa-mir-1258	chr2	180433808	180433880	-	180014955	180434477	-	ZNF385B	NM_152520	Intron_9..Intron_9
hsa-mir-561	chr2	188870464	188870560	+	188865634	189168897	+	GULP1	NM_016315	Intron_1..Intron_1
hsa-mir-1245	chr2	189551063	189551132	+	189547343	189585717	+	COL3A1	NM_000090	Intron_1..Intron_1
hsa-mir-548f-2	chr2	212999232	212999329	-	211948686	213111597	-	ERBB4	NM_005235	Intron_27..Intron_27
hsa-mir-548f-2	chr2	212999232	212999329	-	211948686	213111597	-	ERBB4	NM_001042599	Intron_26..Intron_26
hsa-mir-26b	chr2	218975613	218975689	+	218972721	218978908	+	CTDSP1	NM_021198	Intron_4..Intron_4
hsa-mir-26b	chr2	218975613	218975689	+	218973057	218977392	+	CTDSP1	NM_182642	Intron_4..Intron_4
hsa-mir-153-1	chr2	219867077	219867166	-	219862588	219882387	-	PTPRN	NM_002846	Intron_4..Intron_4
hsa-mir-1244	chr2	232286268	232286352	+	232281478	232286494	+	PTMA	NM_001099285	NA..NA
hsa-mir-1244	chr2	232286268	232286352	+	232281478	232286494	+	PTMA	NM_002823	NA..NA
hsa-mir-562	chr2	232745607	232745701	+	232534536	232910152	+	DIS3L2	NM_152383	Intron_9..Intron_9
hsa-mir-149	chr2	241044091	241044179	+	241023787	241056168	+	GPC1	NM_002081	Intron_1..Intron_1
hsa-mir-149	chr2	241044091	241044179	+	241037508	241044790	-	PP14571	NR_024014	Intron_1..Intron_1
hsa-mir-1292	chr20	2581423	2581488	+	2581253	2587038	+	NOP56	NR_027700	Intron_1..Exon_2
hsa-mir-1292	chr20	2581423	2581488	+	2581253	2587039	+	NOP56	NM_006392	Intron_1..Exon_2
hsa-mir-103-2	chr20	3846141	3846218	+	3818462	3852502	+	PANK2	NM_153640	Intron_5..Intron_5
hsa-mir-103-2	chr20	3846141	3846218	+	3817485	3852502	+	PANK2	NM_024960	Intron_5..Intron_5
hsa-mir-103-2	chr20	3846141	3846218	+	3817741	3852502	+	PANK2	NM_153638	Intron_5..Intron_5
hsa-mir-103-2-as	chr20	3846149	3846210	-	3818462	3852502	+	PANK2	NM_153640	Intron_5..Intron_5
hsa-mir-103-2-as	chr20	3846149	3846210	-	3817485	3852502	+	PANK2	NM_024960	Intron_5..Intron_5
hsa-mir-103-2-as	chr20	3846149	3846210	-	3817741	3852502	+	PANK2	NM_153638	Intron_5..Intron_5
hsa-mir-1825	chr20	30289259	30289311	+	30259356	30290128	+	POFUT1	NM_015352	NA..NA
hsa-mir-644	chr20	32517791	32517884	+	32414722	32562858	+	ITCH	NM_031483	Intron_14..Intron_14
hsa-mir-499	chr20	33041840	33041961	+	33026866	33053897	+	MYH7B	NM_020884	Intron_20..Intron_20
hsa-mir-1259	chr20	47330254	47330364	+	47328583	47339197	+	C20orf199	NR_003604	Intron_2..Intron_2
hsa-mir-1259	chr20	47330254	47330364	+	47328448	47339202	+	C20orf199	NR_003606	Intron_2..Intron_2
hsa-mir-1259	chr20	47330254	47330364	+	47328121	47339202	+	C20orf199	NR_003605	Intron_2..Intron_2
hsa-mir-1302-5	chr20	48664580	48664729	-	48636052	48686833	-	FAM65C	NM_080829	Intron_18..Intron_18
hsa-mir-1-1	chr20	60561958	60562028	+	60558104	60578416	+	C20orf166	NM_178463	Intron_2..Intron_2
hsa-mir-133a-2	chr20	60572564	60572665	+	60558104	60578416	+	C20orf166	NM_178463	Intron_2..Exon_3
hsa-mir-941-1	chr20	62021238	62021326	+	61996961	62035839	+	DNAJC5	NM_025219	Intron_1..Intron_1
hsa-mir-941-2	chr20	62021545	62021633	+	61996961	62035839	+	DNAJC5	NM_025219	Intron_1..Intron_1
hsa-mir-941-3	chr20	62021657	62021745	+	61996961	62035839	+	DNAJC5	NM_025219	Intron_1..Intron_1
hsa-mir-1914	chr20	62043262	62043341	-	62041631	62058212	-	UCKL1	NM_017859	Intron_7..Intron_7
hsa-mir-647	chr20	62044428	62044523	-	62041631	62058212	-	UCKL1	NM_017859	Intron_7..Intron_7
hsa-mir-99a	chr21	16833280	16833360	+	16488569	16903965	+	C21orf34	NR_027791	Intron_5..Intron_5
hsa-mir-99a	chr21	16833280	16833360	+	16364712	16903965	+	C21orf34	NR_027790	Intron_6..Intron_6
hsa-let-7c	chr21	16834019	16834102	+	16488569	16903965	+	C21orf34	NR_027791	Intron_5..Intron_5
hsa-let-7c	chr21	16834019	16834102	+	16364712	16903965	+	C21orf34	NR_027790	Intron_6..Intron_6
hsa-mir-125b-2	chr21	16884428	16884516	+	16488569	16903965	+	C21orf34	NR_027791	Intron_5..Intron_5
hsa-mir-125b-2	chr21	16884428	16884516	+	16364712	16903965	+	C21orf34	NR_027790	Intron_6..Intron_6
hsa-mir-155	chr21	25868163	25868227	+	25856327	25869344	+	MIRHG2	NR_001458	NA..NA
hsa-mir-648	chr22	16843634	16843727	-	16697100	16887325	-	MICAL3	NM_001122731	Intron_20..Intron_20
hsa-mir-648	chr22	16843634	16843727	-	16650417	16887325	-	MICAL3	NM_015241	Intron_31..Intron_31
hsa-mir-648	chr22	16843634	16843727	-	16722921	16887325	-	MICAL3	NM_001136004	Intron_22..Intron_22
hsa-mir-185	chr22	18400662	18400743	+	18388630	18433447	+	C22orf25	NM_152906	Intron_1..Intron_1
hsa-mir-1306	chr22	18453581	18453665	+	18447833	18479400	+	DGCR8	NM_022720	Exon_2..Exon_2
hsa-mir-1286	chr22	18616657	18616734	-	18608937	18635816	-	RTN4R	NM_023004	Intron_1..Intron_1
hsa-mir-548j	chr22	25281178	25281289	-	25251713	25291370	-	TPST2	NM_001008566	Intron_6..Intron_6
hsa-mir-548j	chr22	25281178	25281289	-	25251713	25316089	-	TPST2	NM_003595	Intron_6..Intron_6
hsa-mir-658	chr22	36570225	36570324	-	36556807	36570249	-	ANKRD54	NM_138797	NA..NA
hsa-mir-33a	chr22	40626894	40626962	+	40559051	40632321	+	SREBF2	NM_004599	Intron_16..Intron_16
hsa-mir-1249	chr22	43975499	43975564	-	43966786	43987011	-	C22orf9	NM_015264	Intron_3..Intron_3
hsa-mir-1249	chr22	43975499	43975564	-	43966786	44015314	-	C22orf9	NM_001009880	Intron_3..Intron_3
hsa-let-7a-3	chr22	44887293	44887366	+	44860540	44888470	+	LOC400931	NR_027033	NA..NA
hsa-let-7b	chr22	44888230	44888312	+	44860540	44888470	+	LOC400931	NR_027033	NA..NA
hsa-mir-885	chr3	10411173	10411246	-	10340706	10522268	-	ATP2B2	NM_001683	Intron_15..Intron_15
hsa-mir-885	chr3	10411173	10411246	-	10340706	10522268	-	ATP2B2	NM_001001331	Intron_18..Intron_18
hsa-mir-128-2	chr3	35760972	35761055	+	35658852	35810992	+	ARPP-21	NM_016300	Intron_18..Intron_18
hsa-mir-26a-1	chr3	37985899	37985975	+	37878672	38000964	+	CTDSPL	NM_005808	Intron_4..Intron_4
hsa-mir-26a-1	chr3	37985899	37985975	+	37878672	38000964	+	CTDSPL	NM_001008392	Intron_5..Intron_5
hsa-mir-1226	chr3	47866049	47866123	+	47819402	47866689	+	DHX30	NM_014966	Intron_21..Exon_22
hsa-mir-1226	chr3	47866049	47866123	+	47819402	47866689	+	DHX30	NM_138615	Intron_20..Exon_21
hsa-mir-425	chr3	49032585	49032671	-	49027438	49033471	-	DALRD3	NM_018114	Intron_11..Intron_11
hsa-mir-191	chr3	49033055	49033146	-	49027438	49033471	-	DALRD3	NM_018114	Intron_11..Intron_11
hsa-mir-191	chr3	49033055	49033146	-	49032911	49035930	+	NDUFAF3	NM_199074	Intron_1..Intron_1
hsa-mir-566	chr3	50185763	50185856	+	50167851	50201512	+	SEMA3F	NM_004186	Intron_2..Intron_2
hsa-let-7g	chr3	52277334	52277417	-	52263477	52287699	-	WDR82	NM_025222	Intron_7..Intron_7
hsa-mir-135a-1	chr3	52303275	52303364	-	52296875	52304311	+	GLYCTK	NM_145262	NA..NA
hsa-mir-135a-1	chr3	52303275	52303364	-	52296875	52304311	+	GLYCTK	NR_026699	NA..NA
hsa-mir-135a-1	chr3	52303275	52303364	-	52296875	52304311	+	GLYCTK	NR_026702	NA..NA
hsa-mir-135a-1	chr3	52303275	52303364	-	52296875	52304311	+	GLYCTK	NR_026701	NA..NA
hsa-mir-135a-1	chr3	52303275	52303364	-	52296875	52304311	+	GLYCTK	NR_026700	NA..NA
hsa-mir-1284	chr3	71673811	71673930	-	71087425	71715830	-	FOXP1	NM_032682	Intron_19..Intron_19
hsa-mir-1284	chr3	71673811	71673930	-	71329723	71715830	-	FOXP1	NM_001012505	Intron_5..Intron_5
hsa-mir-567	chr3	113314338	113314435	+	113287871	113319734	+	C3orf52	NM_024616	Intron_4..Intron_4
hsa-mir-198	chr3	121597205	121597266	-	121595751	121652608	-	FSTL1	NM_007085	Exon_1..Exon_1
hsa-mir-1280	chr3	129563698	129563791	+	129355002	129610179	+	EEFSEC	NM_021937	Intron_6..Intron_6
hsa-mir-15b	chr3	161605070	161605167	+	161601040	161635435	+	SMC4	NM_005496	Intron_4..Intron_4
hsa-mir-15b	chr3	161605070	161605167	+	161600123	161635435	+	SMC4	NM_001002800	Intron_5..Intron_5
hsa-mir-16-2	chr3	161605227	161605307	+	161601040	161635435	+	SMC4	NM_005496	Intron_4..Intron_4
hsa-mir-16-2	chr3	161605227	161605307	+	161600123	161635435	+	SMC4	NM_001002800	Intron_5..Intron_5
hsa-mir-569	chr3	172307147	172307242	-	172262985	172660891	-	TNIK	NM_001161560	Intron_12..Intron_12
hsa-mir-569	chr3	172307147	172307242	-	172262985	172660891	-	TNIK	NM_001161561	Intron_12..Intron_12
hsa-mir-569	chr3	172307147	172307242	-	172262985	172660891	-	TNIK	NM_001161562	Intron_12..Intron_12
hsa-mir-569	chr3	172307147	172307242	-	172262985	172660891	-	TNIK	NM_001161563	Intron_12..Intron_12
hsa-mir-569	chr3	172307147	172307242	-	172262985	172660891	-	TNIK	NM_001161564	Intron_12..Intron_12
hsa-mir-569	chr3	172307147	172307242	-	172262985	172660891	-	TNIK	NM_001161565	Intron_12..Intron_12
hsa-mir-569	chr3	172307147	172307242	-	172262985	172660891	-	TNIK	NM_001161566	Intron_12..Intron_12
hsa-mir-569	chr3	172307147	172307242	-	172262985	172660891	-	TNIK	NM_015028	Intron_12..Intron_12
hsa-mir-1224	chr3	185441887	185441971	+	185431010	185442810	+	VWA5B2	NM_138345	Intron_18..NA
hsa-mir-1248	chr3	187987155	187987260	+	187984054	187990379	+	EIF4A2	NM_001967	Intron_7..Intron_7
hsa-mir-28	chr3	189889263	189889348	+	189413414	190080135	+	LPP	NM_005578	Intron_6..Intron_6
hsa-mir-944	chr3	191030405	191030492	+	190990142	191081978	+	TP63	NM_001114982	Intron_2..Intron_2
hsa-mir-944	chr3	191030405	191030492	+	190831909	191081978	+	TP63	NM_001114979	Intron_4..Intron_4
hsa-mir-944	chr3	191030405	191030492	+	190831909	191097762	+	TP63	NM_003722	Intron_4..Intron_4
hsa-mir-944	chr3	191030405	191030492	+	190990142	191097762	+	TP63	NM_001114981	Intron_2..Intron_2
hsa-mir-944	chr3	191030405	191030492	+	190990142	191097762	+	TP63	NM_001114980	Intron_2..Intron_2
hsa-mir-944	chr3	191030405	191030492	+	190831909	191097762	+	TP63	NM_001114978	Intron_4..Intron_4
hsa-mir-922	chr3	198885764	198885844	-	198882655	198948170	-	KIAA0226	NM_014687	Exon_1..Exon_1
hsa-mir-922	chr3	198885764	198885844	-	198882710	198960965	-	KIAA0226	NM_001145642	Exon_1..Exon_1
hsa-mir-571	chr4	333946	334041	+	321595	357691	+	ZNF141	NM_003441	Intron_3..Intron_3
hsa-mir-943	chr4	1957909	1958002	-	1954240	1980757	-	WHSC2	NM_005663	Exon_7..Intron_7
hsa-mir-95	chr4	8057928	8058008	-	8017936	8211459	-	ABLIM2	NM_001130083	Intron_5..Intron_5
hsa-mir-95	chr4	8057928	8058008	-	8017936	8211459	-	ABLIM2	NM_001130086	Intron_5..Intron_5
hsa-mir-95	chr4	8057928	8058008	-	8017936	8211459	-	ABLIM2	NM_001130084	Intron_5..Intron_5
hsa-mir-95	chr4	8057928	8058008	-	8017936	8211459	-	ABLIM2	NM_001130085	Intron_3..Intron_3
hsa-mir-95	chr4	8057928	8058008	-	8017936	8211459	-	ABLIM2	NM_032432	Intron_3..Intron_3
hsa-mir-95	chr4	8057928	8058008	-	8017936	8211459	-	ABLIM2	NM_001130087	Intron_3..Intron_3
hsa-mir-218-1	chr4	20138996	20139105	+	19864332	20229886	+	SLIT2	NM_004787	Intron_15..Intron_15
hsa-mir-574	chr4	38546048	38546143	+	38545831	38621821	+	FAM114A1	NM_138389	Intron_1..Intron_1
hsa-mir-575	chr4	83893514	83893607	-	83800063	83939034	-	SCD5	NM_024906	Intron_3..Intron_3
hsa-mir-575	chr4	83893514	83893607	-	83769713	83939034	-	SCD5	NM_001037582	Intron_4..Intron_4
hsa-mir-1255a	chr4	102470482	102470594	-	102163609	102487651	-	PPP3CA	NM_000944	Intron_13..Intron_13
hsa-mir-1255a	chr4	102470482	102470594	-	102163609	102487651	-	PPP3CA	NM_001130692	Intron_11..Intron_11
hsa-mir-1255a	chr4	102470482	102470594	-	102163609	102487651	-	PPP3CA	NM_001130691	Intron_12..Intron_12
hsa-mir-576	chr4	110629303	110629400	+	110574419	110681064	+	SEC24B	NM_001042734	Intron_3..Intron_3
hsa-mir-576	chr4	110629303	110629400	+	110574419	110681064	+	SEC24B	NM_006323	Intron_4..Intron_4
hsa-mir-367	chr4	113788479	113788546	-	113778060	113798191	+	LARP7	NM_015454	Intron_8..Intron_8
hsa-mir-367	chr4	113788479	113788546	-	113777568	113798191	+	LARP7	NM_016648	Intron_8..Intron_8
hsa-mir-302d	chr4	113788609	113788676	-	113778060	113798191	+	LARP7	NM_015454	Intron_8..Intron_8
hsa-mir-302d	chr4	113788609	113788676	-	113777568	113798191	+	LARP7	NM_016648	Intron_8..Intron_8
hsa-mir-302a	chr4	113788788	113788856	-	113778060	113798191	+	LARP7	NM_015454	Intron_8..Intron_8
hsa-mir-302a	chr4	113788788	113788856	-	113777568	113798191	+	LARP7	NM_016648	Intron_8..Intron_8
hsa-mir-302c	chr4	113788968	113789035	-	113778060	113798191	+	LARP7	NM_015454	Intron_8..Intron_8
hsa-mir-302c	chr4	113788968	113789035	-	113777568	113798191	+	LARP7	NM_016648	Intron_8..Intron_8
hsa-mir-302b	chr4	113789090	113789162	-	113778060	113798191	+	LARP7	NM_015454	Intron_8..Intron_8
hsa-mir-302b	chr4	113789090	113789162	-	113777568	113798191	+	LARP7	NM_016648	Intron_8..Intron_8
hsa-mir-1243	chr4	114247468	114247560	+	114190233	114524345	+	ANK2	NM_020977	Intron_1..Intron_1
hsa-mir-1243	chr4	114247468	114247560	+	114190233	114524345	+	ANK2	NM_001148	Intron_1..Intron_1
hsa-mir-1243	chr4	114247468	114247560	+	113958687	114524345	+	ANK2	NM_001127493	Intron_2..Intron_2
hsa-mir-577	chr4	115797364	115797459	+	115762971	115817651	+	UGT8	NM_003360	Intron_1..Intron_1
hsa-mir-577	chr4	115797364	115797459	+	115739059	115817651	+	UGT8	NM_001128174	Intron_2..Intron_2
hsa-mir-578	chr4	166526844	166526939	+	166519546	166638932	+	CPE	NM_001873	Intron_1..Intron_1
hsa-mir-1979	chr4	166541264	166541339	-	166519546	166638932	+	CPE	NM_001873	Intron_1..Intron_1
hsa-mir-887	chr5	15988291	15988369	+	15553304	15992900	+	FBXL7	NM_012304	Intron_3..Intron_3
hsa-mir-579	chr5	32430241	32430338	-	32390212	32480601	-	ZFR	NM_016107	Intron_9..Intron_9
hsa-mir-580	chr5	36183751	36183847	-	36139170	36187772	-	LMBRD2	NM_001007527	Intron_17..Intron_17
hsa-mir-1274a	chr5	41511491	41511561	+	41342804	41546487	-	PLCXD3	NM_001005473	Intron_2..Intron_2
hsa-mir-581	chr5	53283091	53283186	-	53216370	53642160	-	ARL15	NM_019087	Intron_1..Intron_1
hsa-mir-449a	chr5	54502117	54502207	-	54444579	54504760	-	CDC20B	NM_152623	Intron_10..Intron_10
hsa-mir-449a	chr5	54502117	54502207	-	54444579	54504760	-	CDC20B	NM_001145734	Intron_9..Intron_9
hsa-mir-449b	chr5	54502231	54502327	-	54444579	54504760	-	CDC20B	NM_152623	Intron_10..Intron_10
hsa-mir-449b	chr5	54502231	54502327	-	54444579	54504760	-	CDC20B	NM_001145734	Intron_9..Intron_9
hsa-mir-582	chr5	59035189	59035286	-	58300622	59225378	-	PDE4D	NM_001104631	Intron_14..Intron_14
hsa-mir-9-2	chr5	87998427	87998513	-	87872352	88016376	-	LOC645323	NR_015436	Intron_2..Intron_2
hsa-mir-9-2	chr5	87998427	87998513	-	87996019	88004902	-	LOC645323	NR_024384	Exon_1..Exon_1
hsa-mir-9-2	chr5	87998427	87998513	-	87996019	88010018	-	LOC645323	NR_024383	Exon_1..Exon_1
hsa-mir-1974	chr5	93930928	93930997	-	93512312	93980065	-	C5orf36	NM_001145678	Intron_19..Intron_19
hsa-mir-1974	chr5	93930928	93930997	-	93880673	93980065	-	C5orf36	NM_173665	Intron_3..Intron_3
hsa-mir-548p	chr5	100180085	100180168	-	100170538	100266886	-	ST8SIA4	NM_005668	Intron_1..Intron_1
hsa-mir-548f-3	chr5	109877429	109877515	-	109783710	110090280	-	FLJ43080	NM_001039763	Intron_2..Intron_2
hsa-mir-1244	chr5	118338180	118338264	+	118200473	118352139	-	DTWD2	NM_173666	Intron_5..Intron_5
hsa-mir-1289-2	chr5	132791187	132791297	-	132560050	132976122	-	FSTL4	NM_015082	Intron_13..Intron_13
hsa-mir-874	chr5	137011160	137011237	-	136981087	137099678	-	KLHL3	NM_017415	Intron_7..Intron_7
hsa-mir-584	chr5	148422069	148422165	-	148341905	148422930	-	SH3TC2	NM_024577	Intron_16..Intron_16
hsa-mir-143	chr5	148788674	148788779	+	148766632	148792592	+	LOC728264	NR_027180	NA..NA
hsa-mir-145	chr5	148790402	148790489	+	148766632	148792592	+	LOC728264	NR_027180	NA..NA
hsa-mir-378	chr5	149092581	149092646	+	149090056	149207462	+	PPARGC1B	NM_133263	Intron_1..Intron_1
hsa-mir-1294	chr5	153706859	153707000	+	153550487	153780003	+	GALNT10	NM_198321	Intron_4..Intron_4
hsa-mir-103-1	chr5	167920479	167920556	-	167915207	167939166	-	PANK3	NM_024594	Intron_2..Intron_2
hsa-mir-103-1-as	chr5	167920487	167920548	+	167915207	167939166	-	PANK3	NM_024594	Intron_2..Intron_2
hsa-mir-218-2	chr5	168127729	168127838	-	168025648	168660711	-	SLIT3	NM_003062	Intron_22..Intron_22
hsa-mir-585	chr5	168623183	168623276	-	168025648	168660711	-	SLIT3	NM_003062	Intron_35..Intron_35
hsa-mir-1271	chr5	175727555	175727640	+	175725107	175733109	+	ARL10	NM_173664	Intron_2..Intron_2
hsa-mir-1229	chr5	179157884	179157952	-	179157204	179162481	-	MGAT4B	NM_054013	Intron_2..Exon_3
hsa-mir-1229	chr5	179157884	179157952	-	179157204	179166558	-	MGAT4B	NM_014275	Intron_2..Exon_3
hsa-mir-340	chr5	179374909	179375003	-	179315079	179431715	-	RNF130	NM_018434	Intron_7..Intron_7
hsa-mir-877	chr6	30660088	30660173	+	30647148	30667288	+	ABCF1	NM_001025091	Intron_13..Exon_14
hsa-mir-877	chr6	30660088	30660173	+	30647148	30667288	+	ABCF1	NM_001090	Intron_12..Exon_13
hsa-mir-1236	chr6	32032595	32032696	-	32027842	32034843	-	RDBP	NM_002904	Intron_8..Exon_9
hsa-mir-586	chr6	45273389	45273485	-	44904447	45453648	-	SUPT3H	NM_181356	Intron_9..Intron_9
hsa-mir-586	chr6	45273389	45273485	-	44905427	45453553	-	SUPT3H	NM_003599	Intron_9..Intron_9
hsa-mir-548b	chr6	119431911	119432007	-	119322694	119441511	-	FAM184A	NM_024581	Intron_17..Intron_17
hsa-mir-548b	chr6	119431911	119432007	-	119322694	119512057	-	FAM184A	NM_001100411	Intron_16..Intron_16
hsa-mir-1913	chr6	166842832	166842911	-	166742843	167195761	-	RPS6KA2	NM_001006932	Intron_17..Intron_17
hsa-mir-1913	chr6	166842832	166842911	-	166742843	166960716	-	RPS6KA2	NM_021135	Intron_17..Intron_17
hsa-mir-339	chr7	1029095	1029188	-	1003148	1144419	-	C7orf50	NM_032350	Intron_3..Intron_3
hsa-mir-339	chr7	1029095	1029188	-	1003148	1144419	-	C7orf50	NM_001134396	Intron_3..Intron_3
hsa-mir-339	chr7	1029095	1029188	-	1003148	1144419	-	C7orf50	NM_001134395	Intron_3..Intron_3
hsa-mir-589	chr7	5501976	5502074	-	5481953	5519925	-	FBXL18	NM_024963	Intron_2..Intron_2
hsa-mir-1183	chr7	21477201	21477289	+	21434213	21520676	+	SP4	NM_003112	Intron_3..Intron_3
hsa-mir-550-1	chr7	30295935	30296031	+	30290447	30373833	+	ZNRF2	NM_147128	Intron_1..Intron_1
hsa-mir-548n	chr7	34946897	34946971	-	34935017	35044178	-	DPY19L1	NM_015283	Intron_4..Intron_4
hsa-mir-1200	chr7	36925487	36925562	-	36860485	36991190	-	ELMO1	NM_001039459	Intron_6..Intron_6
hsa-mir-1200	chr7	36925487	36925562	-	36860485	37455036	-	ELMO1	NM_014800	Intron_6..Intron_6
hsa-mir-1200	chr7	36925487	36925562	-	36860485	36992246	-	ELMO1	NM_130442	Intron_6..Intron_6
hsa-mir-590	chr7	73243464	73243560	+	73226641	73249365	+	EIF4H	NM_031992	Intron_4..Intron_4
hsa-mir-590	chr7	73243464	73243560	+	73226641	73249365	+	EIF4H	NM_022170	Intron_5..Intron_5
hsa-mir-1285-1	chr7	91671265	91671348	-	91666218	91713148	-	KRIT1	NM_004912	Intron_2..Intron_2
hsa-mir-1285-1	chr7	91671265	91671348	-	91666218	91713350	-	KRIT1	NM_194455	Intron_2..Intron_2
hsa-mir-1285-1	chr7	91671265	91671348	-	91666218	91713350	-	KRIT1	NM_194456	Intron_2..Intron_2
hsa-mir-1285-1	chr7	91671265	91671348	-	91666218	91713164	-	KRIT1	NM_001013406	Intron_2..Intron_2
hsa-mir-1285-1	chr7	91671265	91671348	-	91666218	91713164	-	KRIT1	NM_194454	Intron_2..Intron_2
hsa-mir-653	chr7	92950008	92950103	-	92891734	93041686	-	CALCR	NM_001742	Intron_11..Intron_11
hsa-mir-489	chr7	92951184	92951267	-	92891734	93041686	-	CALCR	NM_001742	Intron_11..Intron_11
hsa-mir-591	chr7	95686910	95687004	-	95587467	95789395	-	SLC25A13	NM_014251	Intron_14..Intron_14
hsa-mir-591	chr7	95686910	95687004	-	95587468	95789395	-	SLC25A13	NM_001160210	Intron_14..Intron_14
hsa-mir-591	chr7	95686910	95687004	-	95587468	95789395	-	SLC25A13	NR_027662	Intron_14..Intron_14
hsa-mir-25	chr7	99529119	99529202	-	99528339	99536316	-	MCM7	NM_182776	Intron_2..Intron_2
hsa-mir-25	chr7	99529119	99529202	-	99528339	99537363	-	MCM7	NM_005916	Intron_2..Intron_2
hsa-mir-93	chr7	99529327	99529406	-	99528339	99536316	-	MCM7	NM_182776	Intron_2..Intron_2
hsa-mir-93	chr7	99529327	99529406	-	99528339	99537363	-	MCM7	NM_005916	Intron_2..Intron_2
hsa-mir-106b	chr7	99529552	99529633	-	99528339	99536316	-	MCM7	NM_182776	Intron_2..Intron_2
hsa-mir-106b	chr7	99529552	99529633	-	99528339	99537363	-	MCM7	NM_005916	Intron_2..Intron_2
hsa-mir-548o	chr7	101833194	101833307	-	101823808	101854134	+	PRKRIP1	NM_024653	Intron_4..Intron_4
hsa-mir-592	chr7	126485378	126485474	-	125865887	126670805	-	GRM8	NM_000845	Intron_8..Intron_8
hsa-mir-592	chr7	126485378	126485474	-	125865887	126670805	-	GRM8	NM_001127326	Intron_9..Intron_9
hsa-mir-592	chr7	126485378	126485474	-	125865887	126670805	-	GRM8	NR_028041	Intron_9..Intron_9
hsa-mir-592	chr7	126485378	126485474	-	125865887	126679664	-	GRM8	NM_001127323	Intron_8..Intron_8
hsa-mir-593	chr7	127509149	127509248	+	127079437	127519895	+	SND1	NM_014390	Intron_18..Intron_18
hsa-mir-335	chr7	129923188	129923281	+	129913281	129933367	+	MEST	NM_177524	Intron_2..Intron_2
hsa-mir-335	chr7	129923188	129923281	+	129918408	129933367	+	MEST	NM_177525	Intron_2..Intron_2
hsa-mir-335	chr7	129923188	129923281	+	129919173	129933367	+	MEST	NM_002402	Intron_2..Intron_2
hsa-mir-490	chr7	136238454	136238581	+	136203938	136352311	+	CHRM2	NM_001006627	Intron_2..Intron_2
hsa-mir-490	chr7	136238454	136238581	+	136203938	136352311	+	CHRM2	NM_001006630	Intron_2..Intron_2
hsa-mir-490	chr7	136238454	136238581	+	136204371	136352311	+	CHRM2	NM_001006632	Intron_2..Intron_2
hsa-mir-490	chr7	136238454	136238581	+	136204371	136352311	+	CHRM2	NM_000739	Intron_2..Intron_2
hsa-mir-490	chr7	136238454	136238581	+	136204371	136352311	+	CHRM2	NM_001006631	Intron_2..Intron_2
hsa-mir-490	chr7	136238454	136238581	+	136204408	136352311	+	CHRM2	NM_001006626	Intron_2..Intron_2
hsa-mir-490	chr7	136238454	136238581	+	136204523	136352311	+	CHRM2	NM_001006629	Intron_1..Intron_1
hsa-mir-490	chr7	136238454	136238581	+	136204532	136352311	+	CHRM2	NM_001006628	Intron_1..Intron_1
hsa-mir-548f-4	chr7	146706042	146706146	-	145444385	147749019	+	CNTNAP2	NM_014141	Intron_9..Intron_9
hsa-mir-671	chr7	150566440	150566557	+	150560517	150566838	+	CHPF2	NM_019015	NA..NA
hsa-mir-153-2	chr7	157059789	157059875	-	157024510	158073243	-	PTPRN2	NM_130843	Intron_4..Intron_4
hsa-mir-153-2	chr7	157059789	157059875	-	157024510	158073243	-	PTPRN2	NM_130842	Intron_4..Intron_4
hsa-mir-153-2	chr7	157059789	157059875	-	157024510	158073243	-	PTPRN2	NM_002847	Intron_4..Intron_4
hsa-mir-595	chr7	158018171	158018266	-	157024510	158073243	-	PTPRN2	NM_130843	Intron_21..Intron_21
hsa-mir-595	chr7	158018171	158018266	-	157024510	158073243	-	PTPRN2	NM_130842	Intron_21..Intron_21
hsa-mir-595	chr7	158018171	158018266	-	157024510	158073243	-	PTPRN2	NM_002847	Intron_22..Intron_22
hsa-mir-597	chr8	9636592	9636688	+	9450854	9677266	+	TNKS	NM_003747	Intron_17..Intron_17
hsa-mir-1322	chr8	10720293	10720363	-	10660293	10734709	-	PINX1	NM_017884	Intron_2..Intron_2
hsa-mir-598	chr8	10930126	10930222	-	10791066	11096285	-	XKR6	NM_173683	Intron_2..Intron_2
hsa-mir-383	chr8	14755318	14755390	-	13991743	15140163	-	SGCZ	NM_139167	Intron_7..Intron_7
hsa-mir-486	chr8	41637116	41637183	-	41629901	41641961	-	ANK1	NM_020480	Intron_1..Intron_1
hsa-mir-486	chr8	41637116	41637183	-	41629901	41641961	-	ANK1	NM_020478	Intron_1..Intron_1
hsa-mir-486	chr8	41637116	41637183	-	41629901	41641961	-	ANK1	NM_001142445	Intron_1..Intron_1
hsa-mir-486	chr8	41637116	41637183	-	41629900	41774297	-	ANK1	NM_020475	Intron_1..Intron_1
hsa-mir-486	chr8	41637116	41637183	-	41629900	41774297	-	ANK1	NM_020476	Intron_1..Intron_1
hsa-mir-486	chr8	41637116	41637183	-	41629900	41774297	-	ANK1	NM_020477	Intron_1..Intron_1
hsa-mir-486	chr8	41637116	41637183	-	41629900	41774297	-	ANK1	NM_000037	Intron_1..Intron_1
hsa-mir-486	chr8	41637116	41637183	-	41629901	41873437	-	ANK1	NM_001142446	Intron_1..Intron_1
hsa-mir-599	chr8	100618040	100618134	-	100094669	100958984	+	VPS13B	NM_152564	Intron_30..Intron_30
hsa-mir-599	chr8	100618040	100618134	-	100094669	100958984	+	VPS13B	NM_017890	Intron_30..Intron_30
hsa-mir-875	chr8	100618190	100618265	-	100094669	100958984	+	VPS13B	NM_152564	Intron_30..Intron_30
hsa-mir-875	chr8	100618190	100618265	-	100094669	100958984	+	VPS13B	NM_017890	Intron_30..Intron_30
hsa-mir-1273	chr8	101105386	101105488	-	101042451	101187520	-	RGS22	NM_015668	Intron_14..Intron_14
hsa-mir-2053	chr8	113724898	113724988	+	113304332	114458558	-	CSMD3	NM_198124	Intron_51..Intron_51
hsa-mir-2053	chr8	113724898	113724988	+	113304332	114518418	-	CSMD3	NM_052900	Intron_50..Intron_50
hsa-mir-2053	chr8	113724898	113724988	+	113304332	114518418	-	CSMD3	NM_198123	Intron_51..Intron_51
hsa-mir-548d-1	chr8	124429455	124429551	-	124401271	124477886	-	ATAD2	NM_014109	Intron_13..Intron_13
hsa-mir-1204	chr8	128877390	128877456	+	128875960	129182681	+	PVT1	NR_003367	Intron_1..Intron_1
hsa-mir-1205	chr8	129042061	129042123	+	128875960	129182681	+	PVT1	NR_003367	Intron_4..Intron_4
hsa-mir-1206	chr8	129090326	129090384	+	128875960	129182681	+	PVT1	NR_003367	Intron_6..Intron_6
hsa-mir-1207	chr8	129130580	129130666	+	128875960	129182681	+	PVT1	NR_003367	Intron_6..Intron_6
hsa-mir-151	chr8	141811845	141811934	-	141737682	142080514	-	PTK2	NM_005607	Intron_10..Intron_10
hsa-mir-151	chr8	141811845	141811934	-	141737682	142080514	-	PTK2	NM_153831	Intron_10..Intron_10
hsa-mir-937	chr8	144967115	144967200	-	144945077	144969537	-	SCRIB	NM_015356	Exon_29..Exon_30
hsa-mir-937	chr8	144967115	144967200	-	144945077	144969537	-	SCRIB	NM_182706	Exon_30..Exon_31
hsa-mir-661	chr8	145091347	145091435	-	145061308	145097032	-	PLEC1	NM_201380	Intron_31..Intron_31
hsa-mir-661	chr8	145091347	145091435	-	145061308	145100076	-	PLEC1	NM_201379	Intron_31..Intron_31
hsa-mir-661	chr8	145091347	145091435	-	145061308	145119628	-	PLEC1	NM_201378	Intron_31..Intron_31
hsa-mir-661	chr8	145091347	145091435	-	145061308	145121531	-	PLEC1	NM_000445	Intron_31..Intron_31
hsa-mir-939	chr8	145590172	145590253	-	145589253	145605541	-	CPSF1	NM_013291	Exon_5..Intron_5
hsa-mir-1234	chr8	145596284	145596367	-	145589253	145605541	-	CPSF1	NM_013291	Intron_29..Exon_30
hsa-mir-101-2	chr9	4840297	4840375	+	4782833	4851064	+	RCL1	NM_005772	Intron_8..Intron_8
hsa-mir-491	chr9	20706104	20706187	+	20648308	20985954	+	KIAA1797	NM_017794	Intron_4..Intron_4
hsa-mir-31	chr9	21502114	21502184	-	21444266	21549697	-	LOC554202	NR_027054	Intron_3..Intron_3
hsa-mir-204	chr9	72614711	72614820	-	72339785	72673794	-	TRPM3	NM_206944	Intron_18..Intron_18
hsa-mir-204	chr9	72614711	72614820	-	72339785	72673794	-	TRPM3	NM_024971	Intron_20..Intron_20
hsa-mir-204	chr9	72614711	72614820	-	72339785	72673794	-	TRPM3	NM_206947	Intron_18..Intron_18
hsa-mir-204	chr9	72614711	72614820	-	72588597	72673794	-	TRPM3	NM_206948	Intron_1..Intron_1
hsa-mir-204	chr9	72614711	72614820	-	72339785	72673794	-	TRPM3	NM_020952	Intron_19..Intron_19
hsa-mir-204	chr9	72614711	72614820	-	72588597	72673794	-	TRPM3	NM_001007470	Intron_1..Intron_1
hsa-mir-204	chr9	72614711	72614820	-	72339785	72673794	-	TRPM3	NM_206945	Intron_19..Intron_19
hsa-mir-204	chr9	72614711	72614820	-	72339785	72673794	-	TRPM3	NM_206946	Intron_19..Intron_19
hsa-mir-204	chr9	72614711	72614820	-	72339785	72926334	-	TRPM3	NM_001007471	Intron_19..Intron_19
hsa-mir-7-1	chr9	85774483	85774592	-	85772817	85785004	-	HNRNPK	NM_031263	Intron_1..Intron_1
hsa-mir-7-1	chr9	85774483	85774592	-	85772817	85785389	-	HNRNPK	NM_002140	Intron_1..Intron_1
hsa-mir-7-1	chr9	85774483	85774592	-	85772817	85785389	-	HNRNPK	NM_031262	Intron_1..Intron_1
hsa-mir-23b	chr9	96887311	96887407	+	96528814	96889262	+	C9orf3	NM_032823	Intron_14..Intron_14
hsa-mir-27b	chr9	96887548	96887644	+	96528814	96889262	+	C9orf3	NM_032823	Intron_14..Intron_14
hsa-mir-24-1	chr9	96888124	96888191	+	96528814	96889262	+	C9orf3	NM_032823	Intron_14..Intron_14
hsa-mir-1302-8	chr9	99165657	99165784	-	99040599	99179390	+	KIAA1529	NM_020893	Intron_40..Intron_40
hsa-mir-32	chr9	110848330	110848399	-	110817235	110922046	-	C9orf5	NM_001099734	Intron_4..Intron_4
hsa-mir-32	chr9	110848330	110848399	-	110817235	110922046	-	C9orf5	NM_032012	Intron_4..Intron_4
hsa-mir-455	chr9	116011535	116011630	+	115958051	116112796	+	COL27A1	NM_032888	Intron_10..Intron_10
hsa-mir-600	chr9	124913646	124913743	-	124911594	124917577	-	C9orf45	NR_026677	NA..NA
hsa-mir-601	chr9	125204625	125204703	-	125203690	125732238	-	DENND1A	NM_024820	Intron_1..Intron_1
hsa-mir-601	chr9	125204625	125204703	-	125181753	125732238	-	DENND1A	NM_020946	Intron_2..Intron_2
hsa-mir-181a-2	chr9	126494542	126494651	+	126324523	126573397	-	NR6A1	NM_033334	Intron_8..Intron_8
hsa-mir-181a-2	chr9	126494542	126494651	+	126324523	126573397	-	NR6A1	NM_001489	Intron_8..Intron_8
hsa-mir-181b-2	chr9	126495810	126495898	+	126324523	126573397	-	NR6A1	NM_033334	Intron_8..Intron_8
hsa-mir-181b-2	chr9	126495810	126495898	+	126324523	126573397	-	NR6A1	NM_001489	Intron_8..Intron_8
hsa-mir-199b	chr9	130046821	130046930	-	130005483	130057348	+	DNM1	NM_004408	Intron_14..Intron_14
hsa-mir-199b	chr9	130046821	130046930	-	130005483	130057348	+	DNM1	NM_001005336	Intron_14..Intron_14
hsa-mir-126	chr9	138684875	138684959	+	138677202	138686951	+	EGFL7	NM_016215	Intron_7..Intron_7
hsa-mir-126	chr9	138684875	138684959	+	138677197	138686951	+	EGFL7	NM_201446	Intron_7..Intron_7
hsa-mir-1308	chrX	21990180	21990233	-	21960841	22176399	+	PHEX	NM_000444	Intron_3..Intron_3
hsa-mir-548f-5	chrX	32569512	32569597	-	31047265	33056465	-	DMD	NM_004010	Intron_68..Intron_68
hsa-mir-548f-5	chrX	32569512	32569597	-	31047265	32948238	-	DMD	NM_004007	Intron_68..Intron_68
hsa-mir-548f-5	chrX	32569512	32569597	-	31047265	33139594	-	DMD	NM_004006	Intron_68..Intron_68
hsa-mir-548f-5	chrX	32569512	32569597	-	31047265	33056466	-	DMD	NM_004009	Intron_68..Intron_68
hsa-mir-548f-5	chrX	32569512	32569597	-	31047265	33267647	-	DMD	NM_000109	Intron_68..Intron_68
hsa-mir-532	chrX	49654494	49654584	+	49573964	49750632	+	CLCN5	NM_001127899	Intron_3..Intron_3
hsa-mir-532	chrX	49654494	49654584	+	49573964	49750632	+	CLCN5	NM_001127898	Intron_3..Intron_3
hsa-mir-188	chrX	49654849	49654934	+	49573964	49750632	+	CLCN5	NM_001127899	Intron_3..Intron_3
hsa-mir-188	chrX	49654849	49654934	+	49573964	49750632	+	CLCN5	NM_001127898	Intron_3..Intron_3
hsa-mir-500	chrX	49659779	49659862	+	49573964	49750632	+	CLCN5	NM_001127899	Intron_3..Intron_3
hsa-mir-500	chrX	49659779	49659862	+	49573964	49750632	+	CLCN5	NM_001127898	Intron_3..Intron_3
hsa-mir-362	chrX	49660312	49660376	+	49573964	49750632	+	CLCN5	NM_001127899	Intron_3..Intron_3
hsa-mir-362	chrX	49660312	49660376	+	49573964	49750632	+	CLCN5	NM_001127898	Intron_3..Intron_3
hsa-mir-501	chrX	49661070	49661153	+	49573964	49750632	+	CLCN5	NM_001127899	Intron_3..Intron_3
hsa-mir-501	chrX	49661070	49661153	+	49573964	49750632	+	CLCN5	NM_001127898	Intron_3..Intron_3
hsa-mir-660	chrX	49664589	49664685	+	49573964	49750632	+	CLCN5	NM_001127899	Intron_3..Intron_3
hsa-mir-660	chrX	49664589	49664685	+	49573964	49750632	+	CLCN5	NM_001127898	Intron_3..Intron_3
hsa-mir-502	chrX	49665946	49666031	+	49573964	49750632	+	CLCN5	NM_001127899	Intron_3..Intron_3
hsa-mir-502	chrX	49665946	49666031	+	49573964	49750632	+	CLCN5	NM_001127898	Intron_3..Intron_3
hsa-mir-98	chrX	53599909	53600027	-	53575796	53730398	-	HUWE1	NM_031407	Intron_24..Intron_24
hsa-let-7f-2	chrX	53600878	53600960	-	53575796	53730398	-	HUWE1	NM_031407	Intron_24..Intron_24
hsa-mir-361	chrX	85045297	85045368	-	85002840	85189222	-	CHM	NM_000390	Intron_6..Intron_6
hsa-mir-652	chrX	109185213	109185310	+	109133017	109303430	+	TMEM164	NM_032227	Intron_2..Intron_2
hsa-mir-1912	chrX	113792275	113792354	+	113724806	114050880	+	HTR2C	NM_000868	Intron_2..Intron_2
hsa-mir-1264	chrX	113793386	113793454	+	113724806	114050880	+	HTR2C	NM_000868	Intron_2..Intron_2
hsa-mir-1298	chrX	113855906	113856017	+	113724806	114050880	+	HTR2C	NM_000868	Intron_2..Intron_2
hsa-mir-1911	chrX	113904000	113904079	+	113724806	114050880	+	HTR2C	NM_000868	Intron_4..Intron_4
hsa-mir-448	chrX	113964273	113964383	+	113724806	114050880	+	HTR2C	NM_000868	Intron_4..Intron_4
hsa-mir-1277	chrX	117404385	117404462	+	117364069	117467951	+	WDR44	NM_019045	Intron_2..Intron_2
hsa-mir-766	chrX	118664729	118664839	-	118633715	118711361	-	2006-09-01	NM_145802	Intron_5..Intron_5
hsa-mir-766	chrX	118664729	118664839	-	118633715	118711361	-	2006-09-01	NM_145800	Intron_6..Intron_6
hsa-mir-766	chrX	118664729	118664839	-	118634936	118711361	-	2006-09-01	NM_145799	Intron_6..Intron_6
hsa-mir-766	chrX	118664729	118664839	-	118634936	118711361	-	2006-09-01	NM_015129	Intron_5..Intron_5
hsa-mir-503	chrX	133508024	133508094	-	133505073	133508326	-	MGC16121	NR_024607	Intron_2..Intron_2
hsa-mir-424	chrX	133508310	133508407	-	133505073	133508326	-	MGC16121	NR_024607	NA..NA
hsa-mir-934	chrX	135460703	135460785	+	135441976	135466631	+	VGLL1	NM_016267	Intron_4..Intron_4
hsa-mir-504	chrX	137577538	137577620	-	137541401	137621493	-	FGF13	NM_004114	Intron_2..Intron_2
hsa-mir-504	chrX	137577538	137577620	-	137541401	137649181	-	FGF13	NM_033642	Intron_2..Intron_2
hsa-mir-504	chrX	137577538	137577620	-	137541401	138114851	-	FGF13	NM_001139500	Intron_2..Intron_2
hsa-mir-504	chrX	137577538	137577620	-	137541401	138114851	-	FGF13	NM_001139501	Intron_2..Intron_2
hsa-mir-504	chrX	137577538	137577620	-	137541401	138114851	-	FGF13	NM_001139498	Intron_2..Intron_2
hsa-mir-504	chrX	137577538	137577620	-	137541401	137777383	-	FGF13	NM_001139502	Intron_2..Intron_2
hsa-mir-224	chrX	150877706	150877786	-	150872251	150893807	-	GABRE	NM_004961	Intron_3..Intron_3
hsa-mir-452	chrX	150878756	150878840	-	150872251	150893807	-	GABRE	NM_004961	Intron_3..Intron_3
hsa-mir-105-1	chrX	151311347	151311427	-	151086289	151370487	-	GABRA3	NM_000808	Intron_9..Intron_9
hsa-mir-767	chrX	151312549	151312657	-	151086289	151370487	-	GABRA3	NM_000808	Intron_9..Intron_9
hsa-mir-105-2	chrX	151313540	151313620	-	151086289	151370487	-	GABRA3	NM_000808	Intron_9..Intron_9
hsa-mir-1184	chrX	153768829	153768927	-	153717257	153904192	-	F8	NM_000132	Intron_4..Intron_4
hsa-mir-1184	chrX	153768829	153768927	-	153767828	153769530	-	F8A1	NM_012151	NA..NA
hsa-mir-1184	chrX	153768829	153768927	-	153767843	153768959	-	F8A2	NM_001007523	NA..NA
hsa-mir-1184	chrX	153768829	153768927	-	153767843	153768959	-	F8A3	NM_001007524	NA..NA
hsa-mir-1184	chrX	154265943	154266041	-	154264942	154266644	-	F8A1	NM_012151	NA..NA
hsa-mir-1184	chrX	154265943	154266041	-	154264957	154266073	-	F8A2	NM_001007523	NA..NA
hsa-mir-1184	chrX	154265943	154266041	-	154264957	154266073	-	F8A3	NM_001007524	NA..NA
hsa-mir-1184	chrX	154340372	154340470	+	154339768	154341470	-	F8A1	NM_012151	NA..NA
hsa-mir-1184	chrX	154340372	154340470	+	154340339	154341455	-	F8A2	NM_001007523	NA..NA
hsa-mir-1184	chrX	154340372	154340470	+	154340339	154341455	-	F8A3	NM_001007524	NA..NA
